# Supplementary material for: Hydrahas mammal-like mutation rates facilitating fast adaptation despite its nonaging phenotype
Source: HighWire-hosted journal article supplement (doi:10.1101/gr.279025.124), 2024-12-01
Supplement: Supplemental_Figures_S1-S3.pdf [file Supplemental_Figures_S1-S3.pdf]

Supplement Figures S1-S3

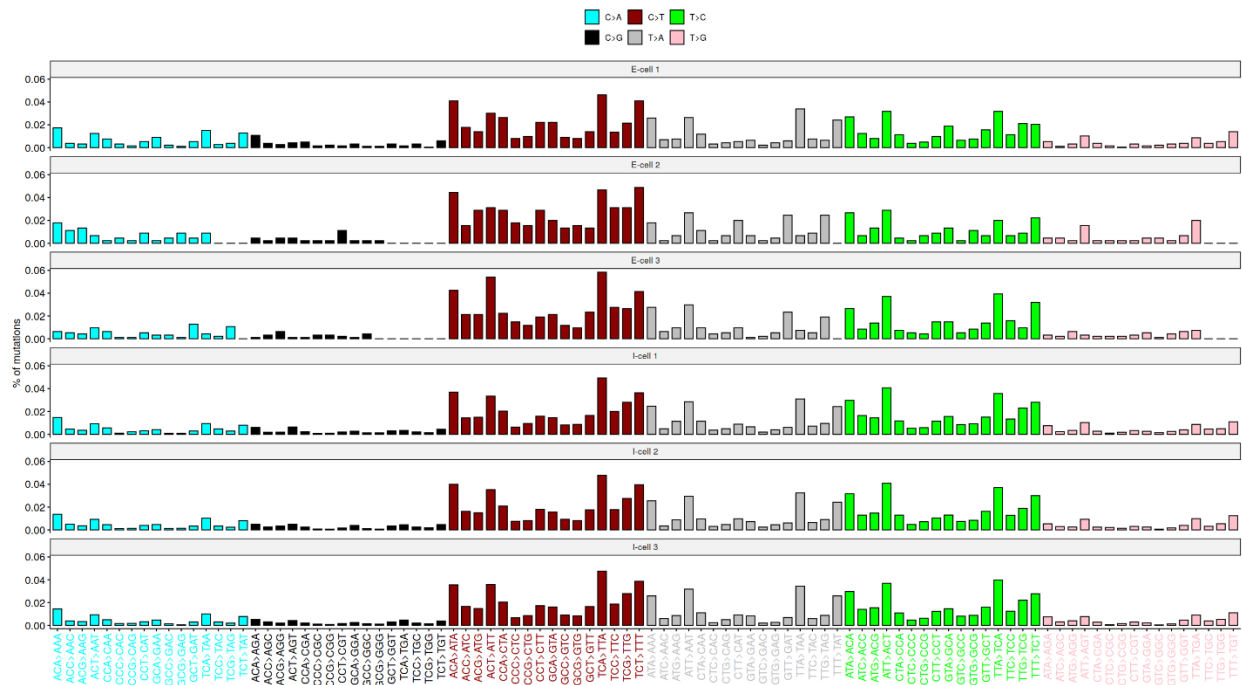

**Fig. S1.** Barplots of mutation types, including flanking bases, as a percentage of total mutations. Compare to [Fig 2b of Milholland et al, 2017, Nature communication.](#)

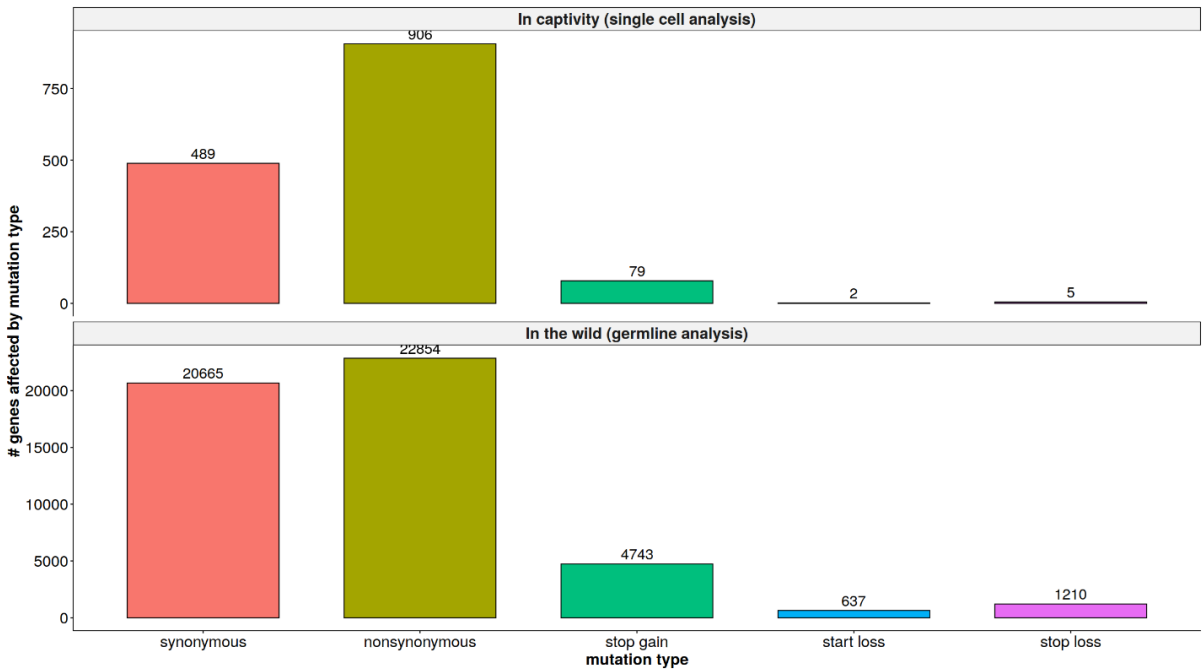

**Fig. S2.** Number of genes affected by different mutation types.

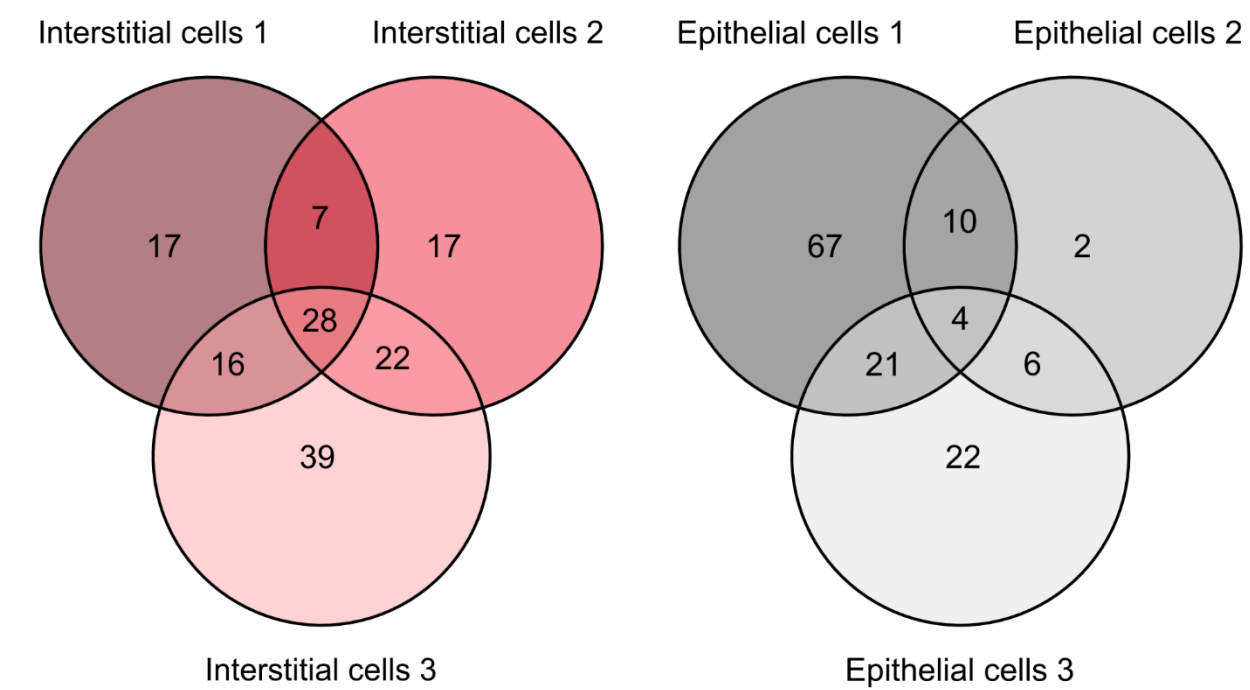

**Fig. S3.** Number of bases in million shared between the single-cell comparisons examined. Note that for each single-cell only genome positions were regarded with a read coverage  $\geq 20$  both in the respective single-cell and the merged mapping result of three single-cells of the opposite stem cell lineage. For this figure, the sets of genome positions fulfilling these criteria were intersected again between the comparisons of each stem cell lineage.
