# Supplementary material for: Hydrahas mammal-like mutation rates facilitating fast adaptation despite its nonaging phenotype
Source: HighWire-hosted journal article supplement (doi:10.1101/gr.279025.124), 2024-12-01
Supplement: Supplemental_Tables_S1-S8.xlsx [file Supplemental_Tables_S1-S8.xlsx]

## Sheet: S1 Sequencing overview
Supplement Table S1. Overview of sequenced samples and runs.
Sample name	ENA sample alias	ENA Sample Acession	ENA Run Accession	Instrument	Read length	Layout	# raw reads	# trimmed /clipped reads	# mapped*	% mapped reads*	#downsampled mapped reads	age at sampling [years]
Genomic sequencing of whole individuals
Hm_175 (mother)	Hm_175	ERS10155610	ERR8097582	Illumina HiSeq 2500	101	Paired	191772344	181313656	143284411	79.0257	-	12.6
Hm_175bud1	Hm_175bud1	ERS10155611	ERR8097583	Illumina HiSeq 2500	101	Paired	193907066	183529800	146970938	80.0801	114191644	0.08
Hm_175bud3	Hm_175bud3	ERS10155612	ERR8097584	Illumina HiSeq 2500	101	Paired	151634828	143152214	114184236	79.7642	114184236	0.08
Hm_175_508	Hm_175_508	ERS10155613	ERR8097585	Illumina HiSeq 2500	101	Paired	304270904	291675444	217673015	74.6285	114179381	12.3
Hm_175_734	Hm_175_734	ERS10155614	ERR8097586	Illumina HiSeq 2500	101	Paired	301307262	288526022	200594495	69.5239	114180505	12
Hm_175_1170	Hm_175_1170	ERS10155615	ERR8097587	Illumina HiSeq 2500	101	Paired	281691366	269417806	191168815	70.9563	114183432	11.1
Hm_175_2003	Hm_175_2003	ERS10155616	ERR8097588	Illumina HiSeq 2500	101	Paired	302569246	288353230	206595888	71.6468	114174046	8.1
			ERR8097589	Illumina HiSeq 2500	101	Paired
Hm_175_2419	Hm_175_2419	ERS10155617	ERR8097590	Illumina HiSeq 2500	101	Paired	304890926	291220598	209622454	71.9806	114193577	7.3
			ERR8097591	Illumina HiSeq 2500	101	Paired
Hm_175_2450	Hm_175_2450	ERS10155618	ERR8097592	Illumina HiSeq 2500	101	Paired	290725490	277094642	199573968	72.0238	114182627	7.2
			ERR8097593	Illumina HiSeq 2500	101	Paired
Transcriptomic sequencing of whole individuals
Hm_175 (mother)	Hm_175	ERS10155610	ERR10230818	Illumina HiSeq 2500	103	Single	42511134	42246209	37236153	88.1408	-	12.6
Hm_175bud1	Hm_175bud1	ERS10155611	ERR10230819	Illumina HiSeq 2500	103	Single	49091654	48769857	43120506	88.4163	-	0.08
Hm_175bud3	Hm_175bud3	ERS10155612	ERR10230820	Illumina HiSeq 2500	103	Single	48769857	48009581	42377488	88.2688	-	0.08
Genomic sequencing of single cells
I-Cell 1	sample1	ERS10155604	ERR8097576	Illumina HiSeq 2500	101	Paired	394187630	386748890	267099980	69.0629	-	-
I-Cell 2	sample2	ERS10155605	ERR8097577	Illumina HiSeq 2500	101	Paired	410744452	404439178	323256402	79.9271	-	-
I-Cell 3	sample3	ERS10155606	ERR8097578	Illumina HiSeq 2500	101	Paired	454787772	447276324	357828709	80.0017	-	-
E-cell 1	sample5	ERS10155607	ERR8097579	Illumina HiSeq 2500	101	Paired	575099324	324172296	204675738	63.1379	-	-
E-cell 2	sample6	ERS10155608	ERR8097580	Illumina NovaSeq 6000	251	Paired	555588482	555381686	82669390	14.8851	-	-
			ERR8105991	Illumina HiSeq 2500	101	Paired	196913256	194421370			-	-
E-cell 3	sample7	ERS10155609	ERR8097581	Illumina NovaSeq 6000	251	Paired	334178680	334009478	123791967	37.0624	-	-
*also deduplicated for genomic sequencing of whole individuals and single-cells

## Sheet: S2 Variant stats single cells
Supplement Table S2. Overview of mutation statistics in single cells.
Whole genome
	I-Cells			E-cells
	I-cell 1	I-cell 2	I-cell 3	E-cell 1	E-cell 2	E-cell 3	# Unique across all cells
mutations	11098	12551	19729	1855	450	943	41157
covered bases (coverage >=20)	67788130	74152422	105544480	102061673	22487517	52692380
mutations per base	0.000163716	0.000169259	0.000186926	1.81753e-05	2.00111e-05	1.78963e-05
mutation rate per cell division	1.14549e-08	1.18428e-08	1.30789e-08	3.9467e-09	4.34535e-09	3.88613e-09
Validation
MAPD-score	0.783483	0.934414	0.696243	0.687145	1.26927	1.12403
SBS scE fraction (single-cell artefact signature)	0.0016252	0.00159542	0.00167362	0.00577329	0.00870176	0.00667732
Combined SBS scE and scF fractions (single-cell artefact signatures)	0.0126689	0.012856	0.0176238	0.0252774	0.0352947	0.0291558
Coding sequence
	I-Cells			E-cells
	I-cell 1	I-cell 2	I-cell 3	E-cell 1	E-cell 2	E-cell 3
mutations	633	645	1007	73	26	50	2172
covered bases (coverage >=20)	4366353	4685795	6445011	6196588	1406194	2863549
mutations per base	0.000144972	0.00013765	0.000156245	1.17807e-05	1.84896e-05	1.74609e-05
mutation rate per cell division	1.01435e-08	9.63116e-09	1.09322e-08	2.55814e-09	4.01496e-09	3.79157e-09

## Sheet: S3 Variant stats individuals
Supplement Table S3. Overview of numbers of identified variants in sequenced individuals.
		Hm_175 (mother)	Hm_175_1170	Hm_175_2003	Hm_175_2419	Hm_175_2450	Hm_175_508	Hm_175_734	Hm_175bud1	Hm_175bud3_DNA
Buds vs mother	# Originally identified variants	-	27552	27876	27817	27200	27792	28171	24501	24499
	# Variants with FDR < 0.05	-	16	12	7	2	5	0	3	1
	# single-cell confirmed variants	-	82	101	102	94	102	111	86	85
	# combined variants	-	98	113	109	96	107	111	89	86
	# combined in CDS	-	9	12	8	12	9	6	6	8
	# covered bases (coverage >=10)	-	442899416	444134901	444501442	442490571	444741572	446124571	436604376	440643443
	Fraction genome covered	-	0.51875	0.520197	0.520626	0.518271	0.520907	0.522527	0.511376	0.516107
Individuals vs. reference	# Variants	4745425	4596828	4688619	4714096	4643414	5209099	4669927	3978881	3378816
	# Variants in CDS	161278	175533	177673	177469	176180	178722	176748	162003	144397
	# covered bases (coverage >=10)	564766798	654775680	673324854	677996427	665687347	684235514	669090656	567359018	475153469
	Fraction genome covered	0.661488	0.766911	0.788637	0.794109	0.779692	0.801416	0.783678	0.664524	0.556527

## Sheet: S4  dN dS single-cells
Supplement Table S4. All examined biological processes under positve and strong negative selection in the single-cell comparison.
#all genes	33820
#all expressed genes	11783
GO_ID	Description	#genes	genes	#expressed_genes	expressed_genes	p_value_more_expressed_than_expected	fdr_more_expressed_than_expected	#covered_bases	nonsynonymous	synonymous	#bases	#synonymous_sites	#nonsynonymous_sites	%covered_bases	#expected_nonsynonymous	dN/dS
Positive selection (dN/dS>1)
GO:0048699	generation of neurons	156	Sc4wPfr_926.1.g9713,Sc4wPfr_926.1.g9713,Sc4wPfr_1300.g9811,Sc4wPfr_1300.g9811,Sc4wPfr_165.g9991,Sc4wPfr_165.g9991,Sc4wPfr_78.g10420,Sc4wPfr_274.g10457,Sc4wPfr_5.2.g10955,Sc4wPfr_5.2.g10955,Sc4wPfr_1687.g11207,Sc4wPfr_4211.g11323,Sc4wPfr_730.1.g118,Sc4wPfr_272.g11400,Sc4wPfr_802.g11765,Sc4wPfr_96.g11925,Sc4wPfr_2598.g12025,Sc4wPfr_657.g12382,Sc4wPfr_320.g1230,Sc4wPfr_729.g12887,Sc4wPfr_1747.g1269,…	85	Sc4wPfr_926.1.g9713,Sc4wPfr_1300.g9811,Sc4wPfr_78.g10420,Sc4wPfr_5.2.g10955,Sc4wPfr_730.1.g118,Sc4wPfr_272.g11400,Sc4wPfr_802.g11765,Sc4wPfr_96.g11925,Sc4wPfr_729.g12887,Sc4wPfr_1747.g1269,Sc4wPfr_1747.g1276,Sc4wPfr_896.g13017,Sc4wPfr_266.2.g14192,Sc4wPfr_266.2.g14193,Sc4wPfr_514.g14427,Sc4wPfr_514.g14439,Sc4wPfr_2145.g14629,Sc4wPfr_365.g14938,Sc4wPfr_365.g14967,Sc4wPfr_57.g1483,Sc4wPfr_833.g1509…	1.6529e-07	1.0744e-05	65045	11	0	328509	70837	255875	19.8001	7.64969	#NUM!
GO:0090304	nucleic acid metabolic process	574	Sc4wPfr_2575.g9477,Sc4wPfr_952.1.g9539,Sc4wPfr_1463.g9574,Sc4wPfr_85.g956,Sc4wPfr_662.g967,Sc4wPfr_662.g976,Sc4wPfr_662.g980,Sc4wPfr_165.g10009,Sc4wPfr_165.g10061,Sc4wPfr_165.g10062,Sc4wPfr_662.g994,Sc4wPfr_388.1.g10277,Sc4wPfr_388.1.g10289,Sc4wPfr_504.g10318,Sc4wPfr_78.g10415,Sc4wPfr_2233.g10474,Sc4wPfr_552.g10535,Sc4wPfr_178.g10643,Sc4wPfr_178.g10659,Sc4wPfr_1320.g10826,Sc4wPfr_4670.g10939,Sc4w…	75	Sc4wPfr_952.1.g9539,Sc4wPfr_388.1.g10289,Sc4wPfr_552.g10535,Sc4wPfr_144.1.g11739,Sc4wPfr_4566.g1215,Sc4wPfr_161.1.g12939,Sc4wPfr_297.g13138,Sc4wPfr_1010.g13523,Sc4wPfr_133.g14106,Sc4wPfr_562.2.g1398,Sc4wPfr_387.2.g14821,Sc4wPfr_618.g14867,Sc4wPfr_825.g15296,Sc4wPfr_144.2.g1689,Sc4wPfr_26.g17227,Sc4wPfr_163.g17467,Sc4wPfr_615.g17529,Sc4wPfr_224.g18166,Sc4wPfr_66.g19075,Sc4wPfr_347.g19322,Sc4wPfr_1…	1	1	270659	30	2	909429	207371	699172	29.7614	22.2536	4.44903
GO:0019838	growth factor binding	75	Sc4wPfr_165.g9991,Sc4wPfr_165.g9991,Sc4wPfr_388.1.g10244,Sc4wPfr_158.2.g10589,Sc4wPfr_569.g11122,Sc4wPfr_1280.g11902,Sc4wPfr_27.g12239,Sc4wPfr_27.g12254,Sc4wPfr_27.g12259,Sc4wPfr_657.g12382,Sc4wPfr_320.g1230,Sc4wPfr_320.g1231,Sc4wPfr_320.g1232,Sc4wPfr_320.g1232,Sc4wPfr_320.g1240,Sc4wPfr_320.g1240,Sc4wPfr_320.g1240,Sc4wPfr_896.g13017,Sc4wPfr_896.g13017,Sc4wPfr_896.g13017,Sc4wPfr_896.g13018,Sc4wPfr…	24	Sc4wPfr_388.1.g10244,Sc4wPfr_569.g11122,Sc4wPfr_896.g13017,Sc4wPfr_896.g13018,Sc4wPfr_250.g16094,Sc4wPfr_467.g16204,Sc4wPfr_455.g20372,Sc4wPfr_79.3.g21345,Sc4wPfr_79.3.g21354,Sc4wPfr_760.g24146,Sc4wPfr_118.g25110,Sc4wPfr_1163.g25185,Sc4wPfr_113.1.g28324,Sc4wPfr_113.1.g28325,Sc4wPfr_113.1.g28326,Sc4wPfr_739.g28832,Sc4wPfr_169.g29119,Sc4wPfr_417.3.g31858,Sc4wPfr_45.g3328,Sc4wPfr_62.g4389,Sc4wPfr_10…	0.64978	1	34797	12	1	175947	37612.5	136588	19.777	9.04054	3.30459
GO:0090287	regulation of cellular response to growth factor stimulus	127	Sc4wPfr_165.g9991,Sc4wPfr_165.g9991,Sc4wPfr_388.1.g10236,Sc4wPfr_388.1.g10239,Sc4wPfr_388.1.g10244,Sc4wPfr_529.g10440,Sc4wPfr_158.2.g10589,Sc4wPfr_5.2.g10995,Sc4wPfr_90.g1140,Sc4wPfr_90.g1140,Sc4wPfr_90.g1141,Sc4wPfr_1280.g11902,Sc4wPfr_27.g12239,Sc4wPfr_27.g12254,Sc4wPfr_27.g12259,Sc4wPfr_657.g12382,Sc4wPfr_320.g1230,Sc4wPfr_320.g1231,Sc4wPfr_320.g1232,Sc4wPfr_320.g1232,Sc4wPfr_320.g1240,Sc4wPfr…	39	Sc4wPfr_388.1.g10236,Sc4wPfr_388.1.g10239,Sc4wPfr_388.1.g10244,Sc4wPfr_90.g1140,Sc4wPfr_896.g13017,Sc4wPfr_133.g14070,Sc4wPfr_2145.g14585,Sc4wPfr_250.g16094,Sc4wPfr_467.g16204,Sc4wPfr_68.2.g16398,Sc4wPfr_68.2.g16399,Sc4wPfr_68.2.g16408,Sc4wPfr_615.g17540,Sc4wPfr_634.1.g17845,Sc4wPfr_400.g17905,Sc4wPfr_455.g20372,Sc4wPfr_1630.1.g20735,Sc4wPfr_320.1.g20941,Sc4wPfr_320.1.g20944,Sc4wPfr_962.g23742,Sc…	0.811564	1	54068	11	1	280907	59497	218996	19.2477	8.34511	2.98855
GO:0043025	neuronal cell body	192	Sc4wPfr_1594.g9453,Sc4wPfr_721.1.g9941,Sc4wPfr_696.g10805,Sc4wPfr_2759.g10847,Sc4wPfr_1687.g11205,Sc4wPfr_174.g11794,Sc4wPfr_174.g11799,Sc4wPfr_174.g11799,Sc4wPfr_146.g12030,Sc4wPfr_146.g12032,Sc4wPfr_146.g12032,Sc4wPfr_59.2.g12439,Sc4wPfr_304.2.g12724,Sc4wPfr_292.g13058,Sc4wPfr_397.g1305,Sc4wPfr_397.g1305,Sc4wPfr_397.g1310,Sc4wPfr_325.g13754,Sc4wPfr_325.g13763,Sc4wPfr_325.g13768,Sc4wPfr_325.g137…	104	Sc4wPfr_2759.g10847,Sc4wPfr_174.g11794,Sc4wPfr_174.g11799,Sc4wPfr_146.g12030,Sc4wPfr_146.g12032,Sc4wPfr_304.2.g12724,Sc4wPfr_292.g13058,Sc4wPfr_397.g1305,Sc4wPfr_133.g14102,Sc4wPfr_32.g14551,Sc4wPfr_365.g14887,Sc4wPfr_1080.g15230,Sc4wPfr_326.g15678,Sc4wPfr_352.g15749,Sc4wPfr_352.g15750,Sc4wPfr_250.g15997,Sc4wPfr_250.g16039,Sc4wPfr_1384.g16100,Sc4wPfr_1384.g16105,Sc4wPfr_262.g16783,Sc4wPfr_641.g16…	1.354e-08	9.884e-07	61674	9	1	261383	56406.7	200513	23.5953	6.95426	2.53185
GO:0043168	anion binding	199	Sc4wPfr_165.g9991,Sc4wPfr_165.g9991,Sc4wPfr_558.1.g10141,Sc4wPfr_1066.g10192,Sc4wPfr_529.g10440,Sc4wPfr_178.g10649,Sc4wPfr_498.g10896,Sc4wPfr_5.2.g10995,Sc4wPfr_197.g11037,Sc4wPfr_351.g11267,Sc4wPfr_272.g11399,Sc4wPfr_90.g1140,Sc4wPfr_90.g1140,Sc4wPfr_90.g1140,Sc4wPfr_90.g1141,Sc4wPfr_146.g12046,Sc4wPfr_146.g12046,Sc4wPfr_27.g12239,Sc4wPfr_27.g12254,Sc4wPfr_27.g12259,Sc4wPfr_657.g12382,Sc4wPfr_32…	102	Sc4wPfr_558.1.g10141,Sc4wPfr_178.g10649,Sc4wPfr_351.g11267,Sc4wPfr_272.g11399,Sc4wPfr_90.g1140,Sc4wPfr_146.g12046,Sc4wPfr_320.g1228,Sc4wPfr_828.1.g12768,Sc4wPfr_729.g12885,Sc4wPfr_896.g13017,Sc4wPfr_303.g13729,Sc4wPfr_138.g13934,Sc4wPfr_514.g14422,Sc4wPfr_514.g14423,Sc4wPfr_514.g14425,Sc4wPfr_2145.g14627,Sc4wPfr_104.g15008,Sc4wPfr_104.g15038,Sc4wPfr_4692.g15437,Sc4wPfr_326.g15676,Sc4wPfr_274.2.g1…	6.85e-07	4.0415e-05	64711	9	1	374516	81115.5	291182	17.2786	6.95426	2.50719
GO:0016477	cell migration	311	Sc4wPfr_1463.g9569,Sc4wPfr_165.g9991,Sc4wPfr_165.g9991,Sc4wPfr_558.1.g10127,Sc4wPfr_558.1.g10127,Sc4wPfr_558.1.g10136,Sc4wPfr_388.1.g10236,Sc4wPfr_649.g10292,Sc4wPfr_649.g10292,Sc4wPfr_78.g10410,Sc4wPfr_78.g10420,Sc4wPfr_529.g10437,Sc4wPfr_696.g10805,Sc4wPfr_5.2.g10955,Sc4wPfr_5.2.g10955,Sc4wPfr_5.2.g10995,Sc4wPfr_5.2.g10995,Sc4wPfr_197.g11037,Sc4wPfr_1515.g11092,Sc4wPfr_1515.g11093,Sc4wPfr_569.g…	173	Sc4wPfr_1463.g9569,Sc4wPfr_558.1.g10127,Sc4wPfr_388.1.g10236,Sc4wPfr_78.g10410,Sc4wPfr_78.g10420,Sc4wPfr_529.g10437,Sc4wPfr_5.2.g10955,Sc4wPfr_1515.g11092,Sc4wPfr_1515.g11093,Sc4wPfr_569.g11122,Sc4wPfr_621.g1115,Sc4wPfr_923.g11432,Sc4wPfr_90.g1140,Sc4wPfr_73.g11553,Sc4wPfr_328.2.g12068,Sc4wPfr_657.g12379,Sc4wPfr_320.g1228,Sc4wPfr_320.g1229,Sc4wPfr_2890.g12845,Sc4wPfr_729.g12870,Sc4wPfr_896.g13017…	1.8512e-14	1.9067e-12	110325	22	3	573274	123549	447048	19.2447	17.3857	2.02672
GO:1902532	negative regulation of intracellular signal transduction	112	Sc4wPfr_580.g9604,Sc4wPfr_926.1.g9729,Sc4wPfr_165.g9991,Sc4wPfr_165.g9991,Sc4wPfr_78.g10410,Sc4wPfr_178.g10646,Sc4wPfr_280.g11448,Sc4wPfr_322.g12148,Sc4wPfr_27.g12239,Sc4wPfr_27.g12254,Sc4wPfr_27.g12259,Sc4wPfr_657.g12382,Sc4wPfr_320.g1230,Sc4wPfr_320.g1231,Sc4wPfr_59.2.g12464,Sc4wPfr_320.g1232,Sc4wPfr_320.g1232,Sc4wPfr_320.g1240,Sc4wPfr_320.g1240,Sc4wPfr_320.g1240,Sc4wPfr_729.g12876,Sc4wPfr_896.…	45	Sc4wPfr_78.g10410,Sc4wPfr_178.g10646,Sc4wPfr_322.g12148,Sc4wPfr_59.2.g12464,Sc4wPfr_896.g13017,Sc4wPfr_896.g13018,Sc4wPfr_303.g13709,Sc4wPfr_365.g14965,Sc4wPfr_250.g16074,Sc4wPfr_467.g16204,Sc4wPfr_3789.g17958,Sc4wPfr_14.g1834,Sc4wPfr_439.g20907,Sc4wPfr_439.g20910,Sc4wPfr_320.1.g20953,Sc4wPfr_50.g22222,Sc4wPfr_252.g22319,Sc4wPfr_1793.g22867,Sc4wPfr_650.g22968,Sc4wPfr_804.g24080,Sc4wPfr_760.g24146…	0.100024	1	55456	14	2	220579	46822.2	171560	25.1411	11.1268	1.91049
GO:0010604	positive regulation of macromolecule metabolic process	158	Sc4wPfr_1838.g9423,Sc4wPfr_926.1.g9729,Sc4wPfr_529.g10439,Sc4wPfr_552.g10498,Sc4wPfr_1320.g10818,Sc4wPfr_1320.g10827,Sc4wPfr_280.g11448,Sc4wPfr_73.g11496,Sc4wPfr_73.g11504,Sc4wPfr_689.g11897,Sc4wPfr_59.2.g12448,Sc4wPfr_1505.3.g13299,Sc4wPfr_4233.g13416,Sc4wPfr_4233.g13416,Sc4wPfr_156.g13809,Sc4wPfr_32.g14477,Sc4wPfr_32.g14521,Sc4wPfr_32.g14550,Sc4wPfr_2145.g14585,Sc4wPfr_2145.g14589,Sc4wPfr_635.g…	86	Sc4wPfr_1838.g9423,Sc4wPfr_1320.g10818,Sc4wPfr_1320.g10827,Sc4wPfr_73.g11496,Sc4wPfr_73.g11504,Sc4wPfr_689.g11897,Sc4wPfr_59.2.g12448,Sc4wPfr_32.g14521,Sc4wPfr_32.g14550,Sc4wPfr_2145.g14585,Sc4wPfr_635.g14748,Sc4wPfr_243.g15582,Sc4wPfr_1100.g15605,Sc4wPfr_1483.g15774,Sc4wPfr_250.g16022,Sc4wPfr_776.g16567,Sc4wPfr_615.1.g17588,Sc4wPfr_224.g18074,Sc4wPfr_854.g18438,Sc4wPfr_6.g19136,Sc4wPfr_347.g1929…	1.5082e-07	9.9538e-06	77815	13	2	314758	67138.5	246368	24.7222	10.4314	1.77137
GO:0006259	DNA metabolic process	453	Sc4wPfr_85.g933,Sc4wPfr_85.g936,Sc4wPfr_952.1.g9517,Sc4wPfr_952.1.g9518,Sc4wPfr_580.g9602,Sc4wPfr_307.g9644,Sc4wPfr_1309.1.g9684,Sc4wPfr_1309.1.g9686,Sc4wPfr_516.2.g9788,Sc4wPfr_165.g10002,Sc4wPfr_165.g10023,Sc4wPfr_165.g10072,Sc4wPfr_662.g1000,Sc4wPfr_469.1.g10217,Sc4wPfr_388.1.g10237,Sc4wPfr_504.g10314,Sc4wPfr_103.3.g10562,Sc4wPfr_178.g10626,Sc4wPfr_637.2.g1049,Sc4wPfr_707.g10755,Sc4wPfr_28.g10…	60	Sc4wPfr_952.1.g9517,Sc4wPfr_952.1.g9518,Sc4wPfr_469.1.g10217,Sc4wPfr_1213.g1093,Sc4wPfr_180.g11703,Sc4wPfr_90.g1193,Sc4wPfr_3075.g13311,Sc4wPfr_2145.g14606,Sc4wPfr_921.g15146,Sc4wPfr_17.g15836,Sc4wPfr_250.g16022,Sc4wPfr_523.g16373,Sc4wPfr_399.1.g16981,Sc4wPfr_144.2.g1683,Sc4wPfr_14.g1759,Sc4wPfr_484.g18312,Sc4wPfr_66.g19081,Sc4wPfr_270.1.g19686,Sc4wPfr_39.g20468,Sc4wPfr_320.1.g20962,Sc4wPfr_188.g…	1	1	186931	12	2	627851	141702	485640	29.7731	9.73597	1.75071
GO:0050793	regulation of developmental process	112	Sc4wPfr_926.1.g9713,Sc4wPfr_926.1.g9713,Sc4wPfr_469.1.g10204,Sc4wPfr_469.1.g10204,Sc4wPfr_552.g10498,Sc4wPfr_5.2.g10991,Sc4wPfr_272.g11361,Sc4wPfr_773.g11714,Sc4wPfr_773.g11714,Sc4wPfr_59.2.g12428,Sc4wPfr_59.2.g12439,Sc4wPfr_1121.g1259,Sc4wPfr_303.g13678,Sc4wPfr_303.g13686,Sc4wPfr_303.g13707,Sc4wPfr_301.g14000,Sc4wPfr_133.g14070,Sc4wPfr_597.2.g14347,Sc4wPfr_635.g14737,Sc4wPfr_635.g14748,Sc4wPfr_4…	55	Sc4wPfr_926.1.g9713,Sc4wPfr_773.g11714,Sc4wPfr_301.g14000,Sc4wPfr_133.g14070,Sc4wPfr_597.2.g14347,Sc4wPfr_635.g14748,Sc4wPfr_472.g14883,Sc4wPfr_250.g16071,Sc4wPfr_68.2.g16398,Sc4wPfr_68.2.g16399,Sc4wPfr_172.1.g1624,Sc4wPfr_262.2.g17823,Sc4wPfr_634.1.g17831,Sc4wPfr_400.g17905,Sc4wPfr_1185.g18745,Sc4wPfr_6.g19165,Sc4wPfr_39.g20458,Sc4wPfr_1009.2.g21388,Sc4wPfr_1009.2.g21389,Sc4wPfr_2181.g21748,Sc4w…	0.00067749	0.0284545	54516	12	2	217158	46197.2	168135	25.1043	9.73597	1.64861
GO:0005759	mitochondrial matrix	231	Sc4wPfr_580.g9596,Sc4wPfr_307.g9625,Sc4wPfr_307.g9634,Sc4wPfr_307.g9643,Sc4wPfr_307.g9660,Sc4wPfr_307.g9661,Sc4wPfr_1309.1.g9689,Sc4wPfr_926.1.g9731,Sc4wPfr_165.g9989,Sc4wPfr_662.g995,Sc4wPfr_504.g10316,Sc4wPfr_78.g10412,Sc4wPfr_552.g10534,Sc4wPfr_552.g10540,Sc4wPfr_2313.g10574,Sc4wPfr_2313.g10575,Sc4wPfr_2494.g10687,Sc4wPfr_293.1.g10877,Sc4wPfr_1114.g10912,Sc4wPfr_1114.g10915,Sc4wPfr_796.1.g1100…	212	Sc4wPfr_580.g9596,Sc4wPfr_307.g9625,Sc4wPfr_307.g9634,Sc4wPfr_307.g9643,Sc4wPfr_307.g9660,Sc4wPfr_307.g9661,Sc4wPfr_1309.1.g9689,Sc4wPfr_926.1.g9731,Sc4wPfr_165.g9989,Sc4wPfr_662.g995,Sc4wPfr_504.g10316,Sc4wPfr_78.g10412,Sc4wPfr_552.g10534,Sc4wPfr_552.g10540,Sc4wPfr_2313.g10574,Sc4wPfr_2313.g10575,Sc4wPfr_2494.g10687,Sc4wPfr_293.1.g10877,Sc4wPfr_1114.g10912,Sc4wPfr_1114.g10915,Sc4wPfr_796.1.g1100…	1.2019e-75	2.2956e-73	57807	11	2	281096	62656.8	217924	20.5649	9.04054	1.58136
GO:0044424	intracellular part	373	Sc4wPfr_302.1.g9433,Sc4wPfr_307.g9671,Sc4wPfr_1309.1.g9694,Sc4wPfr_516.2.g9737,Sc4wPfr_122.g9861,Sc4wPfr_122.g9861,Sc4wPfr_721.1.g9956,Sc4wPfr_382.g9975,Sc4wPfr_165.g10085,Sc4wPfr_165.g10089,Sc4wPfr_165.g10106,Sc4wPfr_558.1.g10118,Sc4wPfr_388.1.g10256,Sc4wPfr_388.1.g10265,Sc4wPfr_649.g10296,Sc4wPfr_649.g10305,Sc4wPfr_504.g10332,Sc4wPfr_637.2.g1026,Sc4wPfr_552.g10531,Sc4wPfr_342.g10873,Sc4wPfr_534…	203	Sc4wPfr_302.1.g9433,Sc4wPfr_307.g9671,Sc4wPfr_1309.1.g9694,Sc4wPfr_516.2.g9737,Sc4wPfr_165.g10089,Sc4wPfr_165.g10106,Sc4wPfr_558.1.g10118,Sc4wPfr_388.1.g10256,Sc4wPfr_649.g10296,Sc4wPfr_649.g10305,Sc4wPfr_504.g10332,Sc4wPfr_637.2.g1026,Sc4wPfr_272.g11398,Sc4wPfr_90.g1127,Sc4wPfr_923.g11431,Sc4wPfr_1909.g11470,Sc4wPfr_773.g11726,Sc4wPfr_144.1.g11734,Sc4wPfr_90.g1173,Sc4wPfr_90.g1176,Sc4wPfr_90.g11…	2.6754e-15	3.0232e-13	168796	11	2	629118	135764	492382	26.8306	9.04054	1.51652
GO:0016787	hydrolase activity	685	Sc4wPfr_2575.g9477,Sc4wPfr_952.1.g9539,Sc4wPfr_1463.g9574,Sc4wPfr_85.g956,Sc4wPfr_662.g967,Sc4wPfr_122.g9864,Sc4wPfr_662.g976,Sc4wPfr_662.g980,Sc4wPfr_165.g10009,Sc4wPfr_165.g10061,Sc4wPfr_165.g10062,Sc4wPfr_165.g10072,Sc4wPfr_662.g994,Sc4wPfr_388.1.g10277,Sc4wPfr_504.g10318,Sc4wPfr_78.g10415,Sc4wPfr_2233.g10474,Sc4wPfr_178.g10643,Sc4wPfr_178.g10659,Sc4wPfr_1320.g10826,Sc4wPfr_4670.g10939,Sc4wPfr…	110	Sc4wPfr_952.1.g9539,Sc4wPfr_796.1.g11003,Sc4wPfr_501.g11117,Sc4wPfr_351.g11274,Sc4wPfr_923.g11431,Sc4wPfr_1909.g11472,Sc4wPfr_73.g11545,Sc4wPfr_73.g11550,Sc4wPfr_807.g11632,Sc4wPfr_730.1.g135,Sc4wPfr_44.1.g12998,Sc4wPfr_540.1.g13235,Sc4wPfr_274.1.g13591,Sc4wPfr_1362.g13667,Sc4wPfr_483.g14149,Sc4wPfr_855.g14404,Sc4wPfr_2145.g14629,Sc4wPfr_635.g14732,Sc4wPfr_618.g14867,Sc4wPfr_1243.g15469,Sc4wPfr_1…	1	1	313056	35	7	1073507	243618	826950	29.162	29.2079	1.473
GO:0051239	regulation of multicellular organismal process	168	Sc4wPfr_1838.g9423,Sc4wPfr_382.g9977,Sc4wPfr_165.g10078,Sc4wPfr_388.1.g10239,Sc4wPfr_524.g10740,Sc4wPfr_524.g10740,Sc4wPfr_309.g10774,Sc4wPfr_309.g10787,Sc4wPfr_5.2.g10991,Sc4wPfr_824.g11302,Sc4wPfr_824.g11305,Sc4wPfr_73.g11516,Sc4wPfr_180.g11682,Sc4wPfr_180.g11685,Sc4wPfr_59.2.g12439,Sc4wPfr_446.g12579,Sc4wPfr_304.2.g12722,Sc4wPfr_1121.g1259,Sc4wPfr_161.1.g12952,Sc4wPfr_896.g13030,Sc4wPfr_2074.g…	88	Sc4wPfr_1838.g9423,Sc4wPfr_165.g10078,Sc4wPfr_388.1.g10239,Sc4wPfr_524.g10740,Sc4wPfr_309.g10774,Sc4wPfr_309.g10787,Sc4wPfr_824.g11302,Sc4wPfr_824.g11305,Sc4wPfr_180.g11682,Sc4wPfr_304.2.g12722,Sc4wPfr_2074.g13182,Sc4wPfr_303.g13698,Sc4wPfr_1177.g14219,Sc4wPfr_1177.g14239,Sc4wPfr_2145.g14585,Sc4wPfr_2145.g14627,Sc4wPfr_635.g14753,Sc4wPfr_365.g14904,Sc4wPfr_365.g14965,Sc4wPfr_1080.g15242,Sc4wPfr_4…	1.0572e-06	6.1317e-05	78269	10	2	286471	61331.8	221568	27.3218	8.34511	1.38405
GO:0072001	renal system development	80	Sc4wPfr_1300.g9829,Sc4wPfr_558.1.g10136,Sc4wPfr_469.1.g10204,Sc4wPfr_469.1.g10204,Sc4wPfr_529.g10437,Sc4wPfr_5.2.g10995,Sc4wPfr_621.g1115,Sc4wPfr_621.g1116,Sc4wPfr_90.g1140,Sc4wPfr_90.g1140,Sc4wPfr_90.g1140,Sc4wPfr_90.g1141,Sc4wPfr_710.1.g1288,Sc4wPfr_303.g13678,Sc4wPfr_303.g13686,Sc4wPfr_303.g13707,Sc4wPfr_168.1.g13893,Sc4wPfr_57.g1483,Sc4wPfr_172.1.g1624,Sc4wPfr_776.g16578,Sc4wPfr_75.2.g17032,S…	26	Sc4wPfr_1300.g9829,Sc4wPfr_529.g10437,Sc4wPfr_621.g1115,Sc4wPfr_621.g1116,Sc4wPfr_90.g1140,Sc4wPfr_168.1.g13893,Sc4wPfr_57.g1483,Sc4wPfr_172.1.g1624,Sc4wPfr_262.2.g17823,Sc4wPfr_1630.1.g20727,Sc4wPfr_1630.1.g20735,Sc4wPfr_478.g21456,Sc4wPfr_42.2.g22110,Sc4wPfr_650.g22985,Sc4wPfr_126.2.g29319,Sc4wPfr_126.2.g29325,Sc4wPfr_115.g30174,Sc4wPfr_363.2.g30360,Sc4wPfr_481.g31585,Sc4wPfr_481.g31586,Sc4wPfr…	0.622244	1	38893	10	2	152327	32458	119360	25.5326	8.34511	1.35969
GO:0001819	positive regulation of cytokine production	154	Sc4wPfr_926.1.g9729,Sc4wPfr_165.g9991,Sc4wPfr_165.g9991,Sc4wPfr_272.g11347,Sc4wPfr_280.g11448,Sc4wPfr_689.g11890,Sc4wPfr_689.g11890,Sc4wPfr_689.g11890,Sc4wPfr_90.g1180,Sc4wPfr_27.g12166,Sc4wPfr_27.g12239,Sc4wPfr_27.g12254,Sc4wPfr_27.g12259,Sc4wPfr_657.g12370,Sc4wPfr_657.g12382,Sc4wPfr_320.g1230,Sc4wPfr_320.g1231,Sc4wPfr_320.g1232,Sc4wPfr_320.g1232,Sc4wPfr_320.g1240,Sc4wPfr_320.g1240,Sc4wPfr_320.g…	65	Sc4wPfr_657.g12370,Sc4wPfr_304.2.g12731,Sc4wPfr_304.2.g12732,Sc4wPfr_304.2.g12747,Sc4wPfr_896.g13017,Sc4wPfr_896.g13018,Sc4wPfr_292.g13058,Sc4wPfr_1844.g14252,Sc4wPfr_643.g14310,Sc4wPfr_514.g14429,Sc4wPfr_646.1.g14654,Sc4wPfr_635.g14759,Sc4wPfr_1802.g15808,Sc4wPfr_17.g15835,Sc4wPfr_467.g16204,Sc4wPfr_467.g16233,Sc4wPfr_42.g17091,Sc4wPfr_26.g17202,Sc4wPfr_26.g17210,Sc4wPfr_519.g18027,Sc4wPfr_13.g1…	0.0234905	0.634242	61686	10	2	251435	52875.2	196380	24.5336	8.34511	1.34626
GO:0048471	perinuclear region of cytoplasm	437	Sc4wPfr_1300.g9812,Sc4wPfr_1300.g9812,Sc4wPfr_1300.g9816,Sc4wPfr_1300.g9816,Sc4wPfr_1300.g9835,Sc4wPfr_1452.g9909,Sc4wPfr_721.1.g9966,Sc4wPfr_165.g10037,Sc4wPfr_165.g10037,Sc4wPfr_165.g10037,Sc4wPfr_165.g10038,Sc4wPfr_165.g10039,Sc4wPfr_165.g10041,Sc4wPfr_469.1.g10205,Sc4wPfr_649.g10292,Sc4wPfr_649.g10292,Sc4wPfr_504.g10324,Sc4wPfr_2233.g10464,Sc4wPfr_552.g10493,Sc4wPfr_103.3.g10565,Sc4wPfr_2313.…	333	Sc4wPfr_1300.g9835,Sc4wPfr_721.1.g9966,Sc4wPfr_165.g10037,Sc4wPfr_165.g10038,Sc4wPfr_165.g10039,Sc4wPfr_165.g10041,Sc4wPfr_469.1.g10205,Sc4wPfr_504.g10324,Sc4wPfr_2233.g10464,Sc4wPfr_552.g10493,Sc4wPfr_103.3.g10565,Sc4wPfr_2313.g10578,Sc4wPfr_158.2.g10598,Sc4wPfr_158.2.g10606,Sc4wPfr_2494.g10696,Sc4wPfr_1909.g11466,Sc4wPfr_174.g11845,Sc4wPfr_328.2.g12071,Sc4wPfr_124.g12362,Sc4wPfr_657.g12371,Sc4w…	2.0703e-71	3.8715e-69	126351	14	3	595623	129550	464594	21.2133	11.8222	1.30129
GO:0030425	dendrite	248	Sc4wPfr_1838.g9425,Sc4wPfr_1838.g9425,Sc4wPfr_307.g9653,Sc4wPfr_1300.g9835,Sc4wPfr_721.1.g9941,Sc4wPfr_388.1.g10263,Sc4wPfr_78.g10410,Sc4wPfr_2616.g10482,Sc4wPfr_309.g10787,Sc4wPfr_696.g10805,Sc4wPfr_2759.g10847,Sc4wPfr_197.g11017,Sc4wPfr_1687.g11205,Sc4wPfr_73.g11515,Sc4wPfr_174.g11794,Sc4wPfr_174.g11799,Sc4wPfr_174.g11799,Sc4wPfr_720.g12305,Sc4wPfr_124.g12368,Sc4wPfr_59.2.g12439,Sc4wPfr_446.g12…	128	Sc4wPfr_307.g9653,Sc4wPfr_1300.g9835,Sc4wPfr_78.g10410,Sc4wPfr_2616.g10482,Sc4wPfr_309.g10787,Sc4wPfr_2759.g10847,Sc4wPfr_73.g11515,Sc4wPfr_174.g11794,Sc4wPfr_174.g11799,Sc4wPfr_446.g12584,Sc4wPfr_828.1.g12777,Sc4wPfr_397.g1305,Sc4wPfr_303.g13729,Sc4wPfr_303.g13732,Sc4wPfr_156.g13800,Sc4wPfr_399.2.g14794,Sc4wPfr_365.g14887,Sc4wPfr_365.g14966,Sc4wPfr_1080.g15228,Sc4wPfr_730.g15332,Sc4wPfr_352.g157…	1.9889e-08	1.432e-06	79670	9	2	381271	82782.7	294860	20.8959	7.64969	1.26339
GO:0003682	chromatin binding	205	Sc4wPfr_85.g928,Sc4wPfr_158.2.g10604,Sc4wPfr_1213.g1084,Sc4wPfr_1213.g1093,Sc4wPfr_569.g11122,Sc4wPfr_174.g11780,Sc4wPfr_174.g11861,Sc4wPfr_328.2.g12071,Sc4wPfr_59.2.g12413,Sc4wPfr_59.2.g12417,Sc4wPfr_59.2.g12417,Sc4wPfr_59.2.g12436,Sc4wPfr_59.2.g12439,Sc4wPfr_59.2.g12442,Sc4wPfr_59.2.g12567,Sc4wPfr_304.2.g12726,Sc4wPfr_304.2.g12727,Sc4wPfr_297.g13156,Sc4wPfr_397.g1300,Sc4wPfr_540.1.g13223,Sc4wPf…	159	Sc4wPfr_85.g928,Sc4wPfr_158.2.g10604,Sc4wPfr_1213.g1084,Sc4wPfr_1213.g1093,Sc4wPfr_569.g11122,Sc4wPfr_174.g11780,Sc4wPfr_174.g11861,Sc4wPfr_328.2.g12071,Sc4wPfr_59.2.g12567,Sc4wPfr_304.2.g12726,Sc4wPfr_304.2.g12727,Sc4wPfr_297.g13156,Sc4wPfr_397.g1300,Sc4wPfr_540.1.g13223,Sc4wPfr_1362.g13664,Sc4wPfr_156.g13811,Sc4wPfr_1844.g14252,Sc4wPfr_32.g14441,Sc4wPfr_32.g14442,Sc4wPfr_32.g14526,Sc4wPfr_32.g1…	7.8142e-37	1.3206e-34	71677	9	2	320421	68524	248915	22.3696	7.64969	1.23881
GO:0045595	regulation of cell differentiation	143	Sc4wPfr_558.1.g10168,Sc4wPfr_388.1.g10239,Sc4wPfr_2313.g10578,Sc4wPfr_923.g11431,Sc4wPfr_923.g11431,Sc4wPfr_73.g11572,Sc4wPfr_2598.g12025,Sc4wPfr_116.2.g12653,Sc4wPfr_729.g12887,Sc4wPfr_161.1.g12939,Sc4wPfr_896.g13030,Sc4wPfr_292.g13083,Sc4wPfr_1505.3.g13299,Sc4wPfr_1177.g14229,Sc4wPfr_1177.g14239,Sc4wPfr_1177.g14239,Sc4wPfr_32.g14567,Sc4wPfr_2145.g14585,Sc4wPfr_2145.g14629,Sc4wPfr_635.g14706,Sc4…	79	Sc4wPfr_558.1.g10168,Sc4wPfr_388.1.g10239,Sc4wPfr_2313.g10578,Sc4wPfr_923.g11431,Sc4wPfr_73.g11572,Sc4wPfr_116.2.g12653,Sc4wPfr_729.g12887,Sc4wPfr_161.1.g12939,Sc4wPfr_292.g13083,Sc4wPfr_1177.g14229,Sc4wPfr_1177.g14239,Sc4wPfr_2145.g14585,Sc4wPfr_2145.g14629,Sc4wPfr_618.g14846,Sc4wPfr_453.g14885,Sc4wPfr_1153.g15524,Sc4wPfr_172.1.g1567,Sc4wPfr_250.g16094,Sc4wPfr_769.g16491,Sc4wPfr_881.g1669,Sc4wPf…	1.9196e-07	1.2198e-05	58175	9	2	244270	52411.7	191176	23.8159	7.64969	1.2337
GO:0003824	catalytic activity	303	Sc4wPfr_177.g9419,Sc4wPfr_177.g9421,Sc4wPfr_307.g9654,Sc4wPfr_662.g963,Sc4wPfr_1300.g9811,Sc4wPfr_1300.g9811,Sc4wPfr_1300.g9823,Sc4wPfr_662.g989,Sc4wPfr_165.g10083,Sc4wPfr_558.1.g10123,Sc4wPfr_558.1.g10145,Sc4wPfr_388.1.g10245,Sc4wPfr_504.g10310,Sc4wPfr_2313.g10577,Sc4wPfr_2313.g10580,Sc4wPfr_178.g10676,Sc4wPfr_5.2.g10966,Sc4wPfr_197.g11018,Sc4wPfr_433.g11148,Sc4wPfr_1213.g1101,Sc4wPfr_180.g11708…	128	Sc4wPfr_177.g9419,Sc4wPfr_177.g9421,Sc4wPfr_1300.g9811,Sc4wPfr_1300.g9823,Sc4wPfr_165.g10083,Sc4wPfr_558.1.g10123,Sc4wPfr_558.1.g10145,Sc4wPfr_2313.g10580,Sc4wPfr_197.g11018,Sc4wPfr_180.g11708,Sc4wPfr_773.g11714,Sc4wPfr_174.g11785,Sc4wPfr_27.g12180,Sc4wPfr_729.g12871,Sc4wPfr_297.g13153,Sc4wPfr_297.g13164,Sc4wPfr_2074.g13184,Sc4wPfr_1584.g13331,Sc4wPfr_1177.g14243,Sc4wPfr_643.g14310,Sc4wPfr_399.2.…	0.00303834	0.106342	138085	13	3	482596	105762	376206	28.613	11.1268	1.21823
GO:0008201	heparin binding	112	Sc4wPfr_85.g947,Sc4wPfr_85.g947,Sc4wPfr_558.1.g10127,Sc4wPfr_558.1.g10127,Sc4wPfr_558.1.g10136,Sc4wPfr_558.1.g10136,Sc4wPfr_707.g10758,Sc4wPfr_707.g10759,Sc4wPfr_5.2.g10955,Sc4wPfr_5.2.g10955,Sc4wPfr_5.2.g10987,Sc4wPfr_5.2.g10990,Sc4wPfr_5.2.g10993,Sc4wPfr_5.2.g10995,Sc4wPfr_109.g11080,Sc4wPfr_621.g1115,Sc4wPfr_621.g1116,Sc4wPfr_73.g11553,Sc4wPfr_90.g1145,Sc4wPfr_90.g1145,Sc4wPfr_90.g1146,Sc4wPfr…	50	Sc4wPfr_85.g947,Sc4wPfr_558.1.g10127,Sc4wPfr_5.2.g10955,Sc4wPfr_5.2.g10987,Sc4wPfr_621.g1115,Sc4wPfr_621.g1116,Sc4wPfr_73.g11553,Sc4wPfr_657.g12379,Sc4wPfr_320.g1229,Sc4wPfr_59.2.g12522,Sc4wPfr_828.1.g12787,Sc4wPfr_828.1.g12788,Sc4wPfr_633.g12810,Sc4wPfr_2890.g12845,Sc4wPfr_32.g14551,Sc4wPfr_399.2.g14795,Sc4wPfr_1483.g15787,Sc4wPfr_1483.g15789,Sc4wPfr_634.1.g17844,Sc4wPfr_634.1.g17845,Sc4wPfr_74.…	0.0123169	0.369507	35469	8	2	184312	39995.5	144106	19.244	6.95426	1.11018
GO:0010557	positive regulation of macromolecule biosynthetic process	117	Sc4wPfr_165.g9991,Sc4wPfr_165.g9991,Sc4wPfr_5.2.g10995,Sc4wPfr_5.2.g10995,Sc4wPfr_197.g11037,Sc4wPfr_621.g1116,Sc4wPfr_824.g11305,Sc4wPfr_90.g1140,Sc4wPfr_144.1.g11742,Sc4wPfr_174.g11859,Sc4wPfr_689.g11898,Sc4wPfr_689.g11898,Sc4wPfr_27.g12239,Sc4wPfr_27.g12254,Sc4wPfr_27.g12259,Sc4wPfr_720.g12316,Sc4wPfr_720.g12316,Sc4wPfr_720.g12316,Sc4wPfr_657.g12382,Sc4wPfr_320.g1230,Sc4wPfr_320.g1231,Sc4wPfr_…	61	Sc4wPfr_621.g1116,Sc4wPfr_824.g11305,Sc4wPfr_90.g1140,Sc4wPfr_689.g11898,Sc4wPfr_720.g12316,Sc4wPfr_896.g13017,Sc4wPfr_896.g13018,Sc4wPfr_1177.g14229,Sc4wPfr_643.g14310,Sc4wPfr_646.1.g14654,Sc4wPfr_635.g14759,Sc4wPfr_250.g16094,Sc4wPfr_467.g16204,Sc4wPfr_467.g16222,Sc4wPfr_26.g17202,Sc4wPfr_519.g18026,Sc4wPfr_519.g18027,Sc4wPfr_8.g18247,Sc4wPfr_13.g18546,Sc4wPfr_10.g18888,Sc4wPfr_2009.g19353,Sc4w…	4.2223e-05	0.00206892	39965	8	2	217583	46618	169301	18.3677	6.95426	1.10143
GO:0010468	regulation of gene expression	157	Sc4wPfr_85.g929,Sc4wPfr_307.g9640,Sc4wPfr_1300.g9829,Sc4wPfr_122.g9870,Sc4wPfr_165.g9991,Sc4wPfr_165.g10088,Sc4wPfr_504.g10378,Sc4wPfr_180.g11704,Sc4wPfr_689.g11897,Sc4wPfr_2598.g12025,Sc4wPfr_657.g12382,Sc4wPfr_320.g1231,Sc4wPfr_320.g1232,Sc4wPfr_320.g1232,Sc4wPfr_320.g1240,Sc4wPfr_320.g1240,Sc4wPfr_320.g1240,Sc4wPfr_828.1.g12790,Sc4wPfr_729.g12873,Sc4wPfr_44.1.g12996,Sc4wPfr_896.g13017,Sc4wPfr_…	86	Sc4wPfr_85.g929,Sc4wPfr_307.g9640,Sc4wPfr_1300.g9829,Sc4wPfr_165.g10088,Sc4wPfr_504.g10378,Sc4wPfr_180.g11704,Sc4wPfr_689.g11897,Sc4wPfr_828.1.g12790,Sc4wPfr_729.g12873,Sc4wPfr_44.1.g12996,Sc4wPfr_896.g13017,Sc4wPfr_896.g13018,Sc4wPfr_423.g13423,Sc4wPfr_303.g13709,Sc4wPfr_756.g14116,Sc4wPfr_514.g14427,Sc4wPfr_2145.g14585,Sc4wPfr_453.g14885,Sc4wPfr_833.g15091,Sc4wPfr_243.g15582,Sc4wPfr_17.g15823,S…	1.0281e-07	6.9914e-06	60019	8	2	319693	68197.2	248939	18.7739	6.95426	1.09581
GO:0005739	mitochondrion	482	Sc4wPfr_307.g9642,Sc4wPfr_1309.1.g9691,Sc4wPfr_516.2.g9734,Sc4wPfr_516.2.g9735,Sc4wPfr_516.2.g9766,Sc4wPfr_516.2.g9767,Sc4wPfr_516.2.g9783,Sc4wPfr_516.2.g9786,Sc4wPfr_721.1.g9967,Sc4wPfr_165.g10045,Sc4wPfr_165.g10084,Sc4wPfr_165.g10084,Sc4wPfr_165.g10084,Sc4wPfr_558.1.g10120,Sc4wPfr_558.1.g10168,Sc4wPfr_388.1.g10262,Sc4wPfr_2233.g10464,Sc4wPfr_2616.g10484,Sc4wPfr_552.g10493,Sc4wPfr_158.2.g10588,S…	380	Sc4wPfr_307.g9642,Sc4wPfr_1309.1.g9691,Sc4wPfr_516.2.g9734,Sc4wPfr_516.2.g9735,Sc4wPfr_516.2.g9766,Sc4wPfr_516.2.g9767,Sc4wPfr_516.2.g9783,Sc4wPfr_516.2.g9786,Sc4wPfr_721.1.g9967,Sc4wPfr_165.g10045,Sc4wPfr_165.g10084,Sc4wPfr_558.1.g10168,Sc4wPfr_388.1.g10262,Sc4wPfr_2233.g10464,Sc4wPfr_2616.g10484,Sc4wPfr_552.g10493,Sc4wPfr_158.2.g10588,Sc4wPfr_158.2.g10606,Sc4wPfr_178.g10640,Sc4wPfr_569.g11122,S…	4.142e-89	8.0354e-87	131667	15	4	572783	124627	443105	22.9872	13.2131	1.05472
GO:0009887	animal organ morphogenesis	195	Sc4wPfr_85.g942,Sc4wPfr_952.1.g9543,Sc4wPfr_85.g947,Sc4wPfr_85.g947,Sc4wPfr_85.g948,Sc4wPfr_307.g9653,Sc4wPfr_1300.g9811,Sc4wPfr_1300.g9811,Sc4wPfr_558.1.g10165,Sc4wPfr_469.1.g10203,Sc4wPfr_504.g10344,Sc4wPfr_504.g10379,Sc4wPfr_78.g10410,Sc4wPfr_158.2.g10589,Sc4wPfr_730.1.g112,Sc4wPfr_1320.g10818,Sc4wPfr_1320.g10819,Sc4wPfr_498.g10897,Sc4wPfr_90.g1135,Sc4wPfr_90.g1136,Sc4wPfr_90.g1174,Sc4wPfr_96.…	102	Sc4wPfr_85.g942,Sc4wPfr_952.1.g9543,Sc4wPfr_85.g947,Sc4wPfr_85.g948,Sc4wPfr_307.g9653,Sc4wPfr_1300.g9811,Sc4wPfr_558.1.g10165,Sc4wPfr_504.g10344,Sc4wPfr_504.g10379,Sc4wPfr_78.g10410,Sc4wPfr_730.1.g112,Sc4wPfr_1320.g10818,Sc4wPfr_1320.g10819,Sc4wPfr_90.g1135,Sc4wPfr_90.g1136,Sc4wPfr_96.g11969,Sc4wPfr_4971.g12128,Sc4wPfr_720.g12274,Sc4wPfr_657.g12370,Sc4wPfr_59.2.g12447,Sc4wPfr_446.g12591,Sc4wPfr_4…	1.906e-07	1.2198e-05	89577	11	3	373766	80526.5	288966	23.9661	9.73597	1.0218
GO:0098590	plasma membrane region	245	Sc4wPfr_1838.g9425,Sc4wPfr_1838.g9425,Sc4wPfr_1594.g9453,Sc4wPfr_1300.g9829,Sc4wPfr_388.1.g10263,Sc4wPfr_504.g10324,Sc4wPfr_616.g10399,Sc4wPfr_552.g10498,Sc4wPfr_158.2.g10590,Sc4wPfr_1320.g10818,Sc4wPfr_498.g10896,Sc4wPfr_102.g11063,Sc4wPfr_272.g11391,Sc4wPfr_73.g11492,Sc4wPfr_73.g11496,Sc4wPfr_73.g11496,Sc4wPfr_73.g11504,Sc4wPfr_73.g11511,Sc4wPfr_73.g11611,Sc4wPfr_73.g11611,Sc4wPfr_174.g11859,Sc…	126	Sc4wPfr_1300.g9829,Sc4wPfr_504.g10324,Sc4wPfr_616.g10399,Sc4wPfr_158.2.g10590,Sc4wPfr_1320.g10818,Sc4wPfr_102.g11063,Sc4wPfr_272.g11391,Sc4wPfr_73.g11492,Sc4wPfr_73.g11496,Sc4wPfr_73.g11504,Sc4wPfr_73.g11511,Sc4wPfr_73.g11611,Sc4wPfr_96.g11930,Sc4wPfr_124.g12341,Sc4wPfr_59.2.g12464,Sc4wPfr_59.2.g12532,Sc4wPfr_446.g12601,Sc4wPfr_1468.g12853,Sc4wPfr_292.g13103,Sc4wPfr_533.g13137,Sc4wPfr_423.g13423,…	3.3171e-08	2.3551e-06	119772	11	3	550472	119314	428666	21.7581	9.73597	1.02057
Strong negative selection (dN/dS<0.1)
GO:0051240	positive regulation of multicellular organismal process	231	Sc4wPfr_122.g9841,Sc4wPfr_388.1.g10236,Sc4wPfr_388.1.g10252,Sc4wPfr_552.g10498,Sc4wPfr_552.g10518,Sc4wPfr_2313.g10580,Sc4wPfr_102.g11062,Sc4wPfr_102.g11063,Sc4wPfr_1687.g11207,Sc4wPfr_351.g11267,Sc4wPfr_351.g11268,Sc4wPfr_351.g11300,Sc4wPfr_351.g11300,Sc4wPfr_272.g11375,Sc4wPfr_773.g11714,Sc4wPfr_773.g11714,Sc4wPfr_174.g11858,Sc4wPfr_96.g12016,Sc4wPfr_27.g12213,Sc4wPfr_124.g12364,Sc4wPfr_446.g125…	139	Sc4wPfr_388.1.g10236,Sc4wPfr_552.g10518,Sc4wPfr_2313.g10580,Sc4wPfr_102.g11062,Sc4wPfr_102.g11063,Sc4wPfr_351.g11267,Sc4wPfr_351.g11268,Sc4wPfr_351.g11300,Sc4wPfr_773.g11714,Sc4wPfr_27.g12213,Sc4wPfr_446.g12580,Sc4wPfr_16.g1266,Sc4wPfr_1747.g1275,Sc4wPfr_896.g13017,Sc4wPfr_292.g13083,Sc4wPfr_292.g13103,Sc4wPfr_999.g13412,Sc4wPfr_1395.g14003,Sc4wPfr_1177.g14229,Sc4wPfr_514.g14422,Sc4wPfr_514.g1442…	1.0912e-15	1.2549e-13	86084	3	9	408514	88023.8	317609	21.0725	8.34511	0.092376

## Sheet: S5 dN dS reference
Supplement Table S5. All examined biological processes under positve and strong negative selection in the comparison of the examined individuals vs. the reference.
#all genes	33820
#all expressed genes	11783
GO_ID	Description	#genes	genes	#expressed_genes_in_pathway	expressed_genes_in_pathway	p_value_more_expressed_than_expected	fdr_more_expressed_than_expected	#covered_bases	nonsynonymous	synonymous	#bases	#synonymous_sites	#nonsynonymous_sites	%covered_bases	#expected_nonsynonymous	dN/dS
Positive selection (dN/dS>1)
GO:0005834	heterotrimeric G-protein complex	16	Sc4wPfr_156.g13800,Sc4wPfr_1080.g15275,Sc4wPfr_172.1.g1596,Sc4wPfr_80.g19937,Sc4wPfr_134.g20098,Sc4wPfr_239.g21117,Sc4wPfr_239.g21119,Sc4wPfr_457.g21409,Sc4wPfr_794.g24589,Sc4wPfr_1806.g25249,Sc4wPfr_199.g28652,Sc4wPfr_290.1.g3112,Sc4wPfr_156.1.g4116,Sc4wPfr_156.1.g4116,Sc4wPfr_175.g6375,Sc4wPfr_1275.g7437	12	Sc4wPfr_156.g13800,Sc4wPfr_80.g19937,Sc4wPfr_134.g20098,Sc4wPfr_239.g21117,Sc4wPfr_239.g21119,Sc4wPfr_457.g21409,Sc4wPfr_794.g24589,Sc4wPfr_199.g28652,Sc4wPfr_290.1.g3112,Sc4wPfr_156.1.g4116,Sc4wPfr_175.g6375,Sc4wPfr_1275.g7437	0.00019326	0.34477	11202	46	10	11283	2481.67	8801.33	99.2821	34.2111	1.29808
Strong negative selection (dN/dS<0.1)
GO:0042118	endothelial cell activation	9	Sc4wPfr_1787.g2666,Sc4wPfr_1495.g2867,Sc4wPfr_363.3.g30478,Sc4wPfr_363.3.g30507,Sc4wPfr_396.g3075,Sc4wPfr_396.g3075,Sc4wPfr_396.g3075,Sc4wPfr_1495.1.g33048,Sc4wPfr_246.g4304	7	Sc4wPfr_1787.g2666,Sc4wPfr_1495.g2867,Sc4wPfr_363.3.g30478,Sc4wPfr_363.3.g30507,Sc4wPfr_396.g3075,Sc4wPfr_1495.1.g33048,Sc4wPfr_246.g4304	0.00134697	1	13977	7	20	14077	3124.5	10924.5	99.2896	16.4946	0.0997178
GO:0030049	muscle filament sliding	14	Sc4wPfr_423.g13470,Sc4wPfr_138.g13929,Sc4wPfr_618.g14865,Sc4wPfr_1556.g21993,Sc4wPfr_1556.g21994,Sc4wPfr_1556.g21995,Sc4wPfr_586.g22381,Sc4wPfr_789.g22426,Sc4wPfr_338.1.g31636,Sc4wPfr_240.g3640,Sc4wPfr_240.g3641,Sc4wPfr_240.g3641,Sc4wPfr_240.g3641,Sc4wPfr_11.g7395	11	Sc4wPfr_423.g13470,Sc4wPfr_138.g13929,Sc4wPfr_618.g14865,Sc4wPfr_1556.g21993,Sc4wPfr_1556.g21994,Sc4wPfr_1556.g21995,Sc4wPfr_586.g22381,Sc4wPfr_789.g22426,Sc4wPfr_338.1.g31636,Sc4wPfr_240.g3641,Sc4wPfr_11.g7395	0.00013374	0.246748	24460	5	13	24621	4893.5	18866.5	99.3461	10.9964	0.0996005
GO:0006911	phagocytosis, engulfment	14	Sc4wPfr_304.2.g12724,Sc4wPfr_274.2.g1521,Sc4wPfr_274.2.g1522,Sc4wPfr_10.g18987,Sc4wPfr_1303.g19230,Sc4wPfr_650.g22990,Sc4wPfr_447.g29015,Sc4wPfr_126.2.g29263,Sc4wPfr_126.2.g29264,Sc4wPfr_1043.g6749,Sc4wPfr_1044.g6845,Sc4wPfr_1044.g6845,Sc4wPfr_1044.g6845,Sc4wPfr_1044.g6845	11	Sc4wPfr_304.2.g12724,Sc4wPfr_274.2.g1521,Sc4wPfr_274.2.g1522,Sc4wPfr_10.g18987,Sc4wPfr_1303.g19230,Sc4wPfr_650.g22990,Sc4wPfr_447.g29015,Sc4wPfr_126.2.g29263,Sc4wPfr_126.2.g29264,Sc4wPfr_1043.g6749,Sc4wPfr_1044.g6845	0.00013374	0.246748	18680	10	27	18870	4004.67	14859.3	98.9931	22.6038	0.099412
GO:0034464	BBSome	11	Sc4wPfr_102.g11064,Sc4wPfr_102.g11068,Sc4wPfr_117.g15492,Sc4wPfr_798.g21007,Sc4wPfr_248.g29615,Sc4wPfr_29.g30067,Sc4wPfr_200.g3515,Sc4wPfr_839.g3985,Sc4wPfr_179.g7829,Sc4wPfr_719.g8339,Sc4wPfr_719.g8343	11	Sc4wPfr_102.g11064,Sc4wPfr_102.g11068,Sc4wPfr_117.g15492,Sc4wPfr_798.g21007,Sc4wPfr_248.g29615,Sc4wPfr_29.g30067,Sc4wPfr_200.g3515,Sc4wPfr_839.g3985,Sc4wPfr_179.g7829,Sc4wPfr_719.g8339,Sc4wPfr_719.g8343	0	0	13678	10	29	13860	3112.83	10747.2	98.6869	23.8256	0.0993166
GO:0070273	phosphatidylinositol-4-phosphate binding	18	Sc4wPfr_124.g12362,Sc4wPfr_483.g14145,Sc4wPfr_489.2.g16692,Sc4wPfr_1163.g25175,Sc4wPfr_319.g27309,Sc4wPfr_199.g28711,Sc4wPfr_208.g28863,Sc4wPfr_208.g28863,Sc4wPfr_886.g29505,Sc4wPfr_1107.1.g29921,Sc4wPfr_1107.1.g29921,Sc4wPfr_715.g30424,Sc4wPfr_707.1.g4124,Sc4wPfr_707.1.g4125,Sc4wPfr_6.1.g650,Sc4wPfr_356.g7051,Sc4wPfr_582.g7501,Sc4wPfr_706.2.g7973	16	Sc4wPfr_124.g12362,Sc4wPfr_483.g14145,Sc4wPfr_489.2.g16692,Sc4wPfr_1163.g25175,Sc4wPfr_319.g27309,Sc4wPfr_199.g28711,Sc4wPfr_208.g28863,Sc4wPfr_886.g29505,Sc4wPfr_1107.1.g29921,Sc4wPfr_715.g30424,Sc4wPfr_707.1.g4124,Sc4wPfr_707.1.g4125,Sc4wPfr_6.1.g650,Sc4wPfr_356.g7051,Sc4wPfr_582.g7501,Sc4wPfr_706.2.g7973	1.9692e-07	0.00052263	24582	10	28	24756	5396	19354	99.2971	23.2147	0.0992627
GO:0006409	tRNA export from nucleus	13	Sc4wPfr_2074.g13185,Sc4wPfr_2074.g13186,Sc4wPfr_1449.g14278,Sc4wPfr_32.g14556,Sc4wPfr_1061.g18814,Sc4wPfr_439.g20749,Sc4wPfr_384.g24856,Sc4wPfr_1269.g30733,Sc4wPfr_502.g33806,Sc4wPfr_62.g4406,Sc4wPfr_62.g4406,Sc4wPfr_177.1.g6206,Sc4wPfr_6.1.g635	12	Sc4wPfr_2074.g13185,Sc4wPfr_2074.g13186,Sc4wPfr_1449.g14278,Sc4wPfr_32.g14556,Sc4wPfr_1061.g18814,Sc4wPfr_439.g20749,Sc4wPfr_384.g24856,Sc4wPfr_1269.g30733,Sc4wPfr_502.g33806,Sc4wPfr_62.g4406,Sc4wPfr_177.1.g6206,Sc4wPfr_6.1.g635	1.1097e-06	0.00279638	12243	8	22	12450	2679.17	9770.83	98.3373	18.3274	0.0992166
GO:0010992	ubiquitin recycling	8	Sc4wPfr_1213.g1096,Sc4wPfr_17.g15877,Sc4wPfr_232.g4546,Sc4wPfr_232.g4546,Sc4wPfr_232.g4547,Sc4wPfr_253.1.g5542,Sc4wPfr_377.g77,Sc4wPfr_910.1.g9187	6	Sc4wPfr_1213.g1096,Sc4wPfr_17.g15877,Sc4wPfr_232.g4547,Sc4wPfr_253.1.g5542,Sc4wPfr_377.g77,Sc4wPfr_910.1.g9187	0.00346188	1	10094	12	33	10308	2220.17	8087.83	97.9239	27.4911	0.0989262
GO:0000060	protein import into nucleus, translocation	15	Sc4wPfr_146.g12058,Sc4wPfr_633.g12806,Sc4wPfr_87.g16553,Sc4wPfr_275.3.g1976,Sc4wPfr_275.3.g1987,Sc4wPfr_1241.g21489,Sc4wPfr_2124.g26585,Sc4wPfr_226.1.g26815,Sc4wPfr_282.g29640,Sc4wPfr_638.g29683,Sc4wPfr_279.g30465,Sc4wPfr_263.1.g30951,Sc4wPfr_224.1.g33421,Sc4wPfr_224.1.g33437,Sc4wPfr_502.g33806	13	Sc4wPfr_146.g12058,Sc4wPfr_633.g12806,Sc4wPfr_87.g16553,Sc4wPfr_275.3.g1987,Sc4wPfr_2124.g26585,Sc4wPfr_226.1.g26815,Sc4wPfr_282.g29640,Sc4wPfr_638.g29683,Sc4wPfr_279.g30465,Sc4wPfr_263.1.g30951,Sc4wPfr_224.1.g33421,Sc4wPfr_224.1.g33437,Sc4wPfr_502.g33806	3.9121e-06	0.00928339	18653	8	23	18816	4176.17	14639.8	99.1337	18.9383	0.0988923
GO:0017091	AU-rich element binding	8	Sc4wPfr_177.g9411,Sc4wPfr_1309.1.g9692,Sc4wPfr_274.1.g13600,Sc4wPfr_251.g2482,Sc4wPfr_149.g26106,Sc4wPfr_691.g31328,Sc4wPfr_920.g435,Sc4wPfr_85.g891	8	Sc4wPfr_177.g9411,Sc4wPfr_1309.1.g9692,Sc4wPfr_274.1.g13600,Sc4wPfr_251.g2482,Sc4wPfr_149.g26106,Sc4wPfr_691.g31328,Sc4wPfr_920.g435,Sc4wPfr_85.g891	0	0	12543	8	23	12636	2808	9828	99.264	18.9383	0.0988889
GO:0006406	mRNA export from nucleus	85	Sc4wPfr_558.1.g10131,Sc4wPfr_351.g11270,Sc4wPfr_322.g12149,Sc4wPfr_322.g12149,Sc4wPfr_322.g12150,Sc4wPfr_2074.g13185,Sc4wPfr_2074.g13186,Sc4wPfr_3075.g13311,Sc4wPfr_3075.g13313,Sc4wPfr_423.g13471,Sc4wPfr_1402.g13900,Sc4wPfr_1402.g13903,Sc4wPfr_1449.g14278,Sc4wPfr_32.g14556,Sc4wPfr_244.2.g15111,Sc4wPfr_572.g15444,Sc4wPfr_489.2.g16677,Sc4wPfr_26.g17283,Sc4wPfr_1061.g18814,Sc4wPfr_10.g18921,Sc4wPfr_…	73	Sc4wPfr_558.1.g10131,Sc4wPfr_351.g11270,Sc4wPfr_322.g12149,Sc4wPfr_322.g12150,Sc4wPfr_2074.g13185,Sc4wPfr_2074.g13186,Sc4wPfr_3075.g13311,Sc4wPfr_3075.g13313,Sc4wPfr_423.g13471,Sc4wPfr_1402.g13900,Sc4wPfr_1402.g13903,Sc4wPfr_1449.g14278,Sc4wPfr_32.g14556,Sc4wPfr_244.2.g15111,Sc4wPfr_572.g15444,Sc4wPfr_489.2.g16677,Sc4wPfr_26.g17283,Sc4wPfr_1061.g18814,Sc4wPfr_761.g1927,Sc4wPfr_1085.g19567,Sc4wPfr…	2.3819e-23	8.0128e-20	81837	39	111	82531	18133.8	64195.2	99.1591	91.6369	0.0988841
GO:0005587	collagen type IV trimer	5	Sc4wPfr_272.g11351,Sc4wPfr_272.g11355,Sc4wPfr_773.g11731,Sc4wPfr_455.g20399,Sc4wPfr_177.1.g6209	4	Sc4wPfr_272.g11351,Sc4wPfr_272.g11355,Sc4wPfr_455.g20399,Sc4wPfr_177.1.g6209	0.00513064	1	10068	6	19	10284	2459.33	7824.67	97.8996	15.2728	0.0987927
GO:0046578	regulation of Ras protein signal transduction	15	Sc4wPfr_1687.g11206,Sc4wPfr_1687.g11206,Sc4wPfr_17.g15897,Sc4wPfr_347.g19345,Sc4wPfr_347.g19345,Sc4wPfr_347.g19345,Sc4wPfr_347.g19345,Sc4wPfr_107.1.g20615,Sc4wPfr_650.g22968,Sc4wPfr_650.g22968,Sc4wPfr_106.g23559,Sc4wPfr_952.g24542,Sc4wPfr_447.g29020,Sc4wPfr_363.3.g30536,Sc4wPfr_363.3.g30536	9	Sc4wPfr_1687.g11206,Sc4wPfr_17.g15897,Sc4wPfr_347.g19345,Sc4wPfr_107.1.g20615,Sc4wPfr_650.g22968,Sc4wPfr_106.g23559,Sc4wPfr_952.g24542,Sc4wPfr_447.g29020,Sc4wPfr_363.3.g30536	0.0119947	1	20782	10	28	20915	4520.33	16296.7	99.3641	23.2147	0.0986942
GO:0048706	embryonic skeletal system development	17	Sc4wPfr_174.g11780,Sc4wPfr_213.g1320,Sc4wPfr_634.1.g17844,Sc4wPfr_634.1.g17845,Sc4wPfr_424.1.g2106,Sc4wPfr_424.1.g2106,Sc4wPfr_1241.g21489,Sc4wPfr_338.g25884,Sc4wPfr_2124.g26585,Sc4wPfr_287.2.g28262,Sc4wPfr_1975.g29182,Sc4wPfr_48.g30209,Sc4wPfr_48.g30211,Sc4wPfr_381.1.g32290,Sc4wPfr_826.g32481,Sc4wPfr_224.1.g33422,Sc4wPfr_440.g6790	14	Sc4wPfr_174.g11780,Sc4wPfr_213.g1320,Sc4wPfr_634.1.g17844,Sc4wPfr_634.1.g17845,Sc4wPfr_424.1.g2106,Sc4wPfr_338.g25884,Sc4wPfr_2124.g26585,Sc4wPfr_287.2.g28262,Sc4wPfr_1975.g29182,Sc4wPfr_48.g30209,Sc4wPfr_48.g30211,Sc4wPfr_381.1.g32290,Sc4wPfr_224.1.g33422,Sc4wPfr_440.g6790	8.3081e-06	0.0191336	25735	10	28	25902	5618.17	20283.8	99.3553	23.2147	0.0986239
GO:0070573	metallodipeptidase activity	7	Sc4wPfr_27.g12183,Sc4wPfr_27.g12187,Sc4wPfr_347.g19291,Sc4wPfr_391.g24681,Sc4wPfr_391.g24681,Sc4wPfr_1660.g31972,Sc4wPfr_253.1.g5548	6	Sc4wPfr_27.g12183,Sc4wPfr_27.g12187,Sc4wPfr_347.g19291,Sc4wPfr_391.g24681,Sc4wPfr_1660.g31972,Sc4wPfr_253.1.g5548	0.0006224	0.964724	12937	6	17	13047	2835.17	10211.8	99.1569	14.051	0.097635
GO:0035235	ionotropic glutamate receptor signaling pathway	16	Sc4wPfr_416.g17198,Sc4wPfr_416.g17198,Sc4wPfr_416.g17198,Sc4wPfr_602.g18711,Sc4wPfr_106.g23472,Sc4wPfr_4146.g26959,Sc4wPfr_98.g2686,Sc4wPfr_98.g2699,Sc4wPfr_98.g2700,Sc4wPfr_759.g27583,Sc4wPfr_363.2.g30343,Sc4wPfr_396.g3015,Sc4wPfr_830.g6317,Sc4wPfr_830.g6318,Sc4wPfr_830.g6319,Sc4wPfr_830.g6320	14	Sc4wPfr_416.g17198,Sc4wPfr_602.g18711,Sc4wPfr_106.g23472,Sc4wPfr_4146.g26959,Sc4wPfr_98.g2686,Sc4wPfr_98.g2699,Sc4wPfr_98.g2700,Sc4wPfr_759.g27583,Sc4wPfr_363.2.g30343,Sc4wPfr_396.g3015,Sc4wPfr_830.g6317,Sc4wPfr_830.g6318,Sc4wPfr_830.g6319,Sc4wPfr_830.g6320	1.4496e-06	0.00360381	22964	22	66	23119	5258.5	17841.5	99.3296	53.7603	0.0975005
GO:0006342	chromatin silencing	19	Sc4wPfr_2313.g10581,Sc4wPfr_433.g11147,Sc4wPfr_433.g11154,Sc4wPfr_174.g11790,Sc4wPfr_467.g16214,Sc4wPfr_1061.g18810,Sc4wPfr_1061.g18811,Sc4wPfr_10.g18978,Sc4wPfr_354.g19208,Sc4wPfr_187.g1960,Sc4wPfr_650.g22963,Sc4wPfr_199.g28685,Sc4wPfr_506.2.g28741,Sc4wPfr_488.g29966,Sc4wPfr_24.g32543,Sc4wPfr_24.g32544,Sc4wPfr_173.2.g33018,Sc4wPfr_1416.g33246,Sc4wPfr_45.g3331	12	Sc4wPfr_2313.g10581,Sc4wPfr_467.g16214,Sc4wPfr_1061.g18810,Sc4wPfr_1061.g18811,Sc4wPfr_354.g19208,Sc4wPfr_187.g1960,Sc4wPfr_650.g22963,Sc4wPfr_199.g28685,Sc4wPfr_506.2.g28741,Sc4wPfr_173.2.g33018,Sc4wPfr_1416.g33246,Sc4wPfr_45.g3331	0.00294578	1	20913	25	74	21018	4739.17	16278.8	99.5004	60.4803	0.0974252
GO:0071782	endoplasmic reticulum tubular network	11	Sc4wPfr_641.g16841,Sc4wPfr_275.3.g1987,Sc4wPfr_439.g20897,Sc4wPfr_846.1.g25646,Sc4wPfr_353.g28148,Sc4wPfr_624.g29809,Sc4wPfr_691.g31315,Sc4wPfr_296.g32345,Sc4wPfr_594.g3248,Sc4wPfr_844.g33352,Sc4wPfr_1.g5785	11	Sc4wPfr_641.g16841,Sc4wPfr_275.3.g1987,Sc4wPfr_439.g20897,Sc4wPfr_846.1.g25646,Sc4wPfr_353.g28148,Sc4wPfr_624.g29809,Sc4wPfr_691.g31315,Sc4wPfr_296.g32345,Sc4wPfr_594.g3248,Sc4wPfr_844.g33352,Sc4wPfr_1.g5785	0	0	13487	6	17	13644	2959.5	10684.5	98.8493	14.051	0.0974228
GO:0005847	mRNA cleavage and polyadenylation specificity factor complex	18	Sc4wPfr_307.g9664,Sc4wPfr_44.1.g12993,Sc4wPfr_44.1.g12994,Sc4wPfr_1402.g13900,Sc4wPfr_1402.g13903,Sc4wPfr_523.g16385,Sc4wPfr_328.g18065,Sc4wPfr_39.g20538,Sc4wPfr_39.g20538,Sc4wPfr_39.g20540,Sc4wPfr_106.g23612,Sc4wPfr_56.g24500,Sc4wPfr_463.g30896,Sc4wPfr_856.g31442,Sc4wPfr_290.1.g3138,Sc4wPfr_62.g4412,Sc4wPfr_492.2.g528,Sc4wPfr_16.1.g8481	17	Sc4wPfr_307.g9664,Sc4wPfr_44.1.g12993,Sc4wPfr_44.1.g12994,Sc4wPfr_1402.g13900,Sc4wPfr_1402.g13903,Sc4wPfr_523.g16385,Sc4wPfr_328.g18065,Sc4wPfr_39.g20538,Sc4wPfr_39.g20540,Sc4wPfr_106.g23612,Sc4wPfr_56.g24500,Sc4wPfr_463.g30896,Sc4wPfr_856.g31442,Sc4wPfr_290.1.g3138,Sc4wPfr_62.g4412,Sc4wPfr_492.2.g528,Sc4wPfr_16.1.g8481	5.6729e-09	1.6276e-05	20317	10	29	20481	4518.83	15962.2	99.1993	23.8256	0.0972418
GO:0004012	phospholipid-translocating ATPase activity	11	Sc4wPfr_351.g11266,Sc4wPfr_351.g11267,Sc4wPfr_351.g11268,Sc4wPfr_272.g11400,Sc4wPfr_274.2.g1521,Sc4wPfr_274.2.g1522,Sc4wPfr_274.2.g1534,Sc4wPfr_622.g24268,Sc4wPfr_65.g31696,Sc4wPfr_458.g6406,Sc4wPfr_356.g7086	10	Sc4wPfr_351.g11266,Sc4wPfr_351.g11267,Sc4wPfr_351.g11268,Sc4wPfr_272.g11400,Sc4wPfr_274.2.g1521,Sc4wPfr_274.2.g1522,Sc4wPfr_274.2.g1534,Sc4wPfr_65.g31696,Sc4wPfr_458.g6406,Sc4wPfr_356.g7086	9.1534e-06	0.0208607	20779	13	38	21036	4672.67	16363.3	98.7783	31.1565	0.0972115
GO:0009405	pathogenesis	33	Sc4wPfr_102.g11058,Sc4wPfr_1909.g11468,Sc4wPfr_73.g11563,Sc4wPfr_635.g14731,Sc4wPfr_104.g15029,Sc4wPfr_1091.g16428,Sc4wPfr_1091.g16428,Sc4wPfr_776.g16570,Sc4wPfr_776.g16571,Sc4wPfr_958.g18785,Sc4wPfr_958.g18787,Sc4wPfr_354.g19208,Sc4wPfr_134.g20082,Sc4wPfr_134.g20086,Sc4wPfr_977.1.g21529,Sc4wPfr_977.g21613,Sc4wPfr_42.2.g22105,Sc4wPfr_52.g22756,Sc4wPfr_52.g22759,Sc4wPfr_1073.g23691,Sc4wPfr_794.g24…	22	Sc4wPfr_102.g11058,Sc4wPfr_73.g11563,Sc4wPfr_635.g14731,Sc4wPfr_104.g15029,Sc4wPfr_1091.g16428,Sc4wPfr_958.g18785,Sc4wPfr_958.g18787,Sc4wPfr_354.g19208,Sc4wPfr_134.g20082,Sc4wPfr_134.g20086,Sc4wPfr_977.1.g21529,Sc4wPfr_977.g21613,Sc4wPfr_42.2.g22105,Sc4wPfr_52.g22756,Sc4wPfr_1073.g23691,Sc4wPfr_794.g24574,Sc4wPfr_759.g27633,Sc4wPfr_208.g28863,Sc4wPfr_1214.g29727,Sc4wPfr_628.g32849,Sc4wPfr_224.1.g…	4.7381e-05	0.0961364	27526	14	40	27962	6032	21637	98.4407	32.9893	0.0971835
GO:0019887	protein kinase regulator activity	10	Sc4wPfr_1213.g1084,Sc4wPfr_27.g12218,Sc4wPfr_116.g14685,Sc4wPfr_618.g14846,Sc4wPfr_181.g16639,Sc4wPfr_788.g26563,Sc4wPfr_582.g7539,Sc4wPfr_289.1.g8521,Sc4wPfr_289.1.g8528,Sc4wPfr_85.g925	9	Sc4wPfr_1213.g1084,Sc4wPfr_27.g12218,Sc4wPfr_116.g14685,Sc4wPfr_618.g14846,Sc4wPfr_181.g16639,Sc4wPfr_788.g26563,Sc4wPfr_289.1.g8521,Sc4wPfr_289.1.g8528,Sc4wPfr_85.g925	2.6287e-05	0.0563331	11811	20	57	11865	2597	9268	99.5449	47.0403	0.0970137
GO:0045444	fat cell differentiation	27	Sc4wPfr_85.g928,Sc4wPfr_102.g11064,Sc4wPfr_102.g11068,Sc4wPfr_124.g12357,Sc4wPfr_117.g15492,Sc4wPfr_1091.g16442,Sc4wPfr_14.g1781,Sc4wPfr_14.g1836,Sc4wPfr_6.g19151,Sc4wPfr_255.g21685,Sc4wPfr_424.1.g2140,Sc4wPfr_118.g25120,Sc4wPfr_545.g26036,Sc4wPfr_319.g27364,Sc4wPfr_372.g28037,Sc4wPfr_208.g28863,Sc4wPfr_208.g28863,Sc4wPfr_886.g29505,Sc4wPfr_886.g29507,Sc4wPfr_248.g29621,Sc4wPfr_488.g29970,Sc4wPfr…	24	Sc4wPfr_85.g928,Sc4wPfr_102.g11064,Sc4wPfr_102.g11068,Sc4wPfr_124.g12357,Sc4wPfr_117.g15492,Sc4wPfr_1091.g16442,Sc4wPfr_14.g1781,Sc4wPfr_6.g19151,Sc4wPfr_255.g21685,Sc4wPfr_424.1.g2140,Sc4wPfr_118.g25120,Sc4wPfr_545.g26036,Sc4wPfr_319.g27364,Sc4wPfr_372.g28037,Sc4wPfr_208.g28863,Sc4wPfr_886.g29505,Sc4wPfr_886.g29507,Sc4wPfr_248.g29621,Sc4wPfr_488.g29970,Sc4wPfr_224.1.g33421,Sc4wPfr_909.g33493,Sc4…	5.452e-10	1.6083e-06	35069	20	57	35292	7664.67	27609.3	99.3681	47.0403	0.0969706
GO:0005669	transcription factor TFIID complex	18	Sc4wPfr_504.g10327,Sc4wPfr_504.g10328,Sc4wPfr_73.g11555,Sc4wPfr_720.g12290,Sc4wPfr_354.g19210,Sc4wPfr_275.3.g1993,Sc4wPfr_2949.g24290,Sc4wPfr_384.g24895,Sc4wPfr_57.2.g24937,Sc4wPfr_1327.g275,Sc4wPfr_372.g28025,Sc4wPfr_1969.g28113,Sc4wPfr_29.g30028,Sc4wPfr_481.g31596,Sc4wPfr_248.3.g3455,Sc4wPfr_390.g5620,Sc4wPfr_582.g7516,Sc4wPfr_371.g8131	18	Sc4wPfr_504.g10327,Sc4wPfr_504.g10328,Sc4wPfr_73.g11555,Sc4wPfr_720.g12290,Sc4wPfr_354.g19210,Sc4wPfr_275.3.g1993,Sc4wPfr_2949.g24290,Sc4wPfr_384.g24895,Sc4wPfr_57.2.g24937,Sc4wPfr_1327.g275,Sc4wPfr_372.g28025,Sc4wPfr_1969.g28113,Sc4wPfr_29.g30028,Sc4wPfr_481.g31596,Sc4wPfr_248.3.g3455,Sc4wPfr_390.g5620,Sc4wPfr_582.g7516,Sc4wPfr_371.g8131	0	0	22143	14	40	22320	4860.17	17459.8	99.207	32.9893	0.0969432
GO:0030073	insulin secretion	15	Sc4wPfr_178.g10615,Sc4wPfr_457.1.g10725,Sc4wPfr_921.g15158,Sc4wPfr_416.g17198,Sc4wPfr_416.g17198,Sc4wPfr_347.g19272,Sc4wPfr_95.2.g19508,Sc4wPfr_95.2.g19508,Sc4wPfr_251.g2490,Sc4wPfr_3539.g26087,Sc4wPfr_137.g27953,Sc4wPfr_246.g4301,Sc4wPfr_62.g4503,Sc4wPfr_325.1.g5377,Sc4wPfr_147.g8553	7	Sc4wPfr_457.1.g10725,Sc4wPfr_416.g17198,Sc4wPfr_95.2.g19508,Sc4wPfr_251.g2490,Sc4wPfr_137.g27953,Sc4wPfr_246.g4301,Sc4wPfr_325.1.g5377	0.110607	1	11145	9	26	11455	2513.67	8922.33	97.2938	21.3819	0.0969122
GO:0090575	RNA polymerase II transcription factor complex	21	Sc4wPfr_178.g10615,Sc4wPfr_921.g15158,Sc4wPfr_352.g15734,Sc4wPfr_769.g16491,Sc4wPfr_224.g18100,Sc4wPfr_507.g18571,Sc4wPfr_347.g19287,Sc4wPfr_439.g20911,Sc4wPfr_135.g21755,Sc4wPfr_251.g2490,Sc4wPfr_3539.g26087,Sc4wPfr_1787.g2666,Sc4wPfr_364.g29945,Sc4wPfr_715.g30425,Sc4wPfr_396.g3034,Sc4wPfr_948.g31562,Sc4wPfr_884.g31954,Sc4wPfr_826.g32465,Sc4wPfr_246.g4301,Sc4wPfr_147.g8553,Sc4wPfr_147.g8607	13	Sc4wPfr_769.g16491,Sc4wPfr_224.g18100,Sc4wPfr_507.g18571,Sc4wPfr_347.g19287,Sc4wPfr_439.g20911,Sc4wPfr_251.g2490,Sc4wPfr_1787.g2666,Sc4wPfr_715.g30425,Sc4wPfr_396.g3034,Sc4wPfr_884.g31954,Sc4wPfr_826.g32465,Sc4wPfr_246.g4301,Sc4wPfr_147.g8607	0.00293814	1	20574	9	26	20689	4518.33	16139.7	99.4441	21.3819	0.0965702
GO:0006768	biotin metabolic process	12	Sc4wPfr_926.1.g9731,Sc4wPfr_796.1.g11008,Sc4wPfr_272.g11397,Sc4wPfr_670.1.g22780,Sc4wPfr_670.1.g22782,Sc4wPfr_802.2.g33135,Sc4wPfr_62.g4455,Sc4wPfr_62.g4457,Sc4wPfr_62.g4458,Sc4wPfr_312.g4835,Sc4wPfr_290.g6586,Sc4wPfr_16.1.g8482	12	Sc4wPfr_926.1.g9731,Sc4wPfr_796.1.g11008,Sc4wPfr_272.g11397,Sc4wPfr_670.1.g22780,Sc4wPfr_670.1.g22782,Sc4wPfr_802.2.g33135,Sc4wPfr_62.g4455,Sc4wPfr_62.g4457,Sc4wPfr_62.g4458,Sc4wPfr_312.g4835,Sc4wPfr_290.g6586,Sc4wPfr_16.1.g8482	0	0	22107	22	67	22276	5086.83	17161.2	99.2413	54.3712	0.0965558
GO:0005719	nuclear euchromatin	17	Sc4wPfr_96.g11983,Sc4wPfr_119.1.g1450,Sc4wPfr_945.g15378,Sc4wPfr_769.g16491,Sc4wPfr_221.g17485,Sc4wPfr_255.g21685,Sc4wPfr_68.g2328,Sc4wPfr_3990.g27741,Sc4wPfr_82.1.g28984,Sc4wPfr_29.g30028,Sc4wPfr_363.2.g30370,Sc4wPfr_481.g31582,Sc4wPfr_24.g32541,Sc4wPfr_24.g32542,Sc4wPfr_173.2.g33018,Sc4wPfr_1394.g4669,Sc4wPfr_975.g7262	13	Sc4wPfr_119.1.g1450,Sc4wPfr_945.g15378,Sc4wPfr_769.g16491,Sc4wPfr_221.g17485,Sc4wPfr_255.g21685,Sc4wPfr_68.g2328,Sc4wPfr_82.1.g28984,Sc4wPfr_29.g30028,Sc4wPfr_363.2.g30370,Sc4wPfr_481.g31582,Sc4wPfr_173.2.g33018,Sc4wPfr_1394.g4669,Sc4wPfr_975.g7262	8.1074e-05	0.154528	14192	6	18	14343	3228.33	11114.7	98.9472	14.6619	0.0964934
GO:0001618	virus receptor activity	9	Sc4wPfr_347.g19291,Sc4wPfr_131.1.g19981,Sc4wPfr_135.g21758,Sc4wPfr_639.g22941,Sc4wPfr_639.g22946,Sc4wPfr_289.g2548,Sc4wPfr_1660.g31972,Sc4wPfr_253.1.g5548,Sc4wPfr_289.1.g8521	9	Sc4wPfr_347.g19291,Sc4wPfr_131.1.g19981,Sc4wPfr_135.g21758,Sc4wPfr_639.g22941,Sc4wPfr_639.g22946,Sc4wPfr_289.g2548,Sc4wPfr_1660.g31972,Sc4wPfr_253.1.g5548,Sc4wPfr_289.1.g8521	0	0	14158	21	60	14214	3097.17	11116.8	99.606	49.4839	0.0963671
GO:0010827	regulation of glucose transmembrane transport	12	Sc4wPfr_2074.g13185,Sc4wPfr_2074.g13186,Sc4wPfr_1449.g14278,Sc4wPfr_32.g14556,Sc4wPfr_1061.g18814,Sc4wPfr_439.g20749,Sc4wPfr_1269.g30733,Sc4wPfr_62.g4406,Sc4wPfr_62.g4406,Sc4wPfr_177.1.g6206,Sc4wPfr_6.1.g635,Sc4wPfr_582.g7503	11	Sc4wPfr_2074.g13185,Sc4wPfr_2074.g13186,Sc4wPfr_1449.g14278,Sc4wPfr_32.g14556,Sc4wPfr_1061.g18814,Sc4wPfr_439.g20749,Sc4wPfr_1269.g30733,Sc4wPfr_62.g4406,Sc4wPfr_177.1.g6206,Sc4wPfr_6.1.g635,Sc4wPfr_582.g7503	3.1871e-06	0.00772563	11450	7	20	11638	2512.17	9085.83	98.3846	16.4946	0.0963074
GO:0009975	cyclase activity	4	Sc4wPfr_27.g12232,Sc4wPfr_250.g16066,Sc4wPfr_1172.g28458,Sc4wPfr_481.g31597	4	Sc4wPfr_27.g12232,Sc4wPfr_250.g16066,Sc4wPfr_1172.g28458,Sc4wPfr_481.g31597	0	0	13006	12	34	13152	2833.33	10318.7	98.8899	28.102	0.096209
GO:0016849	phosphorus-oxygen lyase activity	4	Sc4wPfr_27.g12232,Sc4wPfr_250.g16066,Sc4wPfr_1172.g28458,Sc4wPfr_481.g31597	4	Sc4wPfr_27.g12232,Sc4wPfr_250.g16066,Sc4wPfr_1172.g28458,Sc4wPfr_481.g31597	0	0	13006	12	34	13152	2833.33	10318.7	98.8899	28.102	0.096209
GO:0001221	transcription cofactor binding	6	Sc4wPfr_255.g21685,Sc4wPfr_113.1.g28368,Sc4wPfr_909.g33493,Sc4wPfr_909.g33493,Sc4wPfr_1514.g5393,Sc4wPfr_1514.g5394	5	Sc4wPfr_255.g21685,Sc4wPfr_113.1.g28368,Sc4wPfr_909.g33493,Sc4wPfr_1514.g5393,Sc4wPfr_1514.g5394	0.00178704	1	13586	10	28	13629	2897.33	10719.7	99.6845	23.2147	0.0959657
GO:0048538	thymus development	11	Sc4wPfr_165.g10051,Sc4wPfr_504.g10336,Sc4wPfr_635.g14695,Sc4wPfr_275.3.g1976,Sc4wPfr_1241.g21489,Sc4wPfr_2124.g26585,Sc4wPfr_226.1.g26815,Sc4wPfr_264.g27405,Sc4wPfr_1495.g2867,Sc4wPfr_628.g32849,Sc4wPfr_201.1.g33280	8	Sc4wPfr_165.g10051,Sc4wPfr_504.g10336,Sc4wPfr_635.g14695,Sc4wPfr_2124.g26585,Sc4wPfr_226.1.g26815,Sc4wPfr_1495.g2867,Sc4wPfr_628.g32849,Sc4wPfr_201.1.g33280	0.00196131	1	13491	9	26	13569	2957.5	10611.5	99.4252	21.3819	0.0959633
GO:0035025	positive regulation of Rho protein signal transduction	7	Sc4wPfr_788.g26563,Sc4wPfr_372.g28038,Sc4wPfr_372.g28040,Sc4wPfr_290.1.g3112,Sc4wPfr_246.g4308,Sc4wPfr_246.g4308,Sc4wPfr_1618.g5152	5	Sc4wPfr_788.g26563,Sc4wPfr_372.g28040,Sc4wPfr_290.1.g3112,Sc4wPfr_246.g4308,Sc4wPfr_1618.g5152	0.00877484	1	11811	6	17	11922	2547.33	9374.67	99.0689	14.051	0.0955165
GO:0000386	second spliceosomal transesterification activity	5	Sc4wPfr_2494.g10705,Sc4wPfr_3075.g13311,Sc4wPfr_3075.g13313,Sc4wPfr_372.g27961,Sc4wPfr_372.g27963	5	Sc4wPfr_2494.g10705,Sc4wPfr_3075.g13311,Sc4wPfr_3075.g13313,Sc4wPfr_372.g27961,Sc4wPfr_372.g27963	0	0	11053	3	9	11124	2469.17	8654.83	99.3617	7.33095	0.0948885
GO:0070938	contractile ring	12	Sc4wPfr_618.g14858,Sc4wPfr_547.1.g24950,Sc4wPfr_547.1.g24951,Sc4wPfr_547.1.g24951,Sc4wPfr_248.g29623,Sc4wPfr_628.g32827,Sc4wPfr_240.g3640,Sc4wPfr_240.g3640,Sc4wPfr_240.g3641,Sc4wPfr_240.g3641,Sc4wPfr_240.g3641,Sc4wPfr_839.g3999	7	Sc4wPfr_618.g14858,Sc4wPfr_547.1.g24950,Sc4wPfr_547.1.g24951,Sc4wPfr_248.g29623,Sc4wPfr_628.g32827,Sc4wPfr_240.g3641,Sc4wPfr_839.g3999	0.0247684	1	22313	12	33	22457	4467.17	17060.8	99.3588	27.4911	0.0947884
GO:0051988	regulation of attachment of spindle microtubules to kinetochore	8	Sc4wPfr_618.g14846,Sc4wPfr_275.3.g1981,Sc4wPfr_275.3.g1981,Sc4wPfr_977.1.g21529,Sc4wPfr_588.g23878,Sc4wPfr_169.g29115,Sc4wPfr_169.g29115,Sc4wPfr_194.g32429	5	Sc4wPfr_618.g14846,Sc4wPfr_977.1.g21529,Sc4wPfr_588.g23878,Sc4wPfr_169.g29115,Sc4wPfr_194.g32429	0.0247137	1	14410	5	15	14484	3165.5	11132.5	99.4891	12.2182	0.0945111
GO:0009267	cellular response to starvation	48	Sc4wPfr_469.1.g10205,Sc4wPfr_1114.g10933,Sc4wPfr_73.g11515,Sc4wPfr_945.g15378,Sc4wPfr_326.g15676,Sc4wPfr_182.1.g16257,Sc4wPfr_182.1.g16274,Sc4wPfr_1007.1.g17167,Sc4wPfr_854.g18429,Sc4wPfr_854.g18429,Sc4wPfr_854.g18433,Sc4wPfr_422.g20156,Sc4wPfr_422.g20290,Sc4wPfr_439.g20845,Sc4wPfr_899.g22610,Sc4wPfr_106.g23487,Sc4wPfr_804.g24126,Sc4wPfr_412.g24335,Sc4wPfr_384.g24880,Sc4wPfr_182.g26069,Sc4wPfr_37…	37	Sc4wPfr_469.1.g10205,Sc4wPfr_1114.g10933,Sc4wPfr_73.g11515,Sc4wPfr_945.g15378,Sc4wPfr_326.g15676,Sc4wPfr_182.1.g16257,Sc4wPfr_182.1.g16274,Sc4wPfr_439.g20845,Sc4wPfr_899.g22610,Sc4wPfr_106.g23487,Sc4wPfr_804.g24126,Sc4wPfr_412.g24335,Sc4wPfr_384.g24880,Sc4wPfr_374.g2609,Sc4wPfr_627.g26940,Sc4wPfr_319.g27330,Sc4wPfr_319.g27334,Sc4wPfr_319.g27338,Sc4wPfr_199.g28669,Sc4wPfr_199.g28670,Sc4wPfr_199.g2…	4.0251e-10	1.1914e-06	65610	117	341	66036	14387.8	51501.2	99.3549	279.798	0.0944744
GO:0006491	N-glycan processing	6	Sc4wPfr_301.g13981,Sc4wPfr_1303.g19216,Sc4wPfr_39.g20478,Sc4wPfr_1127.g22572,Sc4wPfr_208.3.g23088,Sc4wPfr_248.2.g2903	6	Sc4wPfr_301.g13981,Sc4wPfr_1303.g19216,Sc4wPfr_39.g20478,Sc4wPfr_1127.g22572,Sc4wPfr_208.3.g23088,Sc4wPfr_248.2.g2903	0	0	10610	4	12	10719	2370.5	8348.5	98.9831	9.7746	0.0943581
GO:0060395	SMAD protein signal transduction	14	Sc4wPfr_569.g11124,Sc4wPfr_1844.g14252,Sc4wPfr_119.1.g1450,Sc4wPfr_507.g18571,Sc4wPfr_68.g2328,Sc4wPfr_137.g27950,Sc4wPfr_137.g27953,Sc4wPfr_363.3.g30478,Sc4wPfr_363.3.g30507,Sc4wPfr_492.2.g532,Sc4wPfr_492.2.g535,Sc4wPfr_492.2.g535,Sc4wPfr_492.2.g536,Sc4wPfr_147.g8553	12	Sc4wPfr_569.g11124,Sc4wPfr_1844.g14252,Sc4wPfr_119.1.g1450,Sc4wPfr_507.g18571,Sc4wPfr_68.g2328,Sc4wPfr_137.g27950,Sc4wPfr_137.g27953,Sc4wPfr_363.3.g30478,Sc4wPfr_363.3.g30507,Sc4wPfr_492.2.g532,Sc4wPfr_492.2.g535,Sc4wPfr_492.2.g536	1.0513e-05	0.0235703	15104	4	12	15165	3348.17	11816.8	99.5978	9.7746	0.0942417
GO:0030953	astral microtubule organization	11	Sc4wPfr_138.g13922,Sc4wPfr_32.g14567,Sc4wPfr_1091.g16434,Sc4wPfr_275.3.g1987,Sc4wPfr_699.g21675,Sc4wPfr_57.2.g24940,Sc4wPfr_2515.g28086,Sc4wPfr_947.g29654,Sc4wPfr_36.2.g7205,Sc4wPfr_582.g7491,Sc4wPfr_582.g7494	9	Sc4wPfr_1091.g16434,Sc4wPfr_275.3.g1987,Sc4wPfr_699.g21675,Sc4wPfr_57.2.g24940,Sc4wPfr_2515.g28086,Sc4wPfr_947.g29654,Sc4wPfr_36.2.g7205,Sc4wPfr_582.g7491,Sc4wPfr_582.g7494	0.00019762	0.349793	15535	8	23	15744	3359	12385	98.6725	18.9383	0.0939449
GO:0006164	purine nucleotide biosynthetic process	7	Sc4wPfr_439.g20847,Sc4wPfr_698.2.g23065,Sc4wPfr_804.g24098,Sc4wPfr_399.g28065,Sc4wPfr_246.g4294,Sc4wPfr_305.g4608,Sc4wPfr_441.g7679	7	Sc4wPfr_439.g20847,Sc4wPfr_698.2.g23065,Sc4wPfr_804.g24098,Sc4wPfr_399.g28065,Sc4wPfr_246.g4294,Sc4wPfr_305.g4608,Sc4wPfr_441.g7679	0	0	12168	7	22	12282	2802.5	9479.5	99.0718	17.7165	0.0936196
GO:0048406	nerve growth factor binding	14	Sc4wPfr_634.1.g17844,Sc4wPfr_634.1.g17845,Sc4wPfr_424.1.g2106,Sc4wPfr_424.1.g2106,Sc4wPfr_384.g24903,Sc4wPfr_338.g25884,Sc4wPfr_587.g26449,Sc4wPfr_44.g26901,Sc4wPfr_48.g30209,Sc4wPfr_48.g30211,Sc4wPfr_826.g32481,Sc4wPfr_62.g4435,Sc4wPfr_1855.g9253,Sc4wPfr_1855.g9253	11	Sc4wPfr_634.1.g17844,Sc4wPfr_634.1.g17845,Sc4wPfr_424.1.g2106,Sc4wPfr_384.g24903,Sc4wPfr_338.g25884,Sc4wPfr_587.g26449,Sc4wPfr_44.g26901,Sc4wPfr_48.g30209,Sc4wPfr_48.g30211,Sc4wPfr_62.g4435,Sc4wPfr_1855.g9253	0.00013374	0.246748	25112	11	33	25266	5541.33	19724.7	99.3905	26.8801	0.0933071
GO:0042921	glucocorticoid receptor signaling pathway	7	Sc4wPfr_952.1.g9540,Sc4wPfr_274.2.g1518,Sc4wPfr_68.2.g16394,Sc4wPfr_107.1.g20655,Sc4wPfr_107.1.g20655,Sc4wPfr_384.g24822,Sc4wPfr_263.1.g30963	6	Sc4wPfr_952.1.g9540,Sc4wPfr_274.2.g1518,Sc4wPfr_68.2.g16394,Sc4wPfr_107.1.g20655,Sc4wPfr_384.g24822,Sc4wPfr_263.1.g30963	0.0006224	0.964724	11396	4	12	11457	2509.83	8947.17	99.4676	9.7746	0.0932351
GO:0070213	protein auto-ADP-ribosylation	12	Sc4wPfr_558.1.g10141,Sc4wPfr_250.g16019,Sc4wPfr_615.1.g17636,Sc4wPfr_615.1.g17655,Sc4wPfr_188.g2083,Sc4wPfr_846.1.g25646,Sc4wPfr_447.g29030,Sc4wPfr_1152.g30261,Sc4wPfr_1152.g30261,Sc4wPfr_463.g30924,Sc4wPfr_1357.1.g3226,Sc4wPfr_330.g6888	9	Sc4wPfr_558.1.g10141,Sc4wPfr_250.g16019,Sc4wPfr_615.1.g17636,Sc4wPfr_188.g2083,Sc4wPfr_846.1.g25646,Sc4wPfr_447.g29030,Sc4wPfr_1152.g30261,Sc4wPfr_1357.1.g3226,Sc4wPfr_330.g6888	0.00081183	1	19769	16	48	19899	4371	15528	99.3467	39.0984	0.0932059
GO:0051787	misfolded protein binding	10	Sc4wPfr_469.1.g10205,Sc4wPfr_237.2.g16168,Sc4wPfr_1303.g19216,Sc4wPfr_39.g20478,Sc4wPfr_1127.g22572,Sc4wPfr_268.g25761,Sc4wPfr_886.g29510,Sc4wPfr_886.g29516,Sc4wPfr_624.g29786,Sc4wPfr_1288.g8193	9	Sc4wPfr_469.1.g10205,Sc4wPfr_237.2.g16168,Sc4wPfr_1303.g19216,Sc4wPfr_39.g20478,Sc4wPfr_1127.g22572,Sc4wPfr_268.g25761,Sc4wPfr_886.g29510,Sc4wPfr_624.g29786,Sc4wPfr_1288.g8193	2.6287e-05	0.0563331	15233	9	27	15405	3378.33	12026.7	98.8835	21.9928	0.0931812
GO:0043627	response to estrogen	17	Sc4wPfr_85.g928,Sc4wPfr_180.g11691,Sc4wPfr_1010.g13531,Sc4wPfr_250.g16061,Sc4wPfr_523.g16319,Sc4wPfr_523.g16322,Sc4wPfr_439.g20911,Sc4wPfr_1163.g25137,Sc4wPfr_85.1.g31254,Sc4wPfr_651.1.g32671,Sc4wPfr_651.1.g32672,Sc4wPfr_651.1.g32673,Sc4wPfr_628.g32849,Sc4wPfr_253.1.g5516,Sc4wPfr_941.g5933,Sc4wPfr_289.1.g8528,Sc4wPfr_1201.1.g8691	16	Sc4wPfr_85.g928,Sc4wPfr_1010.g13531,Sc4wPfr_250.g16061,Sc4wPfr_523.g16319,Sc4wPfr_523.g16322,Sc4wPfr_439.g20911,Sc4wPfr_1163.g25137,Sc4wPfr_85.1.g31254,Sc4wPfr_651.1.g32671,Sc4wPfr_651.1.g32672,Sc4wPfr_651.1.g32673,Sc4wPfr_628.g32849,Sc4wPfr_253.1.g5516,Sc4wPfr_941.g5933,Sc4wPfr_289.1.g8528,Sc4wPfr_1201.1.g8691	1.6298e-08	4.6074e-05	28306	14	41	29145	6259.17	22885.8	97.1213	33.6002	0.0930181
GO:0043488	regulation of mRNA stability	94	Sc4wPfr_177.g9411,Sc4wPfr_307.g9666,Sc4wPfr_1300.g9807,Sc4wPfr_1300.g9808,Sc4wPfr_1300.g9832,Sc4wPfr_552.g10525,Sc4wPfr_552.g10527,Sc4wPfr_1213.g1096,Sc4wPfr_90.g1121,Sc4wPfr_73.g11515,Sc4wPfr_773.g11729,Sc4wPfr_773.g11730,Sc4wPfr_90.g1171,Sc4wPfr_689.g11898,Sc4wPfr_689.g11898,Sc4wPfr_90.g1179,Sc4wPfr_328.2.g12071,Sc4wPfr_720.g12316,Sc4wPfr_720.g12316,Sc4wPfr_720.g12316,Sc4wPfr_423.g13418,Sc4wPfr…	83	Sc4wPfr_177.g9411,Sc4wPfr_307.g9666,Sc4wPfr_1300.g9807,Sc4wPfr_1300.g9808,Sc4wPfr_1300.g9832,Sc4wPfr_552.g10525,Sc4wPfr_552.g10527,Sc4wPfr_1213.g1096,Sc4wPfr_90.g1121,Sc4wPfr_73.g11515,Sc4wPfr_773.g11729,Sc4wPfr_773.g11730,Sc4wPfr_90.g1171,Sc4wPfr_689.g11898,Sc4wPfr_328.2.g12071,Sc4wPfr_720.g12316,Sc4wPfr_423.g13418,Sc4wPfr_575.g14670,Sc4wPfr_618.g14851,Sc4wPfr_921.g15154,Sc4wPfr_250.g15959,Sc4wP…	3.8481e-28	1.306e-24	124539	132	396	125636	27450	97599	99.1268	322.562	0.0929302
GO:0007094	mitotic spindle assembly checkpoint	15	Sc4wPfr_27.g12200,Sc4wPfr_618.g14846,Sc4wPfr_17.g15826,Sc4wPfr_52.g22756,Sc4wPfr_52.g22759,Sc4wPfr_384.g24823,Sc4wPfr_856.g31442,Sc4wPfr_628.g32849,Sc4wPfr_224.1.g33415,Sc4wPfr_830.g6288,Sc4wPfr_830.g6290,Sc4wPfr_598.g8377,Sc4wPfr_598.g8378,Sc4wPfr_1380.1.g8407,Sc4wPfr_1380.1.g8409	14	Sc4wPfr_27.g12200,Sc4wPfr_618.g14846,Sc4wPfr_17.g15826,Sc4wPfr_52.g22756,Sc4wPfr_384.g24823,Sc4wPfr_856.g31442,Sc4wPfr_628.g32849,Sc4wPfr_224.1.g33415,Sc4wPfr_830.g6288,Sc4wPfr_830.g6290,Sc4wPfr_598.g8377,Sc4wPfr_598.g8378,Sc4wPfr_1380.1.g8407,Sc4wPfr_1380.1.g8409	1.345e-07	0.00036233	17722	7	21	17985	3929.5	14055.5	98.5377	17.1055	0.0928885
GO:0030514	negative regulation of BMP signaling pathway	18	Sc4wPfr_720.g12316,Sc4wPfr_720.g12316,Sc4wPfr_720.g12316,Sc4wPfr_59.2.g12546,Sc4wPfr_297.g13156,Sc4wPfr_1177.g14229,Sc4wPfr_635.g14695,Sc4wPfr_507.g18571,Sc4wPfr_958.g18792,Sc4wPfr_14.g1858,Sc4wPfr_66.g19077,Sc4wPfr_66.g19079,Sc4wPfr_804.g24094,Sc4wPfr_57.2.g24924,Sc4wPfr_373.g28519,Sc4wPfr_126.2.g29273,Sc4wPfr_381.1.g32157,Sc4wPfr_1020.1.g6621	15	Sc4wPfr_720.g12316,Sc4wPfr_59.2.g12546,Sc4wPfr_297.g13156,Sc4wPfr_1177.g14229,Sc4wPfr_635.g14695,Sc4wPfr_507.g18571,Sc4wPfr_958.g18792,Sc4wPfr_14.g1858,Sc4wPfr_66.g19077,Sc4wPfr_66.g19079,Sc4wPfr_57.2.g24924,Sc4wPfr_373.g28519,Sc4wPfr_126.2.g29273,Sc4wPfr_381.1.g32157,Sc4wPfr_1020.1.g6621	3.2412e-06	0.00778215	18856	8	24	18942	4135.5	14806.5	99.546	19.5492	0.0927738
GO:0042692	muscle cell differentiation	12	Sc4wPfr_467.g16222,Sc4wPfr_221.g17487,Sc4wPfr_1061.g18810,Sc4wPfr_1061.g18811,Sc4wPfr_798.g21016,Sc4wPfr_391.g24683,Sc4wPfr_1327.g267,Sc4wPfr_200.g3558,Sc4wPfr_832.g4713,Sc4wPfr_440.g6790,Sc4wPfr_975.g7262,Sc4wPfr_16.1.g8474	10	Sc4wPfr_467.g16222,Sc4wPfr_1061.g18810,Sc4wPfr_1061.g18811,Sc4wPfr_798.g21016,Sc4wPfr_391.g24683,Sc4wPfr_200.g3558,Sc4wPfr_832.g4713,Sc4wPfr_440.g6790,Sc4wPfr_975.g7262,Sc4wPfr_16.1.g8474	7.4783e-05	0.147546	14154	6	18	14235	3093.67	11141.3	99.431	14.6619	0.0922319
GO:0008250	oligosaccharyltransferase complex	8	Sc4wPfr_483.g14168,Sc4wPfr_921.g15148,Sc4wPfr_1080.g15236,Sc4wPfr_10.g18880,Sc4wPfr_650.g22977,Sc4wPfr_338.g25860,Sc4wPfr_739.g28831,Sc4wPfr_85.g882	8	Sc4wPfr_483.g14168,Sc4wPfr_921.g15148,Sc4wPfr_1080.g15236,Sc4wPfr_10.g18880,Sc4wPfr_650.g22977,Sc4wPfr_338.g25860,Sc4wPfr_739.g28831,Sc4wPfr_85.g882	0	0	10310	4	13	10383	2397.33	7985.67	99.2969	10.3855	0.092067
GO:0060322	head development	7	Sc4wPfr_1838.g9423,Sc4wPfr_504.g10336,Sc4wPfr_729.g12870,Sc4wPfr_208.1.g13279,Sc4wPfr_243.g15582,Sc4wPfr_319.1.g3966,Sc4wPfr_440.g6790	7	Sc4wPfr_1838.g9423,Sc4wPfr_504.g10336,Sc4wPfr_729.g12870,Sc4wPfr_208.1.g13279,Sc4wPfr_243.g15582,Sc4wPfr_319.1.g3966,Sc4wPfr_440.g6790	0	0	11680	6	18	12030	2602	9428	97.0906	14.6619	0.0916094
GO:0019005	SCF ubiquitin ligase complex	17	Sc4wPfr_2145.g14619,Sc4wPfr_2145.g14626,Sc4wPfr_26.g17294,Sc4wPfr_26.g17294,Sc4wPfr_811.1.g17364,Sc4wPfr_424.1.g2095,Sc4wPfr_810.g2521,Sc4wPfr_674.1.g25727,Sc4wPfr_353.g28174,Sc4wPfr_248.g29626,Sc4wPfr_363.3.g30518,Sc4wPfr_41.g30780,Sc4wPfr_628.g32824,Sc4wPfr_62.g4430,Sc4wPfr_62.g4434,Sc4wPfr_330.g6879,Sc4wPfr_652.2.g7419	16	Sc4wPfr_2145.g14619,Sc4wPfr_2145.g14626,Sc4wPfr_26.g17294,Sc4wPfr_811.1.g17364,Sc4wPfr_424.1.g2095,Sc4wPfr_810.g2521,Sc4wPfr_674.1.g25727,Sc4wPfr_353.g28174,Sc4wPfr_248.g29626,Sc4wPfr_363.3.g30518,Sc4wPfr_41.g30780,Sc4wPfr_628.g32824,Sc4wPfr_62.g4430,Sc4wPfr_62.g4434,Sc4wPfr_330.g6879,Sc4wPfr_652.2.g7419	1.6298e-08	4.6074e-05	19259	10	30	19410	4188.17	15221.8	99.2221	24.4365	0.0913154
GO:0032968	positive regulation of transcription elongation from RNA polymerase II promoter	13	Sc4wPfr_1300.g9808,Sc4wPfr_250.g15984,Sc4wPfr_252.g22303,Sc4wPfr_252.g22304,Sc4wPfr_106.g23470,Sc4wPfr_106.g23471,Sc4wPfr_137.g27957,Sc4wPfr_3.2.g31018,Sc4wPfr_381.1.g32175,Sc4wPfr_207.g3950,Sc4wPfr_914.g6898,Sc4wPfr_36.2.g7212,Sc4wPfr_1855.g9246	13	Sc4wPfr_1300.g9808,Sc4wPfr_250.g15984,Sc4wPfr_252.g22303,Sc4wPfr_252.g22304,Sc4wPfr_106.g23470,Sc4wPfr_106.g23471,Sc4wPfr_137.g27957,Sc4wPfr_3.2.g31018,Sc4wPfr_381.1.g32175,Sc4wPfr_207.g3950,Sc4wPfr_914.g6898,Sc4wPfr_36.2.g7212,Sc4wPfr_1855.g9246	0	0	14114	3	9	14298	3073.83	11224.2	98.7131	7.33095	0.0911241
GO:0030032	lamellipodium assembly	19	Sc4wPfr_165.g10037,Sc4wPfr_165.g10037,Sc4wPfr_165.g10037,Sc4wPfr_165.g10039,Sc4wPfr_165.g10041,Sc4wPfr_2074.g13186,Sc4wPfr_423.g13436,Sc4wPfr_423.g13436,Sc4wPfr_104.g15008,Sc4wPfr_977.1.g21529,Sc4wPfr_977.g21591,Sc4wPfr_788.g26563,Sc4wPfr_372.g28038,Sc4wPfr_372.g28040,Sc4wPfr_1214.g29709,Sc4wPfr_715.g30424,Sc4wPfr_463.g30922,Sc4wPfr_463.g30922,Sc4wPfr_356.g7051	14	Sc4wPfr_165.g10037,Sc4wPfr_165.g10039,Sc4wPfr_165.g10041,Sc4wPfr_2074.g13186,Sc4wPfr_423.g13436,Sc4wPfr_104.g15008,Sc4wPfr_977.1.g21529,Sc4wPfr_977.g21591,Sc4wPfr_788.g26563,Sc4wPfr_372.g28040,Sc4wPfr_1214.g29709,Sc4wPfr_715.g30424,Sc4wPfr_463.g30922,Sc4wPfr_356.g7051	0.00010796	0.201665	17439	12	35	17613	3701.5	13848.5	99.0121	28.7129	0.0911144
GO:0005086	ARF guanyl-nucleotide exchange factor activity	8	Sc4wPfr_102.g11059,Sc4wPfr_17.g15886,Sc4wPfr_66.g19025,Sc4wPfr_789.g22447,Sc4wPfr_208.3.g23087,Sc4wPfr_493.g3152,Sc4wPfr_493.g3152,Sc4wPfr_920.g414	6	Sc4wPfr_102.g11059,Sc4wPfr_66.g19025,Sc4wPfr_789.g22447,Sc4wPfr_208.3.g23087,Sc4wPfr_493.g3152,Sc4wPfr_920.g414	0.00346188	1	15892	6	18	16021	3400.83	12418.2	99.1948	14.6619	0.0909933
GO:0031519	PcG protein complex	17	Sc4wPfr_1213.g1084,Sc4wPfr_347.g19303,Sc4wPfr_347.g19303,Sc4wPfr_2673.g20324,Sc4wPfr_2673.g20325,Sc4wPfr_39.g20457,Sc4wPfr_39.g20457,Sc4wPfr_39.g20457,Sc4wPfr_39.g20465,Sc4wPfr_132.g22645,Sc4wPfr_132.g22645,Sc4wPfr_132.g22646,Sc4wPfr_106.g23544,Sc4wPfr_106.g23544,Sc4wPfr_1754.1.g28466,Sc4wPfr_652.2.g7421,Sc4wPfr_719.g8354	10	Sc4wPfr_1213.g1084,Sc4wPfr_347.g19303,Sc4wPfr_39.g20457,Sc4wPfr_39.g20465,Sc4wPfr_132.g22645,Sc4wPfr_132.g22646,Sc4wPfr_106.g23544,Sc4wPfr_1754.1.g28466,Sc4wPfr_652.2.g7421,Sc4wPfr_719.g8354	0.0115634	1	12705	3	9	12939	2737.67	10033.3	98.1915	7.33095	0.090771
GO:0048188	Set1C/COMPASS complex	15	Sc4wPfr_1727.g105,Sc4wPfr_73.g11564,Sc4wPfr_250.g15997,Sc4wPfr_250.g16061,Sc4wPfr_14.g1750,Sc4wPfr_354.g19208,Sc4wPfr_248.1.g22338,Sc4wPfr_372.g28030,Sc4wPfr_353.g28179,Sc4wPfr_29.g30001,Sc4wPfr_396.g3056,Sc4wPfr_651.1.g32671,Sc4wPfr_651.1.g32672,Sc4wPfr_651.1.g32673,Sc4wPfr_172.g6070	14	Sc4wPfr_1727.g105,Sc4wPfr_73.g11564,Sc4wPfr_250.g15997,Sc4wPfr_250.g16061,Sc4wPfr_14.g1750,Sc4wPfr_354.g19208,Sc4wPfr_372.g28030,Sc4wPfr_353.g28179,Sc4wPfr_29.g30001,Sc4wPfr_396.g3056,Sc4wPfr_651.1.g32671,Sc4wPfr_651.1.g32672,Sc4wPfr_651.1.g32673,Sc4wPfr_172.g6070	1.345e-07	0.00036233	21521	12	37	21825	4778.5	17046.5	98.6071	29.9347	0.0904874
GO:0004118	cGMP-stimulated cyclic-nucleotide phosphodiesterase activity	8	Sc4wPfr_1300.g9815,Sc4wPfr_351.g11300,Sc4wPfr_351.g11300,Sc4wPfr_328.2.g12084,Sc4wPfr_250.g16028,Sc4wPfr_250.g16040,Sc4wPfr_954.g27087,Sc4wPfr_954.g27088	5	Sc4wPfr_1300.g9815,Sc4wPfr_351.g11300,Sc4wPfr_328.2.g12084,Sc4wPfr_250.g16028,Sc4wPfr_250.g16040	0.0247137	1	10895	8	24	11019	2346.67	8660.33	98.8747	19.5492	0.0897605
GO:0045670	regulation of osteoclast differentiation	6	Sc4wPfr_158.2.g10604,Sc4wPfr_274.1.g13602,Sc4wPfr_1091.g16442,Sc4wPfr_562.1.g31088,Sc4wPfr_562.1.g31089,Sc4wPfr_975.g7262	6	Sc4wPfr_158.2.g10604,Sc4wPfr_274.1.g13602,Sc4wPfr_1091.g16442,Sc4wPfr_562.1.g31088,Sc4wPfr_562.1.g31089,Sc4wPfr_975.g7262	0	0	14027	6	19	14130	3126	11004	99.2711	15.2728	0.0893775
GO:0006817	phosphate ion transport	9	Sc4wPfr_197.g11019,Sc4wPfr_27.g12215,Sc4wPfr_639.g22942,Sc4wPfr_293.g24398,Sc4wPfr_1163.g25137,Sc4wPfr_834.1.g27873,Sc4wPfr_628.g32878,Sc4wPfr_112.1.g5125,Sc4wPfr_1898.g7941	7	Sc4wPfr_639.g22942,Sc4wPfr_293.g24398,Sc4wPfr_1163.g25137,Sc4wPfr_834.1.g27873,Sc4wPfr_628.g32878,Sc4wPfr_112.1.g5125,Sc4wPfr_1898.g7941	0.00134697	1	13167	8	27	13242	3075.17	10166.8	99.4336	21.3819	0.089142
GO:0030216	keratinocyte differentiation	13	Sc4wPfr_274.2.g1522,Sc4wPfr_1243.g15462,Sc4wPfr_523.g16385,Sc4wPfr_313.g17063,Sc4wPfr_977.1.g21529,Sc4wPfr_740.1.g22471,Sc4wPfr_536.g2751,Sc4wPfr_399.g28064,Sc4wPfr_287.2.g28262,Sc4wPfr_248.g29621,Sc4wPfr_201.1.g33280,Sc4wPfr_1298.g6418,Sc4wPfr_461.g8058	12	Sc4wPfr_274.2.g1522,Sc4wPfr_1243.g15462,Sc4wPfr_523.g16385,Sc4wPfr_313.g17063,Sc4wPfr_977.1.g21529,Sc4wPfr_740.1.g22471,Sc4wPfr_399.g28064,Sc4wPfr_287.2.g28262,Sc4wPfr_248.g29621,Sc4wPfr_201.1.g33280,Sc4wPfr_1298.g6418,Sc4wPfr_461.g8058	1.1097e-06	0.00279638	13851	9	28	13965	3045.17	10919.8	99.1837	22.6038	0.0891338
GO:0042771	intrinsic apoptotic signaling pathway in response to DNA damage by p53 class mediator	17	Sc4wPfr_85.g928,Sc4wPfr_945.g15378,Sc4wPfr_507.g18571,Sc4wPfr_347.g19264,Sc4wPfr_198.g23260,Sc4wPfr_677.g23719,Sc4wPfr_384.g24866,Sc4wPfr_176.g26287,Sc4wPfr_176.g26287,Sc4wPfr_319.g27358,Sc4wPfr_319.g27358,Sc4wPfr_363.3.g30505,Sc4wPfr_263.1.g30951,Sc4wPfr_1007.g33075,Sc4wPfr_305.g4589,Sc4wPfr_6.1.g568,Sc4wPfr_6.1.g570	15	Sc4wPfr_85.g928,Sc4wPfr_945.g15378,Sc4wPfr_507.g18571,Sc4wPfr_347.g19264,Sc4wPfr_198.g23260,Sc4wPfr_677.g23719,Sc4wPfr_384.g24866,Sc4wPfr_176.g26287,Sc4wPfr_319.g27358,Sc4wPfr_363.3.g30505,Sc4wPfr_263.1.g30951,Sc4wPfr_1007.g33075,Sc4wPfr_305.g4589,Sc4wPfr_6.1.g568,Sc4wPfr_6.1.g570	5.3518e-07	0.00137433	26283	12	37	26457	5707.67	20704.3	99.3423	29.9347	0.0890556
GO:0044548	S100 protein binding	12	Sc4wPfr_828.1.g12787,Sc4wPfr_828.1.g12788,Sc4wPfr_32.g14567,Sc4wPfr_17.g15913,Sc4wPfr_106.g23543,Sc4wPfr_1269.g30707,Sc4wPfr_338.1.g31637,Sc4wPfr_338.1.g31638,Sc4wPfr_338.1.g31647,Sc4wPfr_582.g7491,Sc4wPfr_582.g7494,Sc4wPfr_703.g8914	9	Sc4wPfr_828.1.g12787,Sc4wPfr_828.1.g12788,Sc4wPfr_106.g23543,Sc4wPfr_1269.g30707,Sc4wPfr_338.1.g31637,Sc4wPfr_338.1.g31638,Sc4wPfr_338.1.g31647,Sc4wPfr_582.g7491,Sc4wPfr_582.g7494	0.00081183	1	17714	7	22	17856	3908.5	13947.5	99.2047	17.7165	0.0888586
GO:0032435	negative regulation of proteasomal ubiquitin-dependent protein catabolic process	10	Sc4wPfr_923.g11408,Sc4wPfr_766.g13544,Sc4wPfr_766.g13544,Sc4wPfr_789.g22438,Sc4wPfr_372.g28025,Sc4wPfr_38.g5828,Sc4wPfr_330.g6862,Sc4wPfr_36.2.g7194,Sc4wPfr_289.1.g8521,Sc4wPfr_289.1.g8528	9	Sc4wPfr_923.g11408,Sc4wPfr_766.g13544,Sc4wPfr_789.g22438,Sc4wPfr_372.g28025,Sc4wPfr_38.g5828,Sc4wPfr_330.g6862,Sc4wPfr_36.2.g7194,Sc4wPfr_289.1.g8521,Sc4wPfr_289.1.g8528	2.6287e-05	0.0563331	11700	23	72	11775	2591.83	9183.17	99.3631	58.0367	0.088627
GO:0007098	centrosome cycle	43	Sc4wPfr_504.g10324,Sc4wPfr_504.g10324,Sc4wPfr_1909.g11473,Sc4wPfr_144.1.g11745,Sc4wPfr_90.g1182,Sc4wPfr_1362.g13635,Sc4wPfr_138.g13922,Sc4wPfr_244.2.g15105,Sc4wPfr_244.2.g15105,Sc4wPfr_252.1.g15342,Sc4wPfr_1243.g15460,Sc4wPfr_641.g16836,Sc4wPfr_361.g20364,Sc4wPfr_908.g21219,Sc4wPfr_248.1.g22345,Sc4wPfr_586.g22365,Sc4wPfr_350.g2265,Sc4wPfr_350.g2265,Sc4wPfr_198.g23281,Sc4wPfr_475.1.g23423,Sc4wPfr_…	30	Sc4wPfr_504.g10324,Sc4wPfr_1909.g11473,Sc4wPfr_144.1.g11745,Sc4wPfr_1362.g13635,Sc4wPfr_244.2.g15105,Sc4wPfr_252.1.g15342,Sc4wPfr_1243.g15460,Sc4wPfr_641.g16836,Sc4wPfr_361.g20364,Sc4wPfr_248.1.g22345,Sc4wPfr_586.g22365,Sc4wPfr_350.g2265,Sc4wPfr_198.g23281,Sc4wPfr_475.1.g23423,Sc4wPfr_2949.g24301,Sc4wPfr_412.g24327,Sc4wPfr_384.g24823,Sc4wPfr_39.1.g26772,Sc4wPfr_555.g27135,Sc4wPfr_65.g31679,Sc4wPf…	7.0047e-07	0.0017813	54396	26	80	55380	11870.5	43392.5	98.2232	64.7567	0.0885427
GO:0030140	trans-Golgi network transport vesicle	27	Sc4wPfr_17.g15866,Sc4wPfr_17.g15874,Sc4wPfr_641.g16841,Sc4wPfr_634.1.g17845,Sc4wPfr_14.g1882,Sc4wPfr_482.g19125,Sc4wPfr_439.g20897,Sc4wPfr_424.1.g2106,Sc4wPfr_424.1.g2106,Sc4wPfr_962.g23730,Sc4wPfr_384.g24903,Sc4wPfr_2482.1.g25370,Sc4wPfr_227.g25806,Sc4wPfr_338.g25884,Sc4wPfr_44.g26901,Sc4wPfr_48.g30209,Sc4wPfr_48.g30211,Sc4wPfr_85.1.g31220,Sc4wPfr_296.g32345,Sc4wPfr_826.g32481,Sc4wPfr_24.g32561,…	23	Sc4wPfr_17.g15866,Sc4wPfr_17.g15874,Sc4wPfr_641.g16841,Sc4wPfr_634.1.g17845,Sc4wPfr_14.g1882,Sc4wPfr_482.g19125,Sc4wPfr_439.g20897,Sc4wPfr_424.1.g2106,Sc4wPfr_962.g23730,Sc4wPfr_384.g24903,Sc4wPfr_227.g25806,Sc4wPfr_338.g25884,Sc4wPfr_44.g26901,Sc4wPfr_48.g30209,Sc4wPfr_48.g30211,Sc4wPfr_85.1.g31220,Sc4wPfr_296.g32345,Sc4wPfr_24.g32561,Sc4wPfr_594.g3248,Sc4wPfr_246.g4300,Sc4wPfr_62.g4435,Sc4wPfr_…	8.7168e-09	2.486e-05	35714	20	63	36039	7863.67	28175.3	99.0982	50.7057	0.0881701
GO:0030331	estrogen receptor binding	28	Sc4wPfr_504.g10359,Sc4wPfr_158.2.g10594,Sc4wPfr_633.g12806,Sc4wPfr_26.g17280,Sc4wPfr_26.g17281,Sc4wPfr_26.g17281,Sc4wPfr_6.g19148,Sc4wPfr_1073.g23703,Sc4wPfr_622.g24235,Sc4wPfr_391.g24609,Sc4wPfr_384.g24895,Sc4wPfr_289.g2548,Sc4wPfr_319.g27364,Sc4wPfr_248.g29621,Sc4wPfr_263.1.g30982,Sc4wPfr_263.1.g30983,Sc4wPfr_263.1.g30983,Sc4wPfr_2518.g31026,Sc4wPfr_1036.g319,Sc4wPfr_1036.g319,Sc4wPfr_224.1.g33…	23	Sc4wPfr_504.g10359,Sc4wPfr_158.2.g10594,Sc4wPfr_633.g12806,Sc4wPfr_26.g17280,Sc4wPfr_26.g17281,Sc4wPfr_1073.g23703,Sc4wPfr_622.g24235,Sc4wPfr_391.g24609,Sc4wPfr_384.g24895,Sc4wPfr_289.g2548,Sc4wPfr_319.g27364,Sc4wPfr_248.g29621,Sc4wPfr_263.1.g30982,Sc4wPfr_263.1.g30983,Sc4wPfr_2518.g31026,Sc4wPfr_1036.g319,Sc4wPfr_224.1.g33437,Sc4wPfr_383.g33550,Sc4wPfr_5.g3417,Sc4wPfr_941.g5943,Sc4wPfr_458.g6396…	4.0685e-08	0.00011261	34296	27	85	34626	7562.33	27063.7	99.047	68.4222	0.0881512
GO:0044666	MLL3/4 complex	12	Sc4wPfr_1727.g105,Sc4wPfr_73.g11564,Sc4wPfr_20.g15628,Sc4wPfr_250.g16061,Sc4wPfr_14.g1750,Sc4wPfr_372.g28030,Sc4wPfr_353.g28179,Sc4wPfr_29.g30001,Sc4wPfr_651.1.g32671,Sc4wPfr_651.1.g32672,Sc4wPfr_651.1.g32673,Sc4wPfr_1201.1.g8691	12	Sc4wPfr_1727.g105,Sc4wPfr_73.g11564,Sc4wPfr_20.g15628,Sc4wPfr_250.g16061,Sc4wPfr_14.g1750,Sc4wPfr_372.g28030,Sc4wPfr_353.g28179,Sc4wPfr_29.g30001,Sc4wPfr_651.1.g32671,Sc4wPfr_651.1.g32672,Sc4wPfr_651.1.g32673,Sc4wPfr_1201.1.g8691	0	0	25753	13	40	26064	5564.83	20499.2	98.8068	32.3784	0.0878402
GO:0000398	mRNA splicing, via spliceosome	184	Sc4wPfr_177.g9412,Sc4wPfr_952.1.g9538,Sc4wPfr_103.3.g10558,Sc4wPfr_103.3.g10560,Sc4wPfr_103.3.g10565,Sc4wPfr_696.g10813,Sc4wPfr_923.g11434,Sc4wPfr_73.g11515,Sc4wPfr_73.g11564,Sc4wPfr_773.g11725,Sc4wPfr_773.g11725,Sc4wPfr_773.g11725,Sc4wPfr_96.g11928,Sc4wPfr_96.g11941,Sc4wPfr_90.g1180,Sc4wPfr_96.g11970,Sc4wPfr_146.g12057,Sc4wPfr_322.g12149,Sc4wPfr_322.g12149,Sc4wPfr_322.g12150,Sc4wPfr_720.g12273,S…	153	Sc4wPfr_177.g9412,Sc4wPfr_952.1.g9538,Sc4wPfr_103.3.g10560,Sc4wPfr_103.3.g10565,Sc4wPfr_696.g10813,Sc4wPfr_923.g11434,Sc4wPfr_73.g11515,Sc4wPfr_73.g11564,Sc4wPfr_773.g11725,Sc4wPfr_96.g11928,Sc4wPfr_96.g11941,Sc4wPfr_96.g11970,Sc4wPfr_146.g12057,Sc4wPfr_322.g12149,Sc4wPfr_322.g12150,Sc4wPfr_720.g12273,Sc4wPfr_59.2.g12411,Sc4wPfr_59.2.g12549,Sc4wPfr_446.g12594,Sc4wPfr_44.1.g12993,Sc4wPfr_44.1.g129…	1.4222e-42	4.8967e-39	220003	181	578	223115	48938.5	173274	98.6052	463.682	0.0878066
GO:0044327	dendritic spine head	11	Sc4wPfr_810.g2520,Sc4wPfr_4146.g26959,Sc4wPfr_98.g2686,Sc4wPfr_98.g2699,Sc4wPfr_98.g2700,Sc4wPfr_759.g27583,Sc4wPfr_830.g6317,Sc4wPfr_830.g6318,Sc4wPfr_830.g6319,Sc4wPfr_830.g6320,Sc4wPfr_92.g7726	11	Sc4wPfr_810.g2520,Sc4wPfr_4146.g26959,Sc4wPfr_98.g2686,Sc4wPfr_98.g2699,Sc4wPfr_98.g2700,Sc4wPfr_759.g27583,Sc4wPfr_830.g6317,Sc4wPfr_830.g6318,Sc4wPfr_830.g6319,Sc4wPfr_830.g6320,Sc4wPfr_92.g7726	0	0	19320	17	57	19410	4438	14972	99.5363	45.2075	0.0877132
GO:0019637	organophosphate metabolic process	14	Sc4wPfr_446.g12579,Sc4wPfr_484.g18318,Sc4wPfr_977.g21594,Sc4wPfr_162.g21721,Sc4wPfr_162.g21723,Sc4wPfr_1201.g23931,Sc4wPfr_227.g25774,Sc4wPfr_3539.g26091,Sc4wPfr_2050.g26583,Sc4wPfr_2050.g26583,Sc4wPfr_2050.g26583,Sc4wPfr_954.g27106,Sc4wPfr_488.g29974,Sc4wPfr_582.2.g8397	9	Sc4wPfr_484.g18318,Sc4wPfr_977.g21594,Sc4wPfr_162.g21723,Sc4wPfr_1201.g23931,Sc4wPfr_227.g25774,Sc4wPfr_3539.g26091,Sc4wPfr_2050.g26583,Sc4wPfr_488.g29974,Sc4wPfr_582.2.g8397	0.00580494	1	16592	7	22	16713	3616.83	13075.2	99.276	17.7165	0.0876889
GO:0003918	DNA topoisomerase type II (ATP-hydrolyzing) activity	3	Sc4wPfr_523.g16331,Sc4wPfr_523.g16331,Sc4wPfr_422.g20197	1	Sc4wPfr_523.g16331	0.279567	1	10022	3	9	10047	2093.67	7941.33	99.7512	7.33095	0.0876506
GO:0031748	D1 dopamine receptor binding	10	Sc4wPfr_457.g21409,Sc4wPfr_4146.g26959,Sc4wPfr_98.g2686,Sc4wPfr_98.g2699,Sc4wPfr_98.g2700,Sc4wPfr_759.g27583,Sc4wPfr_830.g6317,Sc4wPfr_830.g6318,Sc4wPfr_830.g6319,Sc4wPfr_830.g6320	10	Sc4wPfr_457.g21409,Sc4wPfr_4146.g26959,Sc4wPfr_98.g2686,Sc4wPfr_98.g2699,Sc4wPfr_98.g2700,Sc4wPfr_759.g27583,Sc4wPfr_830.g6317,Sc4wPfr_830.g6318,Sc4wPfr_830.g6319,Sc4wPfr_830.g6320	0	0	19407	17	57	19500	4455.17	15044.8	99.5231	45.2075	0.0876289
GO:0032402	melanosome transport	15	Sc4wPfr_102.g11064,Sc4wPfr_102.g11068,Sc4wPfr_117.g15492,Sc4wPfr_615.g17532,Sc4wPfr_347.g19272,Sc4wPfr_699.g21675,Sc4wPfr_1201.g23950,Sc4wPfr_227.g25806,Sc4wPfr_2515.g28086,Sc4wPfr_248.g29615,Sc4wPfr_296.g32345,Sc4wPfr_839.g3985,Sc4wPfr_305.g4581,Sc4wPfr_719.g8339,Sc4wPfr_719.g8343	14	Sc4wPfr_102.g11064,Sc4wPfr_102.g11068,Sc4wPfr_117.g15492,Sc4wPfr_615.g17532,Sc4wPfr_699.g21675,Sc4wPfr_1201.g23950,Sc4wPfr_227.g25806,Sc4wPfr_2515.g28086,Sc4wPfr_248.g29615,Sc4wPfr_296.g32345,Sc4wPfr_839.g3985,Sc4wPfr_305.g4581,Sc4wPfr_719.g8339,Sc4wPfr_719.g8343	1.345e-07	0.00036233	13149	8	26	13368	2969.67	10398.3	98.3618	20.771	0.087405
GO:0043495	protein membrane anchor	10	Sc4wPfr_304.2.g12724,Sc4wPfr_304.2.g12725,Sc4wPfr_618.g14865,Sc4wPfr_588.g23911,Sc4wPfr_44.g26864,Sc4wPfr_65.g31741,Sc4wPfr_65.g31741,Sc4wPfr_108.g775,Sc4wPfr_1380.1.g8407,Sc4wPfr_1380.1.g8409	9	Sc4wPfr_304.2.g12724,Sc4wPfr_304.2.g12725,Sc4wPfr_618.g14865,Sc4wPfr_588.g23911,Sc4wPfr_44.g26864,Sc4wPfr_65.g31741,Sc4wPfr_108.g775,Sc4wPfr_1380.1.g8407,Sc4wPfr_1380.1.g8409	2.6287e-05	0.0563331	12982	4	12	13206	2716.5	10387.5	98.3038	9.7746	0.0869374
GO:0019229	regulation of vasoconstriction	15	Sc4wPfr_224.g18080,Sc4wPfr_412.g24374,Sc4wPfr_98.g2686,Sc4wPfr_98.g2687,Sc4wPfr_98.g2688,Sc4wPfr_98.g2699,Sc4wPfr_98.g2700,Sc4wPfr_759.g27583,Sc4wPfr_126.2.g29272,Sc4wPfr_248.2.g2934,Sc4wPfr_173.2.g33022,Sc4wPfr_830.g6317,Sc4wPfr_830.g6318,Sc4wPfr_830.g6319,Sc4wPfr_830.g6320	12	Sc4wPfr_412.g24374,Sc4wPfr_98.g2686,Sc4wPfr_98.g2687,Sc4wPfr_98.g2688,Sc4wPfr_98.g2699,Sc4wPfr_98.g2700,Sc4wPfr_759.g27583,Sc4wPfr_248.2.g2934,Sc4wPfr_830.g6317,Sc4wPfr_830.g6318,Sc4wPfr_830.g6319,Sc4wPfr_830.g6320	5.3419e-05	0.107907	21961	22	74	22047	5023.33	17023.7	99.6099	58.6476	0.0869368
GO:0043015	gamma-tubulin binding	26	Sc4wPfr_165.g10084,Sc4wPfr_165.g10084,Sc4wPfr_165.g10084,Sc4wPfr_165.g10084,Sc4wPfr_2313.g10578,Sc4wPfr_96.g11950,Sc4wPfr_59.2.g12399,Sc4wPfr_59.2.g12535,Sc4wPfr_1844.g14245,Sc4wPfr_776.g16569,Sc4wPfr_484.g18370,Sc4wPfr_484.g18370,Sc4wPfr_347.g19275,Sc4wPfr_347.g19346,Sc4wPfr_347.g19346,Sc4wPfr_347.g19349,Sc4wPfr_187.g1957,Sc4wPfr_1327.g239,Sc4wPfr_169.g29115,Sc4wPfr_169.g29115,Sc4wPfr_624.g29784…	18	Sc4wPfr_165.g10084,Sc4wPfr_2313.g10578,Sc4wPfr_96.g11950,Sc4wPfr_59.2.g12399,Sc4wPfr_59.2.g12535,Sc4wPfr_1844.g14245,Sc4wPfr_776.g16569,Sc4wPfr_484.g18370,Sc4wPfr_347.g19275,Sc4wPfr_347.g19346,Sc4wPfr_347.g19349,Sc4wPfr_1327.g239,Sc4wPfr_169.g29115,Sc4wPfr_624.g29784,Sc4wPfr_1660.g31973,Sc4wPfr_1660.g31974,Sc4wPfr_878.g6495,Sc4wPfr_36.2.g7196	7.9257e-05	0.15154	28286	16	51	28879	6170.33	22182.7	97.9466	40.9311	0.0868259
GO:0043923	positive regulation by host of viral transcription	16	Sc4wPfr_85.g928,Sc4wPfr_174.g11780,Sc4wPfr_119.1.g1450,Sc4wPfr_326.g15694,Sc4wPfr_475.1.g23423,Sc4wPfr_106.g23595,Sc4wPfr_68.g2328,Sc4wPfr_588.g23875,Sc4wPfr_384.g24863,Sc4wPfr_319.g27364,Sc4wPfr_1969.g28113,Sc4wPfr_224.1.g33422,Sc4wPfr_383.g33542,Sc4wPfr_383.g33543,Sc4wPfr_305.g4589,Sc4wPfr_589.g6036	16	Sc4wPfr_85.g928,Sc4wPfr_174.g11780,Sc4wPfr_119.1.g1450,Sc4wPfr_326.g15694,Sc4wPfr_475.1.g23423,Sc4wPfr_106.g23595,Sc4wPfr_68.g2328,Sc4wPfr_588.g23875,Sc4wPfr_384.g24863,Sc4wPfr_319.g27364,Sc4wPfr_1969.g28113,Sc4wPfr_224.1.g33422,Sc4wPfr_383.g33542,Sc4wPfr_383.g33543,Sc4wPfr_305.g4589,Sc4wPfr_589.g6036	0	0	27438	9	28	27618	5852.17	21633.8	99.3483	22.6038	0.086696
GO:0001671	ATPase activator activity	14	Sc4wPfr_773.g11727,Sc4wPfr_59.2.g12418,Sc4wPfr_1402.g13909,Sc4wPfr_1402.g13915,Sc4wPfr_1061.g18817,Sc4wPfr_1061.g18818,Sc4wPfr_1096.g19446,Sc4wPfr_132.g22673,Sc4wPfr_568.1.g2495,Sc4wPfr_363.3.g30509,Sc4wPfr_691.g31371,Sc4wPfr_305.g4585,Sc4wPfr_850.1.g5716,Sc4wPfr_38.g5810	13	Sc4wPfr_773.g11727,Sc4wPfr_59.2.g12418,Sc4wPfr_1402.g13915,Sc4wPfr_1061.g18817,Sc4wPfr_1061.g18818,Sc4wPfr_1096.g19446,Sc4wPfr_132.g22673,Sc4wPfr_568.1.g2495,Sc4wPfr_363.3.g30509,Sc4wPfr_691.g31371,Sc4wPfr_305.g4585,Sc4wPfr_850.1.g5716,Sc4wPfr_38.g5810	3.8634e-07	0.00100563	12215	5	16	12303	2675.33	9627.67	99.2847	12.8292	0.0865207
GO:0044326	dendritic spine neck	11	Sc4wPfr_804.g24119,Sc4wPfr_804.g24119,Sc4wPfr_4146.g26959,Sc4wPfr_98.g2686,Sc4wPfr_98.g2699,Sc4wPfr_98.g2700,Sc4wPfr_759.g27583,Sc4wPfr_830.g6317,Sc4wPfr_830.g6318,Sc4wPfr_830.g6319,Sc4wPfr_830.g6320	10	Sc4wPfr_804.g24119,Sc4wPfr_4146.g26959,Sc4wPfr_98.g2686,Sc4wPfr_98.g2699,Sc4wPfr_98.g2700,Sc4wPfr_759.g27583,Sc4wPfr_830.g6317,Sc4wPfr_830.g6318,Sc4wPfr_830.g6319,Sc4wPfr_830.g6320	9.1534e-06	0.0208607	21424	17	57	21618	4880.33	16737.7	99.1026	45.2075	0.0863414
GO:1900182	positive regulation of protein localization to nucleus	12	Sc4wPfr_250.g16039,Sc4wPfr_250.g16039,Sc4wPfr_854.g18446,Sc4wPfr_10.g18961,Sc4wPfr_10.g18961,Sc4wPfr_384.g24823,Sc4wPfr_224.1.g33421,Sc4wPfr_253.1.g5562,Sc4wPfr_941.g5940,Sc4wPfr_830.g6288,Sc4wPfr_830.g6290,Sc4wPfr_36.2.g7194	10	Sc4wPfr_250.g16039,Sc4wPfr_854.g18446,Sc4wPfr_10.g18961,Sc4wPfr_384.g24823,Sc4wPfr_224.1.g33421,Sc4wPfr_253.1.g5562,Sc4wPfr_941.g5940,Sc4wPfr_830.g6288,Sc4wPfr_830.g6290,Sc4wPfr_36.2.g7194	7.4783e-05	0.147546	18614	6	19	18773	4009.33	14662.7	99.153	15.2728	0.0860993
GO:1904837	beta-catenin-TCF complex assembly	32	Sc4wPfr_85.g928,Sc4wPfr_365.g14938,Sc4wPfr_352.g15735,Sc4wPfr_250.g16061,Sc4wPfr_854.g18446,Sc4wPfr_10.g18961,Sc4wPfr_10.g18961,Sc4wPfr_107.1.g20644,Sc4wPfr_846.1.g25647,Sc4wPfr_846.1.g25647,Sc4wPfr_39.1.g26768,Sc4wPfr_319.g27304,Sc4wPfr_319.g27364,Sc4wPfr_137.g27932,Sc4wPfr_287.2.g28216,Sc4wPfr_287.2.g28216,Sc4wPfr_199.g28684,Sc4wPfr_886.g29504,Sc4wPfr_488.g29949,Sc4wPfr_363.3.g30473,Sc4wPfr_363…	27	Sc4wPfr_85.g928,Sc4wPfr_365.g14938,Sc4wPfr_250.g16061,Sc4wPfr_854.g18446,Sc4wPfr_10.g18961,Sc4wPfr_107.1.g20644,Sc4wPfr_846.1.g25647,Sc4wPfr_39.1.g26768,Sc4wPfr_319.g27364,Sc4wPfr_137.g27932,Sc4wPfr_287.2.g28216,Sc4wPfr_199.g28684,Sc4wPfr_886.g29504,Sc4wPfr_488.g29949,Sc4wPfr_363.3.g30473,Sc4wPfr_363.3.g30474,Sc4wPfr_381.1.g32154,Sc4wPfr_651.1.g32671,Sc4wPfr_651.1.g32672,Sc4wPfr_651.1.g32673,Sc4w…	1.0347e-09	3.0359e-06	69900	32	102	70251	15176.5	55074.5	99.5004	81.8623	0.0860966
GO:0061351	neural precursor cell proliferation	8	Sc4wPfr_297.g13154,Sc4wPfr_297.g13154,Sc4wPfr_297.g13154,Sc4wPfr_297.g13154,Sc4wPfr_455.g20373,Sc4wPfr_656.g21061,Sc4wPfr_118.g25034,Sc4wPfr_1055.g27064	3	Sc4wPfr_297.g13154,Sc4wPfr_118.g25034,Sc4wPfr_1055.g27064	0.290168	1	10120	4	13	10215	2229.67	7985.33	99.07	10.3855	0.0856081
GO:0000307	cyclin-dependent protein kinase holoenzyme complex	9	Sc4wPfr_10.g18954,Sc4wPfr_10.g18969,Sc4wPfr_899.g22596,Sc4wPfr_68.g2386,Sc4wPfr_156.1.g4093,Sc4wPfr_850.1.g5728,Sc4wPfr_719.g8344,Sc4wPfr_1373.g9101,Sc4wPfr_1373.g9102	9	Sc4wPfr_10.g18954,Sc4wPfr_10.g18969,Sc4wPfr_899.g22596,Sc4wPfr_68.g2386,Sc4wPfr_156.1.g4093,Sc4wPfr_850.1.g5728,Sc4wPfr_719.g8344,Sc4wPfr_1373.g9101,Sc4wPfr_1373.g9102	0	0	10977	8	26	11040	2409.17	8630.83	99.4293	20.771	0.085321
GO:0005844	polysome	28	Sc4wPfr_552.g10540,Sc4wPfr_103.3.g10565,Sc4wPfr_433.g11150,Sc4wPfr_433.g11153,Sc4wPfr_90.g1171,Sc4wPfr_96.g11941,Sc4wPfr_27.g12181,Sc4wPfr_423.g13425,Sc4wPfr_1080.g15231,Sc4wPfr_489.2.g16699,Sc4wPfr_262.g16770,Sc4wPfr_328.g18062,Sc4wPfr_484.g18365,Sc4wPfr_3650.g20569,Sc4wPfr_1556.g21979,Sc4wPfr_899.g22597,Sc4wPfr_899.g22597,Sc4wPfr_412.g24350,Sc4wPfr_384.g24822,Sc4wPfr_1163.g25198,Sc4wPfr_226.1.g…	26	Sc4wPfr_552.g10540,Sc4wPfr_103.3.g10565,Sc4wPfr_433.g11150,Sc4wPfr_433.g11153,Sc4wPfr_90.g1171,Sc4wPfr_96.g11941,Sc4wPfr_27.g12181,Sc4wPfr_423.g13425,Sc4wPfr_1080.g15231,Sc4wPfr_489.2.g16699,Sc4wPfr_262.g16770,Sc4wPfr_328.g18062,Sc4wPfr_484.g18365,Sc4wPfr_3650.g20569,Sc4wPfr_1556.g21979,Sc4wPfr_899.g22597,Sc4wPfr_412.g24350,Sc4wPfr_384.g24822,Sc4wPfr_1163.g25198,Sc4wPfr_226.1.g26839,Sc4wPfr_1715.…	7.897e-12	2.4275e-08	30123	12	40	30585	6772.5	23812.5	98.4895	31.7674	0.085015
GO:0000151	ubiquitin ligase complex	65	Sc4wPfr_558.1.g10141,Sc4wPfr_272.g11371,Sc4wPfr_272.g11372,Sc4wPfr_923.g11435,Sc4wPfr_923.g11437,Sc4wPfr_73.g11515,Sc4wPfr_73.g11563,Sc4wPfr_96.g11925,Sc4wPfr_59.2.g12523,Sc4wPfr_574.g14571,Sc4wPfr_635.g14758,Sc4wPfr_1127.1.g1457,Sc4wPfr_244.2.g15119,Sc4wPfr_1153.g15528,Sc4wPfr_17.g15858,Sc4wPfr_17.g15858,Sc4wPfr_776.g16567,Sc4wPfr_519.g18026,Sc4wPfr_224.g18152,Sc4wPfr_10.g18894,Sc4wPfr_10.g18894…	56	Sc4wPfr_558.1.g10141,Sc4wPfr_272.g11372,Sc4wPfr_923.g11435,Sc4wPfr_923.g11437,Sc4wPfr_73.g11515,Sc4wPfr_73.g11563,Sc4wPfr_96.g11925,Sc4wPfr_59.2.g12523,Sc4wPfr_574.g14571,Sc4wPfr_635.g14758,Sc4wPfr_1127.1.g1457,Sc4wPfr_1153.g15528,Sc4wPfr_17.g15858,Sc4wPfr_776.g16567,Sc4wPfr_519.g18026,Sc4wPfr_224.g18152,Sc4wPfr_10.g18894,Sc4wPfr_66.g19026,Sc4wPfr_66.g19077,Sc4wPfr_66.g19079,Sc4wPfr_347.g19264,Sc…	1.2989e-18	4.293e-15	75210	99	318	75844	16386	59406	99.1641	254.75	0.0848503
GO:0051481	negative regulation of cytosolic calcium ion concentration	14	Sc4wPfr_98.g2686,Sc4wPfr_98.g2687,Sc4wPfr_98.g2688,Sc4wPfr_98.g2699,Sc4wPfr_98.g2700,Sc4wPfr_759.g27583,Sc4wPfr_137.g27950,Sc4wPfr_137.g27953,Sc4wPfr_85.1.g31254,Sc4wPfr_156.1.g4073,Sc4wPfr_830.g6317,Sc4wPfr_830.g6318,Sc4wPfr_830.g6319,Sc4wPfr_830.g6320	14	Sc4wPfr_98.g2686,Sc4wPfr_98.g2687,Sc4wPfr_98.g2688,Sc4wPfr_98.g2699,Sc4wPfr_98.g2700,Sc4wPfr_759.g27583,Sc4wPfr_137.g27950,Sc4wPfr_137.g27953,Sc4wPfr_85.1.g31254,Sc4wPfr_156.1.g4073,Sc4wPfr_830.g6317,Sc4wPfr_830.g6318,Sc4wPfr_830.g6319,Sc4wPfr_830.g6320	0	0	20203	17	59	20655	4723.33	15931.7	97.8117	46.4293	0.0847718
GO:0031932	TORC2 complex	7	Sc4wPfr_6.g19156,Sc4wPfr_239.g21137,Sc4wPfr_239.g21138,Sc4wPfr_597.3.g29538,Sc4wPfr_562.1.g31088,Sc4wPfr_562.1.g31089,Sc4wPfr_706.2.g7983	7	Sc4wPfr_6.g19156,Sc4wPfr_239.g21137,Sc4wPfr_239.g21138,Sc4wPfr_597.3.g29538,Sc4wPfr_562.1.g31088,Sc4wPfr_562.1.g31089,Sc4wPfr_706.2.g7983	0	0	13236	8	27	13392	2985.67	10406.3	98.8351	21.3819	0.0845397
GO:0019433	triglyceride catabolic process	8	Sc4wPfr_180.g11658,Sc4wPfr_59.2.g12458,Sc4wPfr_226.g15124,Sc4wPfr_384.g24771,Sc4wPfr_82.1.g28992,Sc4wPfr_856.g31442,Sc4wPfr_1640.g33035,Sc4wPfr_850.1.g5734	8	Sc4wPfr_180.g11658,Sc4wPfr_59.2.g12458,Sc4wPfr_226.g15124,Sc4wPfr_384.g24771,Sc4wPfr_82.1.g28992,Sc4wPfr_856.g31442,Sc4wPfr_1640.g33035,Sc4wPfr_850.1.g5734	0	0	13738	8	27	13818	3066.17	10751.8	99.421	21.3819	0.0840413
GO:0014819	regulation of skeletal muscle contraction	3	Sc4wPfr_304.2.g12724,Sc4wPfr_224.g18074,Sc4wPfr_156.1.g4073	3	Sc4wPfr_304.2.g12724,Sc4wPfr_224.g18074,Sc4wPfr_156.1.g4073	0	0	10166	6	19	10239	2157.83	8081.17	99.287	15.2728	0.0838677
GO:0021670	lateral ventricle development	8	Sc4wPfr_1213.g1095,Sc4wPfr_304.2.g12724,Sc4wPfr_106.g23544,Sc4wPfr_106.g23544,Sc4wPfr_353.g28128,Sc4wPfr_353.g28129,Sc4wPfr_353.g28131,Sc4wPfr_1373.g9101	4	Sc4wPfr_1213.g1095,Sc4wPfr_304.2.g12724,Sc4wPfr_106.g23544,Sc4wPfr_1373.g9101	0.104232	1	15912	8	26	16050	3438	12573	99.1402	20.771	0.083747
GO:0048675	axon extension	20	Sc4wPfr_165.g10037,Sc4wPfr_165.g10037,Sc4wPfr_165.g10037,Sc4wPfr_165.g10038,Sc4wPfr_165.g10039,Sc4wPfr_165.g10041,Sc4wPfr_1909.g11468,Sc4wPfr_96.g11930,Sc4wPfr_484.g18336,Sc4wPfr_854.g18489,Sc4wPfr_854.g18489,Sc4wPfr_854.g18490,Sc4wPfr_787.g23244,Sc4wPfr_79.1.g29203,Sc4wPfr_363.2.g30343,Sc4wPfr_363.2.g30366,Sc4wPfr_305.g4586,Sc4wPfr_287.g9045,Sc4wPfr_287.g9045,Sc4wPfr_1373.g9101	15	Sc4wPfr_165.g10037,Sc4wPfr_165.g10038,Sc4wPfr_165.g10039,Sc4wPfr_165.g10041,Sc4wPfr_96.g11930,Sc4wPfr_484.g18336,Sc4wPfr_854.g18489,Sc4wPfr_854.g18490,Sc4wPfr_787.g23244,Sc4wPfr_79.1.g29203,Sc4wPfr_363.2.g30343,Sc4wPfr_363.2.g30366,Sc4wPfr_305.g4586,Sc4wPfr_287.g9045,Sc4wPfr_1373.g9101	4.6598e-05	0.0949203	19937	9	30	20352	4430.5	15831.5	97.9609	23.8256	0.0836082
GO:0045822	negative regulation of heart contraction	14	Sc4wPfr_106.g23543,Sc4wPfr_98.g2686,Sc4wPfr_98.g2687,Sc4wPfr_98.g2688,Sc4wPfr_98.g2699,Sc4wPfr_98.g2700,Sc4wPfr_759.g27583,Sc4wPfr_85.1.g31254,Sc4wPfr_1021.g3604,Sc4wPfr_1021.g3604,Sc4wPfr_830.g6317,Sc4wPfr_830.g6318,Sc4wPfr_830.g6319,Sc4wPfr_830.g6320	13	Sc4wPfr_106.g23543,Sc4wPfr_98.g2686,Sc4wPfr_98.g2687,Sc4wPfr_98.g2688,Sc4wPfr_98.g2699,Sc4wPfr_98.g2700,Sc4wPfr_759.g27583,Sc4wPfr_85.1.g31254,Sc4wPfr_1021.g3604,Sc4wPfr_830.g6317,Sc4wPfr_830.g6318,Sc4wPfr_830.g6319,Sc4wPfr_830.g6320	3.8634e-07	0.00100563	23432	18	63	23915	5431.33	18475.7	97.9803	49.4839	0.0833951
GO:0060291	long-term synaptic potentiation	12	Sc4wPfr_416.g17198,Sc4wPfr_384.g24823,Sc4wPfr_396.g3015,Sc4wPfr_628.g32849,Sc4wPfr_1788.g33563,Sc4wPfr_1788.g33564,Sc4wPfr_1788.g33565,Sc4wPfr_1788.g33566,Sc4wPfr_156.1.g4073,Sc4wPfr_830.g6288,Sc4wPfr_830.g6290,Sc4wPfr_910.1.g9200	11	Sc4wPfr_416.g17198,Sc4wPfr_384.g24823,Sc4wPfr_396.g3015,Sc4wPfr_628.g32849,Sc4wPfr_1788.g33563,Sc4wPfr_1788.g33564,Sc4wPfr_1788.g33566,Sc4wPfr_156.1.g4073,Sc4wPfr_830.g6288,Sc4wPfr_830.g6290,Sc4wPfr_910.1.g9200	3.1871e-06	0.00772563	10536	6	20	10855	2365.17	8470.83	97.0613	15.8837	0.0833302
GO:0006369	termination of RNA polymerase II transcription	83	Sc4wPfr_558.1.g10131,Sc4wPfr_322.g12149,Sc4wPfr_322.g12149,Sc4wPfr_322.g12150,Sc4wPfr_44.1.g12993,Sc4wPfr_44.1.g12994,Sc4wPfr_3075.g13311,Sc4wPfr_3075.g13313,Sc4wPfr_1402.g13900,Sc4wPfr_1402.g13903,Sc4wPfr_419.g14298,Sc4wPfr_419.g14301,Sc4wPfr_855.g14412,Sc4wPfr_855.g14412,Sc4wPfr_855.g14413,Sc4wPfr_855.g14414,Sc4wPfr_244.2.g15111,Sc4wPfr_572.g15444,Sc4wPfr_1384.g16098,Sc4wPfr_489.2.g16677,Sc4wPf…	71	Sc4wPfr_558.1.g10131,Sc4wPfr_322.g12149,Sc4wPfr_322.g12150,Sc4wPfr_44.1.g12993,Sc4wPfr_44.1.g12994,Sc4wPfr_3075.g13311,Sc4wPfr_3075.g13313,Sc4wPfr_1402.g13900,Sc4wPfr_1402.g13903,Sc4wPfr_419.g14298,Sc4wPfr_419.g14301,Sc4wPfr_855.g14412,Sc4wPfr_855.g14413,Sc4wPfr_855.g14414,Sc4wPfr_244.2.g15111,Sc4wPfr_572.g15444,Sc4wPfr_1384.g16098,Sc4wPfr_489.2.g16677,Sc4wPfr_26.g17283,Sc4wPfr_26.g17291,Sc4wPfr_…	1.4991e-22	5.028e-19	62853	28	97	63544	14205.8	49082.2	98.9126	76.364	0.0831974
GO:0006307	DNA dealkylation involved in DNA repair	7	Sc4wPfr_124.g12333,Sc4wPfr_854.g18487,Sc4wPfr_107.1.g20673,Sc4wPfr_588.g23913,Sc4wPfr_283.g24314,Sc4wPfr_283.g24317,Sc4wPfr_812.g31151	5	Sc4wPfr_854.g18487,Sc4wPfr_588.g23913,Sc4wPfr_283.g24314,Sc4wPfr_283.g24317,Sc4wPfr_812.g31151	0.00877484	1	13825	5	17	13896	3067.5	10828.5	99.4891	13.4401	0.0830351
GO:0086037	sodium:potassium-exchanging ATPase activity involved in regulation of cardiac muscle cell membrane potential	9	Sc4wPfr_4146.g26959,Sc4wPfr_98.g2686,Sc4wPfr_98.g2699,Sc4wPfr_98.g2700,Sc4wPfr_759.g27583,Sc4wPfr_830.g6317,Sc4wPfr_830.g6318,Sc4wPfr_830.g6319,Sc4wPfr_830.g6320	9	Sc4wPfr_4146.g26959,Sc4wPfr_98.g2686,Sc4wPfr_98.g2699,Sc4wPfr_98.g2700,Sc4wPfr_759.g27583,Sc4wPfr_830.g6317,Sc4wPfr_830.g6318,Sc4wPfr_830.g6319,Sc4wPfr_830.g6320	0	0	18362	16	57	18444	4232.5	14211.5	99.5554	44.5966	0.0829086
GO:0050847	progesterone receptor signaling pathway	7	Sc4wPfr_328.2.g12074,Sc4wPfr_107.1.g20655,Sc4wPfr_107.1.g20655,Sc4wPfr_162.1.g23866,Sc4wPfr_622.g24242,Sc4wPfr_622.g24242,Sc4wPfr_334.g26622	5	Sc4wPfr_328.2.g12074,Sc4wPfr_107.1.g20655,Sc4wPfr_162.1.g23866,Sc4wPfr_622.g24242,Sc4wPfr_334.g26622	0.00877484	1	14917	4	14	15363	3461.83	11901.2	97.0969	10.9964	0.0829034
GO:0031053	primary miRNA processing	13	Sc4wPfr_1944.g10852,Sc4wPfr_1944.g10853,Sc4wPfr_423.g13471,Sc4wPfr_1844.g14252,Sc4wPfr_32.g14522,Sc4wPfr_10.g18921,Sc4wPfr_698.2.g23075,Sc4wPfr_251.g2483,Sc4wPfr_137.g27950,Sc4wPfr_137.g27953,Sc4wPfr_126.2.g29262,Sc4wPfr_520.g29397,Sc4wPfr_115.g30167	10	Sc4wPfr_1944.g10852,Sc4wPfr_423.g13471,Sc4wPfr_1844.g14252,Sc4wPfr_32.g14522,Sc4wPfr_698.2.g23075,Sc4wPfr_251.g2483,Sc4wPfr_137.g27950,Sc4wPfr_137.g27953,Sc4wPfr_126.2.g29262,Sc4wPfr_115.g30167	0.00033144	0.552186	14204	5	17	14295	3142	11153	99.3634	13.4401	0.0825837
GO:0046513	ceramide biosynthetic process	8	Sc4wPfr_416.g17186,Sc4wPfr_332.g19467,Sc4wPfr_80.g19880,Sc4wPfr_370.g26389,Sc4wPfr_305.g4644,Sc4wPfr_582.g7524,Sc4wPfr_85.g864,Sc4wPfr_703.g8990	8	Sc4wPfr_416.g17186,Sc4wPfr_332.g19467,Sc4wPfr_80.g19880,Sc4wPfr_370.g26389,Sc4wPfr_305.g4644,Sc4wPfr_582.g7524,Sc4wPfr_85.g864,Sc4wPfr_703.g8990	0	0	10231	5	17	10296	2259	8037	99.3687	13.4401	0.0822878
GO:0031402	sodium ion binding	22	Sc4wPfr_1468.g12853,Sc4wPfr_292.g13103,Sc4wPfr_292.g13104,Sc4wPfr_1163.g25137,Sc4wPfr_4146.g26958,Sc4wPfr_4146.g26959,Sc4wPfr_98.g2686,Sc4wPfr_98.g2687,Sc4wPfr_98.g2688,Sc4wPfr_98.g2697,Sc4wPfr_98.g2699,Sc4wPfr_98.g2700,Sc4wPfr_759.g27583,Sc4wPfr_715.g30400,Sc4wPfr_481.g31594,Sc4wPfr_481.g31594,Sc4wPfr_1445.g4955,Sc4wPfr_1445.g4955,Sc4wPfr_830.g6317,Sc4wPfr_830.g6318,Sc4wPfr_830.g6319,Sc4wPfr_830…	20	Sc4wPfr_1468.g12853,Sc4wPfr_292.g13103,Sc4wPfr_292.g13104,Sc4wPfr_1163.g25137,Sc4wPfr_4146.g26958,Sc4wPfr_4146.g26959,Sc4wPfr_98.g2686,Sc4wPfr_98.g2687,Sc4wPfr_98.g2688,Sc4wPfr_98.g2697,Sc4wPfr_98.g2699,Sc4wPfr_98.g2700,Sc4wPfr_759.g27583,Sc4wPfr_715.g30400,Sc4wPfr_481.g31594,Sc4wPfr_1445.g4955,Sc4wPfr_830.g6317,Sc4wPfr_830.g6318,Sc4wPfr_830.g6319,Sc4wPfr_830.g6320	3.5137e-09	1.0148e-05	32693	26	93	32846	7499.83	25338.2	99.5342	72.6986	0.08212
GO:0006465	signal peptide processing	15	Sc4wPfr_720.g12276,Sc4wPfr_2241.g17579,Sc4wPfr_634.1.g17844,Sc4wPfr_634.1.g17845,Sc4wPfr_424.1.g2106,Sc4wPfr_424.1.g2106,Sc4wPfr_50.g22247,Sc4wPfr_384.g24903,Sc4wPfr_338.g25884,Sc4wPfr_44.g26901,Sc4wPfr_48.g30209,Sc4wPfr_48.g30211,Sc4wPfr_826.g32481,Sc4wPfr_259.g33657,Sc4wPfr_62.g4435	13	Sc4wPfr_720.g12276,Sc4wPfr_2241.g17579,Sc4wPfr_634.1.g17844,Sc4wPfr_634.1.g17845,Sc4wPfr_424.1.g2106,Sc4wPfr_50.g22247,Sc4wPfr_384.g24903,Sc4wPfr_338.g25884,Sc4wPfr_44.g26901,Sc4wPfr_48.g30209,Sc4wPfr_48.g30211,Sc4wPfr_259.g33657,Sc4wPfr_62.g4435	3.9121e-06	0.00928339	23476	10	34	23634	5166.83	18467.2	99.3315	26.8801	0.0819577
GO:0086036	regulation of cardiac muscle cell membrane potential	13	Sc4wPfr_320.1.g20946,Sc4wPfr_106.g23543,Sc4wPfr_4146.g26959,Sc4wPfr_98.g2686,Sc4wPfr_98.g2699,Sc4wPfr_98.g2700,Sc4wPfr_759.g27583,Sc4wPfr_208.g28882,Sc4wPfr_22.2.g32891,Sc4wPfr_830.g6317,Sc4wPfr_830.g6318,Sc4wPfr_830.g6319,Sc4wPfr_830.g6320	13	Sc4wPfr_320.1.g20946,Sc4wPfr_106.g23543,Sc4wPfr_4146.g26959,Sc4wPfr_98.g2686,Sc4wPfr_98.g2699,Sc4wPfr_98.g2700,Sc4wPfr_759.g27583,Sc4wPfr_208.g28882,Sc4wPfr_22.2.g32891,Sc4wPfr_830.g6317,Sc4wPfr_830.g6318,Sc4wPfr_830.g6319,Sc4wPfr_830.g6320	0	0	25155	19	68	25287	5757.67	19529.3	99.478	53.1494	0.0817793
GO:0010719	negative regulation of epithelial to mesenchymal transition	14	Sc4wPfr_27.g12217,Sc4wPfr_828.1.g12789,Sc4wPfr_326.g15694,Sc4wPfr_14.g1768,Sc4wPfr_14.g1768,Sc4wPfr_52.g22756,Sc4wPfr_588.g23875,Sc4wPfr_804.g24126,Sc4wPfr_943.g27067,Sc4wPfr_199.g28711,Sc4wPfr_1269.g30708,Sc4wPfr_884.g31954,Sc4wPfr_884.g31954,Sc4wPfr_1036.g377	12	Sc4wPfr_27.g12217,Sc4wPfr_828.1.g12789,Sc4wPfr_326.g15694,Sc4wPfr_14.g1768,Sc4wPfr_52.g22756,Sc4wPfr_588.g23875,Sc4wPfr_804.g24126,Sc4wPfr_943.g27067,Sc4wPfr_199.g28711,Sc4wPfr_1269.g30708,Sc4wPfr_884.g31954,Sc4wPfr_1036.g377	1.0513e-05	0.0235703	12997	6	20	13083	2799	10236	99.3427	15.8837	0.0816745
GO:0051082	unfolded protein binding	97	Sc4wPfr_1452.g9909,Sc4wPfr_662.g1004,Sc4wPfr_388.1.g10262,Sc4wPfr_73.g11515,Sc4wPfr_773.g11727,Sc4wPfr_27.g12217,Sc4wPfr_27.g12218,Sc4wPfr_59.2.g12418,Sc4wPfr_161.1.g12910,Sc4wPfr_1010.g13508,Sc4wPfr_1402.g13909,Sc4wPfr_1402.g13915,Sc4wPfr_635.g14707,Sc4wPfr_326.g15644,Sc4wPfr_172.1.g1580,Sc4wPfr_172.1.g1589,Sc4wPfr_237.2.g16168,Sc4wPfr_489.2.g16713,Sc4wPfr_16.3.g17416,Sc4wPfr_221.g17485,Sc4wPfr_…	86	Sc4wPfr_662.g1004,Sc4wPfr_388.1.g10262,Sc4wPfr_73.g11515,Sc4wPfr_773.g11727,Sc4wPfr_27.g12217,Sc4wPfr_27.g12218,Sc4wPfr_59.2.g12418,Sc4wPfr_161.1.g12910,Sc4wPfr_1010.g13508,Sc4wPfr_1402.g13915,Sc4wPfr_635.g14707,Sc4wPfr_326.g15644,Sc4wPfr_172.1.g1580,Sc4wPfr_237.2.g16168,Sc4wPfr_489.2.g16713,Sc4wPfr_16.3.g17416,Sc4wPfr_221.g17485,Sc4wPfr_236.g17565,Sc4wPfr_208.2.g17707,Sc4wPfr_519.g17979,Sc4wPfr_…	2.2288e-29	7.5914e-26	122372	160	534	123119	26627.7	96483.3	99.3933	423.973	0.081671
GO:0019082	viral protein processing	6	Sc4wPfr_634.1.g17845,Sc4wPfr_424.1.g2106,Sc4wPfr_424.1.g2106,Sc4wPfr_338.g25884,Sc4wPfr_44.g26901,Sc4wPfr_48.g30209	5	Sc4wPfr_634.1.g17845,Sc4wPfr_424.1.g2106,Sc4wPfr_338.g25884,Sc4wPfr_44.g26901,Sc4wPfr_48.g30209	0.00178704	1	11042	5	17	11151	2423.83	8727.17	99.0225	13.4401	0.0813351
GO:0004532	exoribonuclease activity	6	Sc4wPfr_2074.g13190,Sc4wPfr_1384.g16099,Sc4wPfr_520.g29445,Sc4wPfr_691.g31328,Sc4wPfr_38.g5828,Sc4wPfr_85.g891	6	Sc4wPfr_2074.g13190,Sc4wPfr_1384.g16099,Sc4wPfr_520.g29445,Sc4wPfr_691.g31328,Sc4wPfr_38.g5828,Sc4wPfr_85.g891	0	0	11056	5	17	11127	2414.33	8712.67	99.3619	13.4401	0.0811497
GO:0071558	histone demethylase activity (H3-K27 specific)	8	Sc4wPfr_20.g15628,Sc4wPfr_132.g22645,Sc4wPfr_132.g22645,Sc4wPfr_132.g22646,Sc4wPfr_106.g23544,Sc4wPfr_106.g23544,Sc4wPfr_353.g28187,Sc4wPfr_396.g3060	6	Sc4wPfr_20.g15628,Sc4wPfr_132.g22645,Sc4wPfr_132.g22646,Sc4wPfr_106.g23544,Sc4wPfr_353.g28187,Sc4wPfr_396.g3060	0.00346188	1	11104	4	13	11196	2329.67	8827.33	99.1783	10.3855	0.0809266
GO:0032728	positive regulation of interferon-beta production	19	Sc4wPfr_161.1.g12906,Sc4wPfr_161.1.g12909,Sc4wPfr_2009.g19352,Sc4wPfr_479.g19776,Sc4wPfr_479.g19777,Sc4wPfr_1127.g22576,Sc4wPfr_568.g22806,Sc4wPfr_199.g28712,Sc4wPfr_199.g28712,Sc4wPfr_199.g28712,Sc4wPfr_1107.1.g29888,Sc4wPfr_1626.g30665,Sc4wPfr_861.g31120,Sc4wPfr_1045.g32638,Sc4wPfr_1045.g32638,Sc4wPfr_383.g33538,Sc4wPfr_200.g3485,Sc4wPfr_390.g5593,Sc4wPfr_390.g5594	16	Sc4wPfr_161.1.g12906,Sc4wPfr_161.1.g12909,Sc4wPfr_2009.g19352,Sc4wPfr_479.g19776,Sc4wPfr_479.g19777,Sc4wPfr_1127.g22576,Sc4wPfr_568.g22806,Sc4wPfr_199.g28712,Sc4wPfr_1107.1.g29888,Sc4wPfr_1626.g30665,Sc4wPfr_861.g31120,Sc4wPfr_1045.g32638,Sc4wPfr_383.g33538,Sc4wPfr_200.g3485,Sc4wPfr_390.g5593,Sc4wPfr_390.g5594	1.2567e-06	0.00314172	23201	12	42	23691	5240.33	18450.7	97.9317	32.9893	0.0807488
GO:1902895	positive regulation of pri-miRNA transcription by RNA polymerase II	14	Sc4wPfr_569.g11124,Sc4wPfr_208.1.g13279,Sc4wPfr_119.1.g1450,Sc4wPfr_467.g16213,Sc4wPfr_134.g20086,Sc4wPfr_68.g2328,Sc4wPfr_384.g24863,Sc4wPfr_137.g27950,Sc4wPfr_137.g27953,Sc4wPfr_715.g30425,Sc4wPfr_85.1.g31226,Sc4wPfr_594.g3249,Sc4wPfr_383.g33542,Sc4wPfr_383.g33543	14	Sc4wPfr_569.g11124,Sc4wPfr_208.1.g13279,Sc4wPfr_119.1.g1450,Sc4wPfr_467.g16213,Sc4wPfr_134.g20086,Sc4wPfr_68.g2328,Sc4wPfr_384.g24863,Sc4wPfr_137.g27950,Sc4wPfr_137.g27953,Sc4wPfr_715.g30425,Sc4wPfr_85.1.g31226,Sc4wPfr_594.g3249,Sc4wPfr_383.g33542,Sc4wPfr_383.g33543	0	0	16028	5	17	16119	3468.17	12650.8	99.4354	13.4401	0.0803884
GO:0007512	adult heart development	7	Sc4wPfr_122.g9841,Sc4wPfr_304.2.g12724,Sc4wPfr_107.1.g20637,Sc4wPfr_1556.g21993,Sc4wPfr_1556.g21994,Sc4wPfr_1556.g21995,Sc4wPfr_884.g31954	6	Sc4wPfr_304.2.g12724,Sc4wPfr_107.1.g20637,Sc4wPfr_1556.g21993,Sc4wPfr_1556.g21994,Sc4wPfr_1556.g21995,Sc4wPfr_884.g31954	0.0006224	0.964724	13527	6	19	13597	2761.67	10804.3	99.4852	15.2728	0.0803771
GO:0032804	negative regulation of low-density lipoprotein particle receptor catabolic process	10	Sc4wPfr_634.1.g17845,Sc4wPfr_424.1.g2106,Sc4wPfr_424.1.g2106,Sc4wPfr_384.g24903,Sc4wPfr_338.g25884,Sc4wPfr_44.g26901,Sc4wPfr_48.g30209,Sc4wPfr_48.g30211,Sc4wPfr_826.g32481,Sc4wPfr_62.g4435	8	Sc4wPfr_634.1.g17845,Sc4wPfr_424.1.g2106,Sc4wPfr_384.g24903,Sc4wPfr_338.g25884,Sc4wPfr_44.g26901,Sc4wPfr_48.g30209,Sc4wPfr_48.g30211,Sc4wPfr_62.g4435	0.00051829	0.832378	20718	9	31	20853	4532.67	16320.3	99.3526	24.4365	0.080293
GO:0032904	negative regulation of nerve growth factor production	10	Sc4wPfr_634.1.g17845,Sc4wPfr_424.1.g2106,Sc4wPfr_424.1.g2106,Sc4wPfr_384.g24903,Sc4wPfr_338.g25884,Sc4wPfr_44.g26901,Sc4wPfr_48.g30209,Sc4wPfr_48.g30211,Sc4wPfr_826.g32481,Sc4wPfr_62.g4435	8	Sc4wPfr_634.1.g17845,Sc4wPfr_424.1.g2106,Sc4wPfr_384.g24903,Sc4wPfr_338.g25884,Sc4wPfr_44.g26901,Sc4wPfr_48.g30209,Sc4wPfr_48.g30211,Sc4wPfr_62.g4435	0.00051829	0.832378	20718	9	31	20853	4532.67	16320.3	99.3526	24.4365	0.080293
GO:0032911	negative regulation of transforming growth factor beta1 production	10	Sc4wPfr_634.1.g17845,Sc4wPfr_424.1.g2106,Sc4wPfr_424.1.g2106,Sc4wPfr_384.g24903,Sc4wPfr_338.g25884,Sc4wPfr_44.g26901,Sc4wPfr_48.g30209,Sc4wPfr_48.g30211,Sc4wPfr_826.g32481,Sc4wPfr_62.g4435	8	Sc4wPfr_634.1.g17845,Sc4wPfr_424.1.g2106,Sc4wPfr_384.g24903,Sc4wPfr_338.g25884,Sc4wPfr_44.g26901,Sc4wPfr_48.g30209,Sc4wPfr_48.g30211,Sc4wPfr_62.g4435	0.00051829	0.832378	20718	9	31	20853	4532.67	16320.3	99.3526	24.4365	0.080293
GO:0001541	ovarian follicle development	13	Sc4wPfr_158.2.g10604,Sc4wPfr_802.g11764,Sc4wPfr_292.g13058,Sc4wPfr_1091.g16442,Sc4wPfr_622.g24231,Sc4wPfr_546.g25835,Sc4wPfr_520.g29394,Sc4wPfr_363.3.g30478,Sc4wPfr_363.3.g30507,Sc4wPfr_561.1.g3847,Sc4wPfr_232.g4550,Sc4wPfr_390.g5578,Sc4wPfr_589.g5993	11	Sc4wPfr_158.2.g10604,Sc4wPfr_292.g13058,Sc4wPfr_1091.g16442,Sc4wPfr_622.g24231,Sc4wPfr_546.g25835,Sc4wPfr_520.g29394,Sc4wPfr_363.3.g30478,Sc4wPfr_363.3.g30507,Sc4wPfr_561.1.g3847,Sc4wPfr_232.g4550,Sc4wPfr_589.g5993	2.8117e-05	0.0589327	15388	6	21	15456	3399.33	12056.7	99.56	16.4946	0.0802505
GO:0035357	peroxisome proliferator activated receptor signaling pathway	10	Sc4wPfr_618.g14865,Sc4wPfr_352.g15734,Sc4wPfr_224.g18100,Sc4wPfr_135.g21755,Sc4wPfr_364.g29945,Sc4wPfr_948.g31562,Sc4wPfr_1007.g33088,Sc4wPfr_240.g3640,Sc4wPfr_240.g3640,Sc4wPfr_11.g7395	4	Sc4wPfr_618.g14865,Sc4wPfr_224.g18100,Sc4wPfr_1007.g33088,Sc4wPfr_11.g7395	0.244984	1	11690	5	17	11757	2522.5	9234.5	99.4301	13.4401	0.0800087
GO:0031947	negative regulation of glucocorticoid biosynthetic process	8	Sc4wPfr_98.g2687,Sc4wPfr_98.g2699,Sc4wPfr_98.g2700,Sc4wPfr_759.g27583,Sc4wPfr_830.g6317,Sc4wPfr_830.g6318,Sc4wPfr_830.g6319,Sc4wPfr_830.g6320	8	Sc4wPfr_98.g2687,Sc4wPfr_98.g2699,Sc4wPfr_98.g2700,Sc4wPfr_759.g27583,Sc4wPfr_830.g6317,Sc4wPfr_830.g6318,Sc4wPfr_830.g6319,Sc4wPfr_830.g6320	0	0	16081	14	52	16155	3709.17	12445.8	99.5419	40.3202	0.0795448
GO:0045989	positive regulation of striated muscle contraction	8	Sc4wPfr_98.g2687,Sc4wPfr_98.g2699,Sc4wPfr_98.g2700,Sc4wPfr_759.g27583,Sc4wPfr_830.g6317,Sc4wPfr_830.g6318,Sc4wPfr_830.g6319,Sc4wPfr_830.g6320	8	Sc4wPfr_98.g2687,Sc4wPfr_98.g2699,Sc4wPfr_98.g2700,Sc4wPfr_759.g27583,Sc4wPfr_830.g6317,Sc4wPfr_830.g6318,Sc4wPfr_830.g6319,Sc4wPfr_830.g6320	0	0	16081	14	52	16155	3709.17	12445.8	99.5419	40.3202	0.0795448
GO:0030553	cGMP binding	13	Sc4wPfr_1300.g9815,Sc4wPfr_351.g11300,Sc4wPfr_351.g11300,Sc4wPfr_328.2.g12084,Sc4wPfr_828.1.g12769,Sc4wPfr_250.g16028,Sc4wPfr_250.g16040,Sc4wPfr_455.g20394,Sc4wPfr_455.g20395,Sc4wPfr_954.g27087,Sc4wPfr_954.g27088,Sc4wPfr_147.g8592,Sc4wPfr_147.g8592	9	Sc4wPfr_1300.g9815,Sc4wPfr_351.g11300,Sc4wPfr_328.2.g12084,Sc4wPfr_828.1.g12769,Sc4wPfr_250.g16028,Sc4wPfr_250.g16040,Sc4wPfr_455.g20394,Sc4wPfr_455.g20395,Sc4wPfr_147.g8592	0.0024131	1	15538	10	34	15693	3334.17	12346.8	99.0123	26.8801	0.0789256
GO:0016461	unconventional myosin complex	10	Sc4wPfr_423.g13470,Sc4wPfr_138.g13929,Sc4wPfr_262.2.g17788,Sc4wPfr_586.g22381,Sc4wPfr_363.2.g30345,Sc4wPfr_363.2.g30345,Sc4wPfr_363.2.g30377,Sc4wPfr_9.g31801,Sc4wPfr_9.g31802,Sc4wPfr_259.g33646	9	Sc4wPfr_423.g13470,Sc4wPfr_138.g13929,Sc4wPfr_262.2.g17788,Sc4wPfr_586.g22381,Sc4wPfr_363.2.g30345,Sc4wPfr_363.2.g30377,Sc4wPfr_9.g31801,Sc4wPfr_9.g31802,Sc4wPfr_259.g33646	2.6287e-05	0.0563331	13820	4	14	13978	3026.33	10935.7	98.8697	10.9964	0.0788436
GO:0010248	establishment or maintenance of transmembrane electrochemical gradient	20	Sc4wPfr_304.2.g12724,Sc4wPfr_1468.g12853,Sc4wPfr_292.g13103,Sc4wPfr_292.g13104,Sc4wPfr_4146.g26958,Sc4wPfr_4146.g26959,Sc4wPfr_98.g2686,Sc4wPfr_98.g2687,Sc4wPfr_98.g2688,Sc4wPfr_98.g2697,Sc4wPfr_98.g2699,Sc4wPfr_98.g2700,Sc4wPfr_759.g27583,Sc4wPfr_62.g4470,Sc4wPfr_62.g4471,Sc4wPfr_830.g6317,Sc4wPfr_830.g6318,Sc4wPfr_830.g6319,Sc4wPfr_830.g6320,Sc4wPfr_269.g7775	20	Sc4wPfr_304.2.g12724,Sc4wPfr_1468.g12853,Sc4wPfr_292.g13103,Sc4wPfr_292.g13104,Sc4wPfr_4146.g26958,Sc4wPfr_4146.g26959,Sc4wPfr_98.g2686,Sc4wPfr_98.g2687,Sc4wPfr_98.g2688,Sc4wPfr_98.g2697,Sc4wPfr_98.g2699,Sc4wPfr_98.g2700,Sc4wPfr_759.g27583,Sc4wPfr_62.g4470,Sc4wPfr_62.g4471,Sc4wPfr_830.g6317,Sc4wPfr_830.g6318,Sc4wPfr_830.g6319,Sc4wPfr_830.g6320,Sc4wPfr_269.g7775	0	0	33092	28	102	33249	7460	25789	99.5278	79.4186	0.0787386
GO:0051946	regulation of glutamate uptake involved in transmission of nerve impulse	13	Sc4wPfr_292.g13103,Sc4wPfr_292.g13104,Sc4wPfr_4146.g26959,Sc4wPfr_98.g2686,Sc4wPfr_98.g2687,Sc4wPfr_98.g2688,Sc4wPfr_98.g2699,Sc4wPfr_98.g2700,Sc4wPfr_759.g27583,Sc4wPfr_830.g6317,Sc4wPfr_830.g6318,Sc4wPfr_830.g6319,Sc4wPfr_830.g6320	13	Sc4wPfr_292.g13103,Sc4wPfr_292.g13104,Sc4wPfr_4146.g26959,Sc4wPfr_98.g2686,Sc4wPfr_98.g2687,Sc4wPfr_98.g2688,Sc4wPfr_98.g2699,Sc4wPfr_98.g2700,Sc4wPfr_759.g27583,Sc4wPfr_830.g6317,Sc4wPfr_830.g6318,Sc4wPfr_830.g6319,Sc4wPfr_830.g6320	0	0	22496	16	60	22599	5176.17	17422.8	99.5442	46.4293	0.0786586
GO:1903280	negative regulation of calcium:sodium antiporter activity	13	Sc4wPfr_292.g13103,Sc4wPfr_292.g13104,Sc4wPfr_4146.g26959,Sc4wPfr_98.g2686,Sc4wPfr_98.g2687,Sc4wPfr_98.g2688,Sc4wPfr_98.g2699,Sc4wPfr_98.g2700,Sc4wPfr_759.g27583,Sc4wPfr_830.g6317,Sc4wPfr_830.g6318,Sc4wPfr_830.g6319,Sc4wPfr_830.g6320	13	Sc4wPfr_292.g13103,Sc4wPfr_292.g13104,Sc4wPfr_4146.g26959,Sc4wPfr_98.g2686,Sc4wPfr_98.g2687,Sc4wPfr_98.g2688,Sc4wPfr_98.g2699,Sc4wPfr_98.g2700,Sc4wPfr_759.g27583,Sc4wPfr_830.g6317,Sc4wPfr_830.g6318,Sc4wPfr_830.g6319,Sc4wPfr_830.g6320	0	0	22496	16	60	22599	5176.17	17422.8	99.5442	46.4293	0.0786586
GO:0008187	poly-pyrimidine tract binding	9	Sc4wPfr_1309.1.g9692,Sc4wPfr_322.g12149,Sc4wPfr_322.g12150,Sc4wPfr_1630.1.g20720,Sc4wPfr_908.g21208,Sc4wPfr_255.g21690,Sc4wPfr_41.g30762,Sc4wPfr_582.g7488,Sc4wPfr_582.g7488	8	Sc4wPfr_1309.1.g9692,Sc4wPfr_322.g12149,Sc4wPfr_322.g12150,Sc4wPfr_1630.1.g20720,Sc4wPfr_908.g21208,Sc4wPfr_255.g21690,Sc4wPfr_41.g30762,Sc4wPfr_582.g7488	7.5488e-05	0.147546	10300	3	11	10397	2327.67	8058.33	99.067	8.55277	0.0785489
GO:0030890	positive regulation of B cell proliferation	10	Sc4wPfr_155.g16875,Sc4wPfr_155.g16876,Sc4wPfr_144.2.g1703,Sc4wPfr_224.g18155,Sc4wPfr_107.1.g20637,Sc4wPfr_1009.1.g20986,Sc4wPfr_47.1.g2186,Sc4wPfr_132.g22655,Sc4wPfr_475.1.g23416,Sc4wPfr_1787.g2666	9	Sc4wPfr_155.g16875,Sc4wPfr_155.g16876,Sc4wPfr_224.g18155,Sc4wPfr_107.1.g20637,Sc4wPfr_1009.1.g20986,Sc4wPfr_47.1.g2186,Sc4wPfr_132.g22655,Sc4wPfr_475.1.g23416,Sc4wPfr_1787.g2666	2.6287e-05	0.0563331	12502	7	24	12705	2703.83	10001.2	98.4022	18.9383	0.0784217
GO:0009408	response to heat	50	Sc4wPfr_662.g1004,Sc4wPfr_388.1.g10262,Sc4wPfr_1515.g11095,Sc4wPfr_73.g11515,Sc4wPfr_59.2.g12418,Sc4wPfr_292.g13058,Sc4wPfr_1402.g13915,Sc4wPfr_483.g14168,Sc4wPfr_635.g14707,Sc4wPfr_634.1.g17889,Sc4wPfr_519.g17979,Sc4wPfr_519.g17992,Sc4wPfr_239.g21065,Sc4wPfr_760.g24157,Sc4wPfr_622.g24231,Sc4wPfr_293.g24400,Sc4wPfr_56.g24513,Sc4wPfr_391.g24693,Sc4wPfr_674.1.g25729,Sc4wPfr_289.g2548,Sc4wPfr_2327.g…	41	Sc4wPfr_662.g1004,Sc4wPfr_388.1.g10262,Sc4wPfr_1515.g11095,Sc4wPfr_73.g11515,Sc4wPfr_59.2.g12418,Sc4wPfr_292.g13058,Sc4wPfr_1402.g13915,Sc4wPfr_483.g14168,Sc4wPfr_635.g14707,Sc4wPfr_634.1.g17889,Sc4wPfr_519.g17979,Sc4wPfr_239.g21065,Sc4wPfr_760.g24157,Sc4wPfr_622.g24231,Sc4wPfr_293.g24400,Sc4wPfr_56.g24513,Sc4wPfr_391.g24693,Sc4wPfr_674.1.g25729,Sc4wPfr_289.g2548,Sc4wPfr_520.g29394,Sc4wPfr_364.g2…	1.0894e-12	3.4001e-09	55705	110	382	56532	12243.2	44222.8	98.5371	300.569	0.0781814
GO:0036091	positive regulation of transcription from RNA polymerase II promoter in response to oxidative stress	4	Sc4wPfr_113.1.g28368,Sc4wPfr_199.g28606,Sc4wPfr_1514.g5393,Sc4wPfr_1514.g5394	4	Sc4wPfr_113.1.g28368,Sc4wPfr_199.g28606,Sc4wPfr_1514.g5393,Sc4wPfr_1514.g5394	0	0	11731	5	17	11769	2475.67	9293.33	99.6771	13.4401	0.0780193
GO:0032956	regulation of actin cytoskeleton organization	28	Sc4wPfr_292.g13064,Sc4wPfr_397.g1305,Sc4wPfr_397.g1305,Sc4wPfr_423.g13436,Sc4wPfr_423.g13436,Sc4wPfr_855.g14411,Sc4wPfr_32.g14550,Sc4wPfr_224.g18074,Sc4wPfr_224.g18121,Sc4wPfr_224.g18122,Sc4wPfr_656.g21061,Sc4wPfr_239.g21137,Sc4wPfr_239.g21138,Sc4wPfr_899.g22617,Sc4wPfr_520.g29421,Sc4wPfr_263.1.g30945,Sc4wPfr_263.1.g30945,Sc4wPfr_562.1.g31088,Sc4wPfr_1788.g33563,Sc4wPfr_839.g3985,Sc4wPfr_246.g430…	22	Sc4wPfr_292.g13064,Sc4wPfr_397.g1305,Sc4wPfr_423.g13436,Sc4wPfr_32.g14550,Sc4wPfr_224.g18074,Sc4wPfr_224.g18121,Sc4wPfr_224.g18122,Sc4wPfr_239.g21137,Sc4wPfr_239.g21138,Sc4wPfr_899.g22617,Sc4wPfr_520.g29421,Sc4wPfr_263.1.g30945,Sc4wPfr_562.1.g31088,Sc4wPfr_1788.g33563,Sc4wPfr_839.g3985,Sc4wPfr_246.g4303,Sc4wPfr_850.1.g5723,Sc4wPfr_850.1.g5735,Sc4wPfr_36.2.g7204,Sc4wPfr_706.2.g7983,Sc4wPfr_703.g89…	3.761e-07	0.00098274	53277	29	101	53754	11477.5	42012.5	99.1126	79.4186	0.0780162
GO:0043548	phosphatidylinositol 3-kinase binding	13	Sc4wPfr_107.1.g20640,Sc4wPfr_198.g23253,Sc4wPfr_198.g23254,Sc4wPfr_98.g2687,Sc4wPfr_98.g2699,Sc4wPfr_98.g2700,Sc4wPfr_759.g27583,Sc4wPfr_263.1.g30945,Sc4wPfr_45.g3333,Sc4wPfr_830.g6317,Sc4wPfr_830.g6318,Sc4wPfr_830.g6319,Sc4wPfr_830.g6320	13	Sc4wPfr_107.1.g20640,Sc4wPfr_198.g23253,Sc4wPfr_198.g23254,Sc4wPfr_98.g2687,Sc4wPfr_98.g2699,Sc4wPfr_98.g2700,Sc4wPfr_759.g27583,Sc4wPfr_263.1.g30945,Sc4wPfr_45.g3333,Sc4wPfr_830.g6317,Sc4wPfr_830.g6318,Sc4wPfr_830.g6319,Sc4wPfr_830.g6320	0	0	24371	16	59	24501	5441.83	18795.2	99.4694	45.8184	0.077993
GO:1901838	positive regulation of transcription of nucleolar large rRNA by RNA polymerase I	8	Sc4wPfr_59.2.g12420,Sc4wPfr_59.2.g12422,Sc4wPfr_106.g23595,Sc4wPfr_384.g24863,Sc4wPfr_562.1.g31088,Sc4wPfr_562.1.g31089,Sc4wPfr_383.g33542,Sc4wPfr_383.g33543	8	Sc4wPfr_59.2.g12420,Sc4wPfr_59.2.g12422,Sc4wPfr_106.g23595,Sc4wPfr_384.g24863,Sc4wPfr_562.1.g31088,Sc4wPfr_562.1.g31089,Sc4wPfr_383.g33542,Sc4wPfr_383.g33543	0	0	16384	7	25	16545	3614.5	12930.5	99.0269	19.5492	0.0779359
GO:0006883	cellular sodium ion homeostasis	22	Sc4wPfr_165.g10034,Sc4wPfr_165.g10035,Sc4wPfr_1468.g12853,Sc4wPfr_292.g13103,Sc4wPfr_292.g13104,Sc4wPfr_4146.g26958,Sc4wPfr_4146.g26959,Sc4wPfr_98.g2686,Sc4wPfr_98.g2687,Sc4wPfr_98.g2688,Sc4wPfr_98.g2697,Sc4wPfr_98.g2699,Sc4wPfr_98.g2700,Sc4wPfr_759.g27583,Sc4wPfr_208.g28882,Sc4wPfr_156.1.g4068,Sc4wPfr_156.1.g4073,Sc4wPfr_62.g4468,Sc4wPfr_830.g6317,Sc4wPfr_830.g6318,Sc4wPfr_830.g6319,Sc4wPfr_830.…	22	Sc4wPfr_165.g10034,Sc4wPfr_165.g10035,Sc4wPfr_1468.g12853,Sc4wPfr_292.g13103,Sc4wPfr_292.g13104,Sc4wPfr_4146.g26958,Sc4wPfr_4146.g26959,Sc4wPfr_98.g2686,Sc4wPfr_98.g2687,Sc4wPfr_98.g2688,Sc4wPfr_98.g2697,Sc4wPfr_98.g2699,Sc4wPfr_98.g2700,Sc4wPfr_759.g27583,Sc4wPfr_208.g28882,Sc4wPfr_156.1.g4068,Sc4wPfr_156.1.g4073,Sc4wPfr_62.g4468,Sc4wPfr_830.g6317,Sc4wPfr_830.g6318,Sc4wPfr_830.g6319,Sc4wPfr_830.…	0	0	34897	26	98	35082	7968.33	27113.7	99.4727	75.7531	0.0773782
GO:0045211	postsynaptic membrane	31	Sc4wPfr_78.g10410,Sc4wPfr_78.g10420,Sc4wPfr_208.1.g13278,Sc4wPfr_1010.g13517,Sc4wPfr_963.g15309,Sc4wPfr_262.g16783,Sc4wPfr_224.g18122,Sc4wPfr_347.g19253,Sc4wPfr_107.1.g20653,Sc4wPfr_699.g21630,Sc4wPfr_135.g21790,Sc4wPfr_740.1.g22471,Sc4wPfr_385.g24424,Sc4wPfr_385.g24424,Sc4wPfr_384.g24880,Sc4wPfr_57.2.g24940,Sc4wPfr_1163.g25147,Sc4wPfr_176.g26287,Sc4wPfr_176.g26287,Sc4wPfr_587.g26422,Sc4wPfr_520.…	27	Sc4wPfr_78.g10410,Sc4wPfr_78.g10420,Sc4wPfr_208.1.g13278,Sc4wPfr_1010.g13517,Sc4wPfr_262.g16783,Sc4wPfr_224.g18122,Sc4wPfr_347.g19253,Sc4wPfr_107.1.g20653,Sc4wPfr_135.g21790,Sc4wPfr_740.1.g22471,Sc4wPfr_385.g24424,Sc4wPfr_384.g24880,Sc4wPfr_57.2.g24940,Sc4wPfr_1163.g25147,Sc4wPfr_176.g26287,Sc4wPfr_587.g26422,Sc4wPfr_520.g29444,Sc4wPfr_947.g29654,Sc4wPfr_1152.g30294,Sc4wPfr_363.2.g30366,Sc4wPfr_1…	1.9458e-10	5.8062e-07	36696	16	58	37098	8150.5	28947.5	98.9164	45.2075	0.0773316
GO:0032729	positive regulation of interferon-gamma production	11	Sc4wPfr_720.g12274,Sc4wPfr_163.g17460,Sc4wPfr_455.g20376,Sc4wPfr_68.g2360,Sc4wPfr_68.g2360,Sc4wPfr_113.1.g28312,Sc4wPfr_363.3.g30486,Sc4wPfr_65.g31659,Sc4wPfr_1021.g3604,Sc4wPfr_1021.g3604,Sc4wPfr_179.g7820	9	Sc4wPfr_720.g12274,Sc4wPfr_163.g17460,Sc4wPfr_455.g20376,Sc4wPfr_68.g2360,Sc4wPfr_113.1.g28312,Sc4wPfr_363.3.g30486,Sc4wPfr_65.g31659,Sc4wPfr_1021.g3604,Sc4wPfr_179.g7820	0.00019762	0.349793	10911	6	22	11375	2521.5	8845.5	95.9209	17.1055	0.0773256
GO:0001664	G protein-coupled receptor binding	33	Sc4wPfr_73.g11515,Sc4wPfr_180.g11679,Sc4wPfr_180.g11679,Sc4wPfr_1080.g15275,Sc4wPfr_313.g17059,Sc4wPfr_313.g17059,Sc4wPfr_262.2.g17805,Sc4wPfr_347.g19345,Sc4wPfr_347.g19345,Sc4wPfr_347.g19345,Sc4wPfr_347.g19345,Sc4wPfr_270.1.g19663,Sc4wPfr_422.g20156,Sc4wPfr_106.g23554,Sc4wPfr_251.g2463,Sc4wPfr_674.1.g25727,Sc4wPfr_268.g25761,Sc4wPfr_199.g28669,Sc4wPfr_199.g28670,Sc4wPfr_199.g28672,Sc4wPfr_886.g2…	20	Sc4wPfr_73.g11515,Sc4wPfr_313.g17059,Sc4wPfr_347.g19345,Sc4wPfr_270.1.g19663,Sc4wPfr_251.g2463,Sc4wPfr_674.1.g25727,Sc4wPfr_268.g25761,Sc4wPfr_199.g28669,Sc4wPfr_199.g28670,Sc4wPfr_199.g28672,Sc4wPfr_886.g29510,Sc4wPfr_364.g29946,Sc4wPfr_156.1.g4116,Sc4wPfr_62.g4430,Sc4wPfr_62.g4480,Sc4wPfr_325.1.g5301,Sc4wPfr_1044.g6839,Sc4wPfr_1044.g6841,Sc4wPfr_424.g725,Sc4wPfr_16.1.g8467	0.00069338	1	38512	77	271	38849	8413.83	30337.2	99.1325	212.598	0.0772288
GO:0005859	muscle myosin complex	10	Sc4wPfr_304.2.g12724,Sc4wPfr_304.2.g12725,Sc4wPfr_423.g13470,Sc4wPfr_138.g13929,Sc4wPfr_1556.g21993,Sc4wPfr_1556.g21994,Sc4wPfr_1556.g21995,Sc4wPfr_586.g22381,Sc4wPfr_624.g29791,Sc4wPfr_224.1.g33430	10	Sc4wPfr_304.2.g12724,Sc4wPfr_304.2.g12725,Sc4wPfr_423.g13470,Sc4wPfr_138.g13929,Sc4wPfr_1556.g21993,Sc4wPfr_1556.g21994,Sc4wPfr_1556.g21995,Sc4wPfr_586.g22381,Sc4wPfr_624.g29791,Sc4wPfr_224.1.g33430	0	0	15091	6	20	15189	3117.17	12071.8	99.3548	15.8837	0.0771592
GO:0045823	positive regulation of heart contraction	26	Sc4wPfr_514.g14435,Sc4wPfr_36.g16978,Sc4wPfr_484.g18317,Sc4wPfr_484.g18318,Sc4wPfr_1354.g22275,Sc4wPfr_475.1.g23415,Sc4wPfr_412.g24374,Sc4wPfr_98.g2687,Sc4wPfr_98.g2699,Sc4wPfr_98.g2700,Sc4wPfr_759.g27583,Sc4wPfr_488.g29970,Sc4wPfr_48.g30220,Sc4wPfr_691.g31351,Sc4wPfr_290.1.g3127,Sc4wPfr_417.3.g31869,Sc4wPfr_417.3.g31872,Sc4wPfr_826.g32499,Sc4wPfr_594.g3256,Sc4wPfr_173.2.g33022,Sc4wPfr_830.g6317,…	14	Sc4wPfr_514.g14435,Sc4wPfr_484.g18318,Sc4wPfr_412.g24374,Sc4wPfr_98.g2687,Sc4wPfr_98.g2699,Sc4wPfr_98.g2700,Sc4wPfr_759.g27583,Sc4wPfr_488.g29970,Sc4wPfr_417.3.g31869,Sc4wPfr_830.g6317,Sc4wPfr_830.g6318,Sc4wPfr_830.g6319,Sc4wPfr_830.g6320,Sc4wPfr_717.g8771	0.0142756	1	34676	21	80	34797	7936	26861	99.6523	61.7022	0.0770726
GO:1900034	regulation of cellular response to heat	63	Sc4wPfr_85.g928,Sc4wPfr_504.g10359,Sc4wPfr_524.g10739,Sc4wPfr_73.g11515,Sc4wPfr_144.1.g11742,Sc4wPfr_59.2.g12418,Sc4wPfr_2074.g13185,Sc4wPfr_2074.g13186,Sc4wPfr_1402.g13915,Sc4wPfr_1844.g14258,Sc4wPfr_1844.g14259,Sc4wPfr_1449.g14278,Sc4wPfr_32.g14556,Sc4wPfr_104.g15029,Sc4wPfr_945.g15378,Sc4wPfr_416.g17198,Sc4wPfr_416.g17198,Sc4wPfr_416.g17198,Sc4wPfr_519.g17979,Sc4wPfr_519.g17982,Sc4wPfr_519.g17…	52	Sc4wPfr_85.g928,Sc4wPfr_504.g10359,Sc4wPfr_524.g10739,Sc4wPfr_73.g11515,Sc4wPfr_59.2.g12418,Sc4wPfr_2074.g13185,Sc4wPfr_2074.g13186,Sc4wPfr_1402.g13915,Sc4wPfr_1844.g14258,Sc4wPfr_1844.g14259,Sc4wPfr_1449.g14278,Sc4wPfr_32.g14556,Sc4wPfr_104.g15029,Sc4wPfr_945.g15378,Sc4wPfr_416.g17198,Sc4wPfr_519.g17979,Sc4wPfr_519.g17982,Sc4wPfr_519.g17983,Sc4wPfr_519.g17988,Sc4wPfr_519.g17991,Sc4wPfr_519.g1799…	9.8751e-16	3.1995e-12	78679	135	476	79524	17124.7	62054.3	98.9374	373.267	0.0769188
GO:0003014	renal system process	7	Sc4wPfr_126.2.g29265,Sc4wPfr_126.2.g29266,Sc4wPfr_85.1.g31222,Sc4wPfr_383.g33503,Sc4wPfr_1120.g5049,Sc4wPfr_269.g7752,Sc4wPfr_16.1.g8505	6	Sc4wPfr_126.2.g29265,Sc4wPfr_126.2.g29266,Sc4wPfr_85.1.g31222,Sc4wPfr_383.g33503,Sc4wPfr_1120.g5049,Sc4wPfr_269.g7752	0.0006224	0.964724	15061	5	18	15123	3273.5	11849.5	99.59	14.051	0.0764777
GO:0038092	nodal signaling pathway	8	Sc4wPfr_1844.g14252,Sc4wPfr_137.g27950,Sc4wPfr_137.g27953,Sc4wPfr_1495.g2867,Sc4wPfr_363.3.g30507,Sc4wPfr_1495.1.g33048,Sc4wPfr_1007.g33059,Sc4wPfr_246.g4304	8	Sc4wPfr_1844.g14252,Sc4wPfr_137.g27950,Sc4wPfr_137.g27953,Sc4wPfr_1495.g2867,Sc4wPfr_363.3.g30507,Sc4wPfr_1495.1.g33048,Sc4wPfr_1007.g33059,Sc4wPfr_246.g4304	0	0	10330	4	15	10377	2314.67	8062.33	99.5471	11.6073	0.076253
GO:0071439	clathrin complex	10	Sc4wPfr_575.g14671,Sc4wPfr_575.g14672,Sc4wPfr_575.g14672,Sc4wPfr_365.g14977,Sc4wPfr_1062.g19617,Sc4wPfr_1062.g19618,Sc4wPfr_749.1.g22010,Sc4wPfr_749.1.g22015,Sc4wPfr_506.2.g28744,Sc4wPfr_506.2.g28745	9	Sc4wPfr_575.g14671,Sc4wPfr_575.g14672,Sc4wPfr_365.g14977,Sc4wPfr_1062.g19617,Sc4wPfr_1062.g19618,Sc4wPfr_749.1.g22010,Sc4wPfr_749.1.g22015,Sc4wPfr_506.2.g28744,Sc4wPfr_506.2.g28745	2.6287e-05	0.0563331	13249	7	25	13362	2865.83	10496.2	99.1543	19.5492	0.0760385
GO:0000920	septum digestion after cytokinesis	22	Sc4wPfr_1114.g10933,Sc4wPfr_73.g11563,Sc4wPfr_365.g14957,Sc4wPfr_1091.g16437,Sc4wPfr_776.g16570,Sc4wPfr_776.g16571,Sc4wPfr_181.g16651,Sc4wPfr_134.g20082,Sc4wPfr_2673.g20324,Sc4wPfr_2673.g20325,Sc4wPfr_181.2.g21310,Sc4wPfr_977.1.g21529,Sc4wPfr_977.g21613,Sc4wPfr_547.1.g24950,Sc4wPfr_547.1.g24951,Sc4wPfr_547.1.g24951,Sc4wPfr_638.g29690,Sc4wPfr_463.g30863,Sc4wPfr_381.1.g32143,Sc4wPfr_16.1.g8473,Sc4w…	16	Sc4wPfr_1114.g10933,Sc4wPfr_73.g11563,Sc4wPfr_365.g14957,Sc4wPfr_1091.g16437,Sc4wPfr_181.g16651,Sc4wPfr_134.g20082,Sc4wPfr_977.1.g21529,Sc4wPfr_977.g21613,Sc4wPfr_547.1.g24950,Sc4wPfr_547.1.g24951,Sc4wPfr_638.g29690,Sc4wPfr_463.g30863,Sc4wPfr_381.1.g32143,Sc4wPfr_16.1.g8473,Sc4wPfr_16.1.g8493,Sc4wPfr_703.g8947	5.8941e-05	0.117823	21237	8	28	21815	4563.33	17090.7	97.3504	21.9928	0.075999
GO:0005890	sodium:potassium-exchanging ATPase complex	16	Sc4wPfr_1468.g12853,Sc4wPfr_292.g13103,Sc4wPfr_292.g13104,Sc4wPfr_4146.g26958,Sc4wPfr_4146.g26959,Sc4wPfr_98.g2686,Sc4wPfr_98.g2687,Sc4wPfr_98.g2688,Sc4wPfr_98.g2697,Sc4wPfr_98.g2699,Sc4wPfr_98.g2700,Sc4wPfr_759.g27583,Sc4wPfr_830.g6317,Sc4wPfr_830.g6318,Sc4wPfr_830.g6319,Sc4wPfr_830.g6320	16	Sc4wPfr_1468.g12853,Sc4wPfr_292.g13103,Sc4wPfr_292.g13104,Sc4wPfr_4146.g26958,Sc4wPfr_4146.g26959,Sc4wPfr_98.g2686,Sc4wPfr_98.g2687,Sc4wPfr_98.g2688,Sc4wPfr_98.g2697,Sc4wPfr_98.g2699,Sc4wPfr_98.g2700,Sc4wPfr_759.g27583,Sc4wPfr_830.g6317,Sc4wPfr_830.g6318,Sc4wPfr_830.g6319,Sc4wPfr_830.g6320	0	0	26138	23	89	26262	6009.67	20252.3	99.5278	68.4222	0.0759834
GO:1990239	steroid hormone binding	16	Sc4wPfr_1468.g12853,Sc4wPfr_292.g13103,Sc4wPfr_292.g13104,Sc4wPfr_4146.g26958,Sc4wPfr_4146.g26959,Sc4wPfr_98.g2686,Sc4wPfr_98.g2687,Sc4wPfr_98.g2688,Sc4wPfr_98.g2697,Sc4wPfr_98.g2699,Sc4wPfr_98.g2700,Sc4wPfr_759.g27583,Sc4wPfr_830.g6317,Sc4wPfr_830.g6318,Sc4wPfr_830.g6319,Sc4wPfr_830.g6320	16	Sc4wPfr_1468.g12853,Sc4wPfr_292.g13103,Sc4wPfr_292.g13104,Sc4wPfr_4146.g26958,Sc4wPfr_4146.g26959,Sc4wPfr_98.g2686,Sc4wPfr_98.g2687,Sc4wPfr_98.g2688,Sc4wPfr_98.g2697,Sc4wPfr_98.g2699,Sc4wPfr_98.g2700,Sc4wPfr_759.g27583,Sc4wPfr_830.g6317,Sc4wPfr_830.g6318,Sc4wPfr_830.g6319,Sc4wPfr_830.g6320	0	0	26138	23	89	26262	6009.67	20252.3	99.5278	68.4222	0.0759834
GO:0036376	sodium ion export across plasma membrane	16	Sc4wPfr_1468.g12853,Sc4wPfr_292.g13103,Sc4wPfr_292.g13104,Sc4wPfr_4146.g26958,Sc4wPfr_4146.g26959,Sc4wPfr_98.g2686,Sc4wPfr_98.g2687,Sc4wPfr_98.g2688,Sc4wPfr_98.g2697,Sc4wPfr_98.g2699,Sc4wPfr_98.g2700,Sc4wPfr_759.g27583,Sc4wPfr_830.g6317,Sc4wPfr_830.g6318,Sc4wPfr_830.g6319,Sc4wPfr_830.g6320	16	Sc4wPfr_1468.g12853,Sc4wPfr_292.g13103,Sc4wPfr_292.g13104,Sc4wPfr_4146.g26958,Sc4wPfr_4146.g26959,Sc4wPfr_98.g2686,Sc4wPfr_98.g2687,Sc4wPfr_98.g2688,Sc4wPfr_98.g2697,Sc4wPfr_98.g2699,Sc4wPfr_98.g2700,Sc4wPfr_759.g27583,Sc4wPfr_830.g6317,Sc4wPfr_830.g6318,Sc4wPfr_830.g6319,Sc4wPfr_830.g6320	0	0	26138	23	89	26262	6009.67	20252.3	99.5278	68.4222	0.0759834
GO:1903416	response to glycoside	16	Sc4wPfr_1468.g12853,Sc4wPfr_292.g13103,Sc4wPfr_292.g13104,Sc4wPfr_4146.g26958,Sc4wPfr_4146.g26959,Sc4wPfr_98.g2686,Sc4wPfr_98.g2687,Sc4wPfr_98.g2688,Sc4wPfr_98.g2697,Sc4wPfr_98.g2699,Sc4wPfr_98.g2700,Sc4wPfr_759.g27583,Sc4wPfr_830.g6317,Sc4wPfr_830.g6318,Sc4wPfr_830.g6319,Sc4wPfr_830.g6320	16	Sc4wPfr_1468.g12853,Sc4wPfr_292.g13103,Sc4wPfr_292.g13104,Sc4wPfr_4146.g26958,Sc4wPfr_4146.g26959,Sc4wPfr_98.g2686,Sc4wPfr_98.g2687,Sc4wPfr_98.g2688,Sc4wPfr_98.g2697,Sc4wPfr_98.g2699,Sc4wPfr_98.g2700,Sc4wPfr_759.g27583,Sc4wPfr_830.g6317,Sc4wPfr_830.g6318,Sc4wPfr_830.g6319,Sc4wPfr_830.g6320	0	0	26138	23	89	26262	6009.67	20252.3	99.5278	68.4222	0.0759834
GO:1990573	potassium ion import across plasma membrane	16	Sc4wPfr_1468.g12853,Sc4wPfr_292.g13103,Sc4wPfr_292.g13104,Sc4wPfr_4146.g26958,Sc4wPfr_4146.g26959,Sc4wPfr_98.g2686,Sc4wPfr_98.g2687,Sc4wPfr_98.g2688,Sc4wPfr_98.g2697,Sc4wPfr_98.g2699,Sc4wPfr_98.g2700,Sc4wPfr_759.g27583,Sc4wPfr_830.g6317,Sc4wPfr_830.g6318,Sc4wPfr_830.g6319,Sc4wPfr_830.g6320	16	Sc4wPfr_1468.g12853,Sc4wPfr_292.g13103,Sc4wPfr_292.g13104,Sc4wPfr_4146.g26958,Sc4wPfr_4146.g26959,Sc4wPfr_98.g2686,Sc4wPfr_98.g2687,Sc4wPfr_98.g2688,Sc4wPfr_98.g2697,Sc4wPfr_98.g2699,Sc4wPfr_98.g2700,Sc4wPfr_759.g27583,Sc4wPfr_830.g6317,Sc4wPfr_830.g6318,Sc4wPfr_830.g6319,Sc4wPfr_830.g6320	0	0	26138	23	89	26262	6009.67	20252.3	99.5278	68.4222	0.0759834
GO:0006379	mRNA cleavage	9	Sc4wPfr_1402.g13900,Sc4wPfr_1402.g13903,Sc4wPfr_74.g18515,Sc4wPfr_74.g18515,Sc4wPfr_650.g23000,Sc4wPfr_106.g23612,Sc4wPfr_290.1.g3138,Sc4wPfr_492.2.g528,Sc4wPfr_229.g6944	8	Sc4wPfr_1402.g13900,Sc4wPfr_1402.g13903,Sc4wPfr_74.g18515,Sc4wPfr_650.g23000,Sc4wPfr_106.g23612,Sc4wPfr_290.1.g3138,Sc4wPfr_492.2.g528,Sc4wPfr_229.g6944	7.5488e-05	0.147546	10160	6	22	10257	2231.17	7971.83	99.0543	17.1055	0.0758664
GO:2001244	positive regulation of intrinsic apoptotic signaling pathway	18	Sc4wPfr_90.g1147,Sc4wPfr_146.g12030,Sc4wPfr_32.g14507,Sc4wPfr_32.g14508,Sc4wPfr_475.1.g23416,Sc4wPfr_385.g24424,Sc4wPfr_1163.g25167,Sc4wPfr_2047.g25320,Sc4wPfr_2047.g25320,Sc4wPfr_264.g27432,Sc4wPfr_263.1.g30945,Sc4wPfr_200.g3528,Sc4wPfr_109.1.g7300,Sc4wPfr_92.g7726,Sc4wPfr_92.g7727,Sc4wPfr_269.g7775,Sc4wPfr_431.2.g8709,Sc4wPfr_642.g9129	15	Sc4wPfr_146.g12030,Sc4wPfr_32.g14507,Sc4wPfr_475.1.g23416,Sc4wPfr_385.g24424,Sc4wPfr_1163.g25167,Sc4wPfr_2047.g25320,Sc4wPfr_264.g27432,Sc4wPfr_263.1.g30945,Sc4wPfr_200.g3528,Sc4wPfr_109.1.g7300,Sc4wPfr_92.g7726,Sc4wPfr_92.g7727,Sc4wPfr_269.g7775,Sc4wPfr_431.2.g8709,Sc4wPfr_642.g9129	3.2412e-06	0.00778215	17481	7	26	17646	3830	13552	99.0649	20.1601	0.0757699
GO:0032902	nerve growth factor production	11	Sc4wPfr_634.1.g17844,Sc4wPfr_634.1.g17845,Sc4wPfr_424.1.g2106,Sc4wPfr_424.1.g2106,Sc4wPfr_384.g24903,Sc4wPfr_338.g25884,Sc4wPfr_44.g26901,Sc4wPfr_48.g30209,Sc4wPfr_48.g30211,Sc4wPfr_826.g32481,Sc4wPfr_62.g4435	9	Sc4wPfr_634.1.g17844,Sc4wPfr_634.1.g17845,Sc4wPfr_424.1.g2106,Sc4wPfr_384.g24903,Sc4wPfr_338.g25884,Sc4wPfr_44.g26901,Sc4wPfr_48.g30209,Sc4wPfr_48.g30211,Sc4wPfr_62.g4435	0.00019762	0.349793	21730	9	33	21873	4767.33	17105.7	99.3462	25.6583	0.0756841
GO:0055119	relaxation of cardiac muscle	26	Sc4wPfr_1468.g12853,Sc4wPfr_292.g13103,Sc4wPfr_292.g13104,Sc4wPfr_1483.g15774,Sc4wPfr_523.g16322,Sc4wPfr_416.g17198,Sc4wPfr_416.g17198,Sc4wPfr_416.g17198,Sc4wPfr_106.g23543,Sc4wPfr_4146.g26958,Sc4wPfr_4146.g26959,Sc4wPfr_98.g2686,Sc4wPfr_98.g2687,Sc4wPfr_98.g2688,Sc4wPfr_98.g2697,Sc4wPfr_98.g2699,Sc4wPfr_98.g2700,Sc4wPfr_759.g27583,Sc4wPfr_156.1.g4068,Sc4wPfr_156.1.g4073,Sc4wPfr_308.g5501,Sc4wPfr…	24	Sc4wPfr_1468.g12853,Sc4wPfr_292.g13103,Sc4wPfr_292.g13104,Sc4wPfr_1483.g15774,Sc4wPfr_523.g16322,Sc4wPfr_416.g17198,Sc4wPfr_106.g23543,Sc4wPfr_4146.g26958,Sc4wPfr_4146.g26959,Sc4wPfr_98.g2686,Sc4wPfr_98.g2687,Sc4wPfr_98.g2688,Sc4wPfr_98.g2697,Sc4wPfr_98.g2699,Sc4wPfr_98.g2700,Sc4wPfr_759.g27583,Sc4wPfr_156.1.g4068,Sc4wPfr_156.1.g4073,Sc4wPfr_308.g5501,Sc4wPfr_830.g6317,Sc4wPfr_830.g6318,Sc4wPfr_8…	6.0665e-11	1.8369e-07	34654	25	97	34873	7944.67	26909.3	99.372	74.5313	0.0755181
GO:0034450	ubiquitin-ubiquitin ligase activity	14	Sc4wPfr_272.g11371,Sc4wPfr_272.g11372,Sc4wPfr_328.2.g12074,Sc4wPfr_396.1.g13847,Sc4wPfr_104.g15001,Sc4wPfr_104.g15002,Sc4wPfr_1096.g19441,Sc4wPfr_208.3.g23096,Sc4wPfr_622.g24242,Sc4wPfr_622.g24242,Sc4wPfr_353.g28174,Sc4wPfr_886.g29510,Sc4wPfr_886.g29516,Sc4wPfr_582.g7475	11	Sc4wPfr_272.g11372,Sc4wPfr_328.2.g12074,Sc4wPfr_396.1.g13847,Sc4wPfr_104.g15001,Sc4wPfr_104.g15002,Sc4wPfr_1096.g19441,Sc4wPfr_208.3.g23096,Sc4wPfr_622.g24242,Sc4wPfr_353.g28174,Sc4wPfr_886.g29510,Sc4wPfr_582.g7475	0.00013374	0.246748	17649	8	30	18228	4026.83	14201.2	96.8236	23.2147	0.0752672
GO:0000354	cis assembly of pre-catalytic spliceosome	3	Sc4wPfr_283.g24314,Sc4wPfr_812.g31151,Sc4wPfr_356.g7101	3	Sc4wPfr_283.g24314,Sc4wPfr_812.g31151,Sc4wPfr_356.g7101	0	0	13286	5	19	13368	2975.67	10392.3	99.3866	14.6619	0.0750536
GO:0001824	blastocyst development	8	Sc4wPfr_483.g14168,Sc4wPfr_523.g16369,Sc4wPfr_275.3.g1981,Sc4wPfr_275.3.g1981,Sc4wPfr_475.1.g23411,Sc4wPfr_106.g23595,Sc4wPfr_194.g32440,Sc4wPfr_156.1.g4093	6	Sc4wPfr_483.g14168,Sc4wPfr_523.g16369,Sc4wPfr_475.1.g23411,Sc4wPfr_106.g23595,Sc4wPfr_194.g32440,Sc4wPfr_156.1.g4093	0.00346188	1	11155	6	23	11241	2472	8583	99.2349	17.7165	0.0747012
GO:0030911	TPR domain binding	10	Sc4wPfr_250.g16028,Sc4wPfr_250.g16040,Sc4wPfr_439.g20897,Sc4wPfr_268.g25761,Sc4wPfr_289.g2548,Sc4wPfr_886.g29510,Sc4wPfr_886.g29516,Sc4wPfr_594.g3248,Sc4wPfr_289.1.g8521,Sc4wPfr_289.1.g8528	9	Sc4wPfr_250.g16028,Sc4wPfr_250.g16040,Sc4wPfr_439.g20897,Sc4wPfr_268.g25761,Sc4wPfr_289.g2548,Sc4wPfr_886.g29510,Sc4wPfr_594.g3248,Sc4wPfr_289.1.g8521,Sc4wPfr_289.1.g8528	2.6287e-05	0.0563331	11267	19	68	11394	2436.33	8957.67	98.8854	53.1494	0.0746779
GO:0035509	negative regulation of myosin-light-chain-phosphatase activity	5	Sc4wPfr_855.g14411,Sc4wPfr_155.g16875,Sc4wPfr_155.g16876,Sc4wPfr_850.1.g5723,Sc4wPfr_850.1.g5726	4	Sc4wPfr_155.g16875,Sc4wPfr_155.g16876,Sc4wPfr_850.1.g5723,Sc4wPfr_850.1.g5726	0.00513064	1	11177	9	31	11283	2322.17	8960.83	99.0605	24.4365	0.0746144
GO:0044085	cellular component biogenesis	8	Sc4wPfr_292.g13064,Sc4wPfr_133.g14106,Sc4wPfr_825.g15296,Sc4wPfr_945.g15378,Sc4wPfr_588.g23897,Sc4wPfr_1152.g30276,Sc4wPfr_246.g4312,Sc4wPfr_458.g6395	8	Sc4wPfr_292.g13064,Sc4wPfr_133.g14106,Sc4wPfr_825.g15296,Sc4wPfr_945.g15378,Sc4wPfr_588.g23897,Sc4wPfr_1152.g30276,Sc4wPfr_246.g4312,Sc4wPfr_458.g6395	0	0	11526	5	18	11715	2488.67	9226.33	98.3867	14.051	0.0745915
GO:0035925	mRNA 3'-UTR AU-rich region binding	12	Sc4wPfr_3950.g16251,Sc4wPfr_602.g18711,Sc4wPfr_332.g19470,Sc4wPfr_270.1.g19653,Sc4wPfr_39.g20538,Sc4wPfr_39.g20538,Sc4wPfr_39.g20540,Sc4wPfr_255.g21686,Sc4wPfr_162.g21720,Sc4wPfr_599.g27236,Sc4wPfr_259.g33661,Sc4wPfr_38.g5828	11	Sc4wPfr_3950.g16251,Sc4wPfr_602.g18711,Sc4wPfr_332.g19470,Sc4wPfr_270.1.g19653,Sc4wPfr_39.g20538,Sc4wPfr_39.g20540,Sc4wPfr_255.g21686,Sc4wPfr_162.g21720,Sc4wPfr_599.g27236,Sc4wPfr_259.g33661,Sc4wPfr_38.g5828	3.1871e-06	0.00772563	17431	8	31	17508	3932	13576	99.5602	23.8256	0.0743786
GO:0060021	roof of mouth development	24	Sc4wPfr_73.g11593,Sc4wPfr_8.g18245,Sc4wPfr_275.3.g1992,Sc4wPfr_107.1.g20637,Sc4wPfr_740.1.g22471,Sc4wPfr_350.g2263,Sc4wPfr_68.g2320,Sc4wPfr_804.g24094,Sc4wPfr_293.g24401,Sc4wPfr_319.g27364,Sc4wPfr_137.g27953,Sc4wPfr_372.g27997,Sc4wPfr_399.g28064,Sc4wPfr_287.2.g28262,Sc4wPfr_1495.g2867,Sc4wPfr_363.3.g30478,Sc4wPfr_363.3.g30507,Sc4wPfr_1357.1.g3228,Sc4wPfr_1514.g5393,Sc4wPfr_1514.g5394,Sc4wPfr_878.…	20	Sc4wPfr_73.g11593,Sc4wPfr_8.g18245,Sc4wPfr_275.3.g1992,Sc4wPfr_107.1.g20637,Sc4wPfr_740.1.g22471,Sc4wPfr_350.g2263,Sc4wPfr_319.g27364,Sc4wPfr_137.g27953,Sc4wPfr_372.g27997,Sc4wPfr_399.g28064,Sc4wPfr_287.2.g28262,Sc4wPfr_1495.g2867,Sc4wPfr_363.3.g30478,Sc4wPfr_363.3.g30507,Sc4wPfr_1514.g5393,Sc4wPfr_1514.g5394,Sc4wPfr_878.g6530,Sc4wPfr_440.g6790,Sc4wPfr_330.g6880,Sc4wPfr_719.g8343	1.4439e-07	0.00038652	32655	15	56	32817	7122.5	25694.5	99.5064	43.3748	0.0738887
GO:0031432	titin binding	14	Sc4wPfr_1060.g12125,Sc4wPfr_44.1.g12999,Sc4wPfr_618.g14865,Sc4wPfr_250.g16019,Sc4wPfr_87.g16526,Sc4wPfr_416.g17198,Sc4wPfr_416.g17198,Sc4wPfr_416.g17198,Sc4wPfr_71.g23041,Sc4wPfr_71.g23047,Sc4wPfr_71.g23047,Sc4wPfr_227.g25821,Sc4wPfr_627.g26950,Sc4wPfr_199.g28682	8	Sc4wPfr_44.1.g12999,Sc4wPfr_618.g14865,Sc4wPfr_250.g16019,Sc4wPfr_416.g17198,Sc4wPfr_71.g23047,Sc4wPfr_227.g25821,Sc4wPfr_627.g26950,Sc4wPfr_199.g28682	0.0235772	1	14284	7	26	14440	3115.83	11305.2	98.9197	20.1601	0.07382
GO:0005682	U5 snRNP	15	Sc4wPfr_2494.g10705,Sc4wPfr_90.g1180,Sc4wPfr_59.2.g12425,Sc4wPfr_59.2.g12426,Sc4wPfr_181.g16620,Sc4wPfr_568.g22805,Sc4wPfr_622.g24245,Sc4wPfr_283.g24314,Sc4wPfr_283.g24317,Sc4wPfr_405.g27544,Sc4wPfr_82.1.g28968,Sc4wPfr_812.g31151,Sc4wPfr_381.1.g32188,Sc4wPfr_941.g5939,Sc4wPfr_356.g7101	13	Sc4wPfr_2494.g10705,Sc4wPfr_59.2.g12425,Sc4wPfr_181.g16620,Sc4wPfr_568.g22805,Sc4wPfr_622.g24245,Sc4wPfr_283.g24314,Sc4wPfr_283.g24317,Sc4wPfr_405.g27544,Sc4wPfr_82.1.g28968,Sc4wPfr_812.g31151,Sc4wPfr_381.1.g32188,Sc4wPfr_941.g5939,Sc4wPfr_356.g7101	3.9121e-06	0.00928339	26719	9	35	26904	6017.17	20886.8	99.3124	26.8801	0.0738124
GO:2000210	positive regulation of anoikis	9	Sc4wPfr_1909.g11472,Sc4wPfr_96.g11950,Sc4wPfr_96.g11950,Sc4wPfr_776.g16569,Sc4wPfr_347.g19275,Sc4wPfr_846.1.g25647,Sc4wPfr_846.1.g25647,Sc4wPfr_1055.g27064,Sc4wPfr_381.1.g32162	7	Sc4wPfr_1909.g11472,Sc4wPfr_96.g11950,Sc4wPfr_776.g16569,Sc4wPfr_347.g19275,Sc4wPfr_846.1.g25647,Sc4wPfr_1055.g27064,Sc4wPfr_381.1.g32162	0.00134697	1	12358	6	23	12430	2708.67	9552.33	99.4208	17.7165	0.0735836
GO:0021846	cell proliferation in forebrain	11	Sc4wPfr_1080.g15226,Sc4wPfr_1080.g15226,Sc4wPfr_1080.g15230,Sc4wPfr_654.g18227,Sc4wPfr_275.3.g1976,Sc4wPfr_275.3.g1992,Sc4wPfr_68.g2320,Sc4wPfr_804.g24094,Sc4wPfr_226.1.g26815,Sc4wPfr_372.g27997,Sc4wPfr_1357.1.g3228	6	Sc4wPfr_1080.g15226,Sc4wPfr_1080.g15230,Sc4wPfr_654.g18227,Sc4wPfr_275.3.g1992,Sc4wPfr_226.1.g26815,Sc4wPfr_372.g27997	0.0489153	1	12251	7	26	12346	2654.17	9669.83	99.2305	20.1601	0.07345
GO:0060850	regulation of transcription involved in cell fate commitment	14	Sc4wPfr_552.g10518,Sc4wPfr_158.2.g10604,Sc4wPfr_1091.g16442,Sc4wPfr_350.g2265,Sc4wPfr_350.g2265,Sc4wPfr_475.1.g23423,Sc4wPfr_251.g2461,Sc4wPfr_39.1.g26772,Sc4wPfr_39.1.g26772,Sc4wPfr_39.1.g26772,Sc4wPfr_39.1.g26772,Sc4wPfr_39.1.g26772,Sc4wPfr_1514.g5394,Sc4wPfr_719.g8302	9	Sc4wPfr_552.g10518,Sc4wPfr_158.2.g10604,Sc4wPfr_1091.g16442,Sc4wPfr_350.g2265,Sc4wPfr_475.1.g23423,Sc4wPfr_251.g2461,Sc4wPfr_39.1.g26772,Sc4wPfr_1514.g5394,Sc4wPfr_719.g8302	0.00580494	1	24384	6	22	24582	5205.5	19292.5	99.1945	17.1055	0.0733949
GO:0000050	urea cycle	6	Sc4wPfr_945.g15390,Sc4wPfr_363.2.g30341,Sc4wPfr_850.1.g5732,Sc4wPfr_850.1.g5733,Sc4wPfr_850.1.g5734,Sc4wPfr_1044.g6847	6	Sc4wPfr_945.g15390,Sc4wPfr_363.2.g30341,Sc4wPfr_850.1.g5732,Sc4wPfr_850.1.g5733,Sc4wPfr_850.1.g5734,Sc4wPfr_1044.g6847	0	0	10339	2	8	10440	2357.17	8082.83	99.0326	6.10912	0.0727535
GO:0051966	regulation of synaptic transmission, glutamatergic	17	Sc4wPfr_292.g13103,Sc4wPfr_292.g13104,Sc4wPfr_17.g15882,Sc4wPfr_107.1.g20637,Sc4wPfr_384.g24771,Sc4wPfr_4146.g26959,Sc4wPfr_98.g2686,Sc4wPfr_98.g2687,Sc4wPfr_98.g2688,Sc4wPfr_98.g2699,Sc4wPfr_98.g2700,Sc4wPfr_759.g27583,Sc4wPfr_691.g31338,Sc4wPfr_830.g6317,Sc4wPfr_830.g6318,Sc4wPfr_830.g6319,Sc4wPfr_830.g6320	17	Sc4wPfr_292.g13103,Sc4wPfr_292.g13104,Sc4wPfr_17.g15882,Sc4wPfr_107.1.g20637,Sc4wPfr_384.g24771,Sc4wPfr_4146.g26959,Sc4wPfr_98.g2686,Sc4wPfr_98.g2687,Sc4wPfr_98.g2688,Sc4wPfr_98.g2699,Sc4wPfr_98.g2700,Sc4wPfr_759.g27583,Sc4wPfr_691.g31338,Sc4wPfr_830.g6317,Sc4wPfr_830.g6318,Sc4wPfr_830.g6319,Sc4wPfr_830.g6320	0	0	29727	16	65	29898	6751	23147	99.4281	49.4839	0.0713637
GO:0002087	regulation of respiratory gaseous exchange by neurological system process	13	Sc4wPfr_165.g10051,Sc4wPfr_1241.g21489,Sc4wPfr_2124.g26585,Sc4wPfr_98.g2686,Sc4wPfr_98.g2687,Sc4wPfr_98.g2688,Sc4wPfr_98.g2699,Sc4wPfr_98.g2700,Sc4wPfr_759.g27583,Sc4wPfr_830.g6317,Sc4wPfr_830.g6318,Sc4wPfr_830.g6319,Sc4wPfr_830.g6320	12	Sc4wPfr_165.g10051,Sc4wPfr_2124.g26585,Sc4wPfr_98.g2686,Sc4wPfr_98.g2687,Sc4wPfr_98.g2688,Sc4wPfr_98.g2699,Sc4wPfr_98.g2700,Sc4wPfr_759.g27583,Sc4wPfr_830.g6317,Sc4wPfr_830.g6318,Sc4wPfr_830.g6319,Sc4wPfr_830.g6320	1.1097e-06	0.00279638	20768	14	58	20871	4760.67	16110.3	99.5065	43.9857	0.0707886
GO:0035267	NuA4 histone acetyltransferase complex	17	Sc4wPfr_952.1.g9517,Sc4wPfr_952.1.g9518,Sc4wPfr_433.g11155,Sc4wPfr_32.g14536,Sc4wPfr_181.g16609,Sc4wPfr_221.g17485,Sc4wPfr_14.g1835,Sc4wPfr_1061.g18841,Sc4wPfr_347.g19315,Sc4wPfr_899.g22596,Sc4wPfr_161.g25568,Sc4wPfr_886.g29504,Sc4wPfr_488.g29965,Sc4wPfr_363.3.g30473,Sc4wPfr_363.3.g30474,Sc4wPfr_290.1.g3137,Sc4wPfr_390.g5620	14	Sc4wPfr_952.1.g9517,Sc4wPfr_952.1.g9518,Sc4wPfr_32.g14536,Sc4wPfr_181.g16609,Sc4wPfr_221.g17485,Sc4wPfr_1061.g18841,Sc4wPfr_899.g22596,Sc4wPfr_161.g25568,Sc4wPfr_886.g29504,Sc4wPfr_488.g29965,Sc4wPfr_363.3.g30473,Sc4wPfr_363.3.g30474,Sc4wPfr_290.1.g3137,Sc4wPfr_390.g5620	8.3081e-06	0.0191336	32980	16	63	33159	7253.17	25905.8	99.4602	48.2621	0.0707231
GO:0030274	LIM domain binding	6	Sc4wPfr_423.g13423,Sc4wPfr_618.g14865,Sc4wPfr_547.1.g24952,Sc4wPfr_388.g4803,Sc4wPfr_325.1.g5301,Sc4wPfr_11.g7395	5	Sc4wPfr_423.g13423,Sc4wPfr_618.g14865,Sc4wPfr_547.1.g24952,Sc4wPfr_325.1.g5301,Sc4wPfr_11.g7395	0.00178704	1	15400	2	8	15495	3416.33	12078.7	99.3869	6.10912	0.0706074
GO:0031952	regulation of protein autophosphorylation	11	Sc4wPfr_397.g1310,Sc4wPfr_224.g18121,Sc4wPfr_224.g18122,Sc4wPfr_656.g21061,Sc4wPfr_740.1.g22471,Sc4wPfr_677.g23719,Sc4wPfr_176.g26287,Sc4wPfr_176.g26287,Sc4wPfr_1269.g30708,Sc4wPfr_830.g6314,Sc4wPfr_479.1.g8219	8	Sc4wPfr_224.g18121,Sc4wPfr_224.g18122,Sc4wPfr_740.1.g22471,Sc4wPfr_677.g23719,Sc4wPfr_176.g26287,Sc4wPfr_1269.g30708,Sc4wPfr_830.g6314,Sc4wPfr_479.1.g8219	0.00196131	1	11628	4	16	11733	2586.83	9146.17	99.1051	12.2182	0.0704367
GO:0030174	regulation of DNA-dependent DNA replication initiation	12	Sc4wPfr_1153.g15530,Sc4wPfr_1153.g15530,Sc4wPfr_270.1.g19654,Sc4wPfr_270.1.g19655,Sc4wPfr_424.1.g2096,Sc4wPfr_1354.g22276,Sc4wPfr_56.g24485,Sc4wPfr_56.g24488,Sc4wPfr_137.g27913,Sc4wPfr_137.g27917,Sc4wPfr_1214.g29766,Sc4wPfr_628.g32812	11	Sc4wPfr_1153.g15530,Sc4wPfr_270.1.g19654,Sc4wPfr_270.1.g19655,Sc4wPfr_424.1.g2096,Sc4wPfr_1354.g22276,Sc4wPfr_56.g24485,Sc4wPfr_56.g24488,Sc4wPfr_137.g27913,Sc4wPfr_137.g27917,Sc4wPfr_1214.g29766,Sc4wPfr_628.g32812	3.1871e-06	0.00772563	18298	8	33	18417	4131.83	14285.2	99.3539	25.0474	0.0697707
GO:0097435	supramolecular fiber organization	13	Sc4wPfr_78.g10410,Sc4wPfr_309.g10787,Sc4wPfr_1009.2.g21388,Sc4wPfr_1009.2.g21389,Sc4wPfr_796.g23312,Sc4wPfr_796.g23312,Sc4wPfr_106.g23554,Sc4wPfr_622.g24261,Sc4wPfr_36.2.g7200,Sc4wPfr_36.2.g7204,Sc4wPfr_36.2.g7204,Sc4wPfr_289.1.g8521,Sc4wPfr_289.1.g8528	10	Sc4wPfr_78.g10410,Sc4wPfr_309.g10787,Sc4wPfr_1009.2.g21388,Sc4wPfr_1009.2.g21389,Sc4wPfr_796.g23312,Sc4wPfr_622.g24261,Sc4wPfr_36.2.g7200,Sc4wPfr_36.2.g7204,Sc4wPfr_289.1.g8521,Sc4wPfr_289.1.g8528	0.00033144	0.552186	15098	15	59	15543	3365.33	12177.7	97.137	45.2075	0.0694919
GO:0070410	co-SMAD binding	9	Sc4wPfr_1844.g14252,Sc4wPfr_854.g18489,Sc4wPfr_854.g18489,Sc4wPfr_854.g18490,Sc4wPfr_439.g20911,Sc4wPfr_137.g27950,Sc4wPfr_137.g27953,Sc4wPfr_363.3.g30507,Sc4wPfr_1020.1.g6621	8	Sc4wPfr_1844.g14252,Sc4wPfr_854.g18489,Sc4wPfr_854.g18490,Sc4wPfr_439.g20911,Sc4wPfr_137.g27950,Sc4wPfr_137.g27953,Sc4wPfr_363.3.g30507,Sc4wPfr_1020.1.g6621	7.5488e-05	0.147546	15791	3	12	15885	3452.17	12432.8	99.4082	9.16369	0.0692665
GO:0031594	neuromuscular junction	18	Sc4wPfr_304.2.g12724,Sc4wPfr_244.2.g15108,Sc4wPfr_17.g15882,Sc4wPfr_416.g17198,Sc4wPfr_26.g17298,Sc4wPfr_224.g18122,Sc4wPfr_1009.2.g21390,Sc4wPfr_740.1.g22471,Sc4wPfr_804.g24119,Sc4wPfr_804.g24119,Sc4wPfr_384.g24771,Sc4wPfr_488.g29956,Sc4wPfr_363.2.g30343,Sc4wPfr_363.2.g30366,Sc4wPfr_1630.g30615,Sc4wPfr_156.1.g4073,Sc4wPfr_1044.g6813,Sc4wPfr_1373.g9101	17	Sc4wPfr_304.2.g12724,Sc4wPfr_244.2.g15108,Sc4wPfr_17.g15882,Sc4wPfr_416.g17198,Sc4wPfr_26.g17298,Sc4wPfr_224.g18122,Sc4wPfr_1009.2.g21390,Sc4wPfr_740.1.g22471,Sc4wPfr_804.g24119,Sc4wPfr_384.g24771,Sc4wPfr_488.g29956,Sc4wPfr_363.2.g30343,Sc4wPfr_363.2.g30366,Sc4wPfr_1630.g30615,Sc4wPfr_156.1.g4073,Sc4wPfr_1044.g6813,Sc4wPfr_1373.g9101	5.6729e-09	1.6276e-05	27078	8	32	27490	5955.17	21515.8	98.5013	24.4365	0.0689641
GO:0008194	UDP-glycosyltransferase activity	12	Sc4wPfr_297.g13141,Sc4wPfr_453.g14885,Sc4wPfr_26.g17235,Sc4wPfr_412.g24346,Sc4wPfr_412.g24346,Sc4wPfr_405.g27541,Sc4wPfr_405.g27541,Sc4wPfr_405.g27541,Sc4wPfr_353.g28151,Sc4wPfr_287.2.g28245,Sc4wPfr_1040.g7638,Sc4wPfr_16.1.g8464	4	Sc4wPfr_453.g14885,Sc4wPfr_412.g24346,Sc4wPfr_353.g28151,Sc4wPfr_287.2.g28245	0.411999	1	11085	5	20	11178	2408.17	8715.83	99.168	15.2728	0.0687176
GO:0007016	cytoskeletal anchoring at plasma membrane	10	Sc4wPfr_32.g14567,Sc4wPfr_588.g23885,Sc4wPfr_391.g24716,Sc4wPfr_447.g29018,Sc4wPfr_65.g31667,Sc4wPfr_975.g7262,Sc4wPfr_11.g7394,Sc4wPfr_11.g7395,Sc4wPfr_582.g7491,Sc4wPfr_582.g7494	8	Sc4wPfr_588.g23885,Sc4wPfr_391.g24716,Sc4wPfr_65.g31667,Sc4wPfr_975.g7262,Sc4wPfr_11.g7394,Sc4wPfr_11.g7395,Sc4wPfr_582.g7491,Sc4wPfr_582.g7494	0.00051829	0.832378	11203	4	16	11292	2427.33	8864.67	99.2118	12.2182	0.0681745
GO:0030619	U1 snRNA binding	4	Sc4wPfr_1463.g9577,Sc4wPfr_2494.g10705,Sc4wPfr_133.g14100,Sc4wPfr_50.g22241	4	Sc4wPfr_1463.g9577,Sc4wPfr_2494.g10705,Sc4wPfr_133.g14100,Sc4wPfr_50.g22241	0	0	10290	5	21	10344	2308.17	8035.83	99.478	15.8837	0.0680017
GO:0007339	binding of sperm to zona pellucida	16	Sc4wPfr_351.g11222,Sc4wPfr_351.g11222,Sc4wPfr_328.2.g12085,Sc4wPfr_489.2.g16713,Sc4wPfr_424.1.g2141,Sc4wPfr_1107.1.g29928,Sc4wPfr_364.g29946,Sc4wPfr_48.g30209,Sc4wPfr_381.1.g32291,Sc4wPfr_660.g32751,Sc4wPfr_1788.g33573,Sc4wPfr_324.1.g5453,Sc4wPfr_324.1.g5454,Sc4wPfr_1044.g6841,Sc4wPfr_356.g7013,Sc4wPfr_1386.g7462	15	Sc4wPfr_351.g11222,Sc4wPfr_328.2.g12085,Sc4wPfr_489.2.g16713,Sc4wPfr_424.1.g2141,Sc4wPfr_1107.1.g29928,Sc4wPfr_364.g29946,Sc4wPfr_48.g30209,Sc4wPfr_381.1.g32291,Sc4wPfr_660.g32751,Sc4wPfr_1788.g33573,Sc4wPfr_324.1.g5453,Sc4wPfr_324.1.g5454,Sc4wPfr_1044.g6841,Sc4wPfr_356.g7013,Sc4wPfr_1386.g7462	4.682e-08	0.00012918	17035	60	247	17187	3874.67	13294.3	99.1156	187.55	0.0679495
GO:0015991	ATP hydrolysis coupled proton transport	23	Sc4wPfr_1015.g12699,Sc4wPfr_292.g13103,Sc4wPfr_292.g13104,Sc4wPfr_297.g13142,Sc4wPfr_635.g14731,Sc4wPfr_144.2.g1680,Sc4wPfr_270.1.g19691,Sc4wPfr_4146.g26959,Sc4wPfr_98.g2686,Sc4wPfr_98.g2687,Sc4wPfr_98.g2688,Sc4wPfr_98.g2697,Sc4wPfr_98.g2699,Sc4wPfr_98.g2700,Sc4wPfr_759.g27583,Sc4wPfr_248.g29618,Sc4wPfr_3.2.g30998,Sc4wPfr_826.g32469,Sc4wPfr_390.g5619,Sc4wPfr_830.g6317,Sc4wPfr_830.g6318,Sc4wPfr_83…	23	Sc4wPfr_1015.g12699,Sc4wPfr_292.g13103,Sc4wPfr_292.g13104,Sc4wPfr_297.g13142,Sc4wPfr_635.g14731,Sc4wPfr_144.2.g1680,Sc4wPfr_270.1.g19691,Sc4wPfr_4146.g26959,Sc4wPfr_98.g2686,Sc4wPfr_98.g2687,Sc4wPfr_98.g2688,Sc4wPfr_98.g2697,Sc4wPfr_98.g2699,Sc4wPfr_98.g2700,Sc4wPfr_759.g27583,Sc4wPfr_248.g29618,Sc4wPfr_3.2.g30998,Sc4wPfr_826.g32469,Sc4wPfr_390.g5619,Sc4wPfr_830.g6317,Sc4wPfr_830.g6318,Sc4wPfr_83…	0	0	34810	19	84	35046	8127	26919	99.3266	62.924	0.0678485
GO:0016013	syntrophin complex	7	Sc4wPfr_102.g11059,Sc4wPfr_14.g1882,Sc4wPfr_24.g32561,Sc4wPfr_240.g3640,Sc4wPfr_240.g3641,Sc4wPfr_240.g3641,Sc4wPfr_240.g3641	4	Sc4wPfr_102.g11059,Sc4wPfr_14.g1882,Sc4wPfr_24.g32561,Sc4wPfr_240.g3641	0.0545331	1	14658	2	8	14736	2924.17	11043.8	99.4707	6.10912	0.0660817
GO:0033160	positive regulation of protein import into nucleus, translocation	7	Sc4wPfr_328.2.g12074,Sc4wPfr_622.g24242,Sc4wPfr_622.g24242,Sc4wPfr_36.2.g7202,Sc4wPfr_289.1.g8521,Sc4wPfr_289.1.g8528,Sc4wPfr_85.g877	6	Sc4wPfr_328.2.g12074,Sc4wPfr_622.g24242,Sc4wPfr_36.2.g7202,Sc4wPfr_289.1.g8521,Sc4wPfr_289.1.g8528,Sc4wPfr_85.g877	0.0006224	0.964724	14674	13	56	15108	3363.33	11744.7	97.1273	42.153	0.0657869
GO:0045197	establishment or maintenance of epithelial cell apical/basal polarity	17	Sc4wPfr_165.g10084,Sc4wPfr_165.g10084,Sc4wPfr_165.g10084,Sc4wPfr_165.g10084,Sc4wPfr_96.g11950,Sc4wPfr_59.2.g12535,Sc4wPfr_1402.g13907,Sc4wPfr_776.g16569,Sc4wPfr_347.g19275,Sc4wPfr_187.g1957,Sc4wPfr_789.g22447,Sc4wPfr_947.g29654,Sc4wPfr_1788.g33563,Sc4wPfr_1788.g33564,Sc4wPfr_1788.g33565,Sc4wPfr_1788.g33566,Sc4wPfr_975.g7260	11	Sc4wPfr_165.g10084,Sc4wPfr_96.g11950,Sc4wPfr_59.2.g12535,Sc4wPfr_1402.g13907,Sc4wPfr_776.g16569,Sc4wPfr_347.g19275,Sc4wPfr_789.g22447,Sc4wPfr_947.g29654,Sc4wPfr_1788.g33563,Sc4wPfr_1788.g33564,Sc4wPfr_1788.g33566	0.00287817	1	21012	9	38	21305	4516.17	16282.8	98.6247	28.7129	0.0653448
GO:0000083	regulation of transcription involved in G1/S transition of mitotic cell cycle	28	Sc4wPfr_952.1.g9519,Sc4wPfr_446.g12591,Sc4wPfr_483.g14185,Sc4wPfr_32.g14526,Sc4wPfr_32.g14529,Sc4wPfr_32.g14529,Sc4wPfr_635.g14703,Sc4wPfr_326.g15655,Sc4wPfr_26.g17310,Sc4wPfr_455.g20416,Sc4wPfr_251.g2419,Sc4wPfr_118.g25081,Sc4wPfr_759.g27644,Sc4wPfr_199.g28654,Sc4wPfr_199.g28659,Sc4wPfr_1107.1.g29891,Sc4wPfr_1107.1.g29891,Sc4wPfr_263.1.g30955,Sc4wPfr_3.2.g31018,Sc4wPfr_85.1.g31222,Sc4wPfr_383.g3…	22	Sc4wPfr_446.g12591,Sc4wPfr_483.g14185,Sc4wPfr_32.g14526,Sc4wPfr_32.g14529,Sc4wPfr_635.g14703,Sc4wPfr_326.g15655,Sc4wPfr_455.g20416,Sc4wPfr_251.g2419,Sc4wPfr_118.g25081,Sc4wPfr_759.g27644,Sc4wPfr_199.g28654,Sc4wPfr_199.g28659,Sc4wPfr_1107.1.g29891,Sc4wPfr_263.1.g30955,Sc4wPfr_3.2.g31018,Sc4wPfr_85.1.g31222,Sc4wPfr_383.g33550,Sc4wPfr_629.g5415,Sc4wPfr_589.g6036,Sc4wPfr_36.2.g7202,Sc4wPfr_975.g7279,…	3.761e-07	0.00098274	23339	8	34	23565	5055.5	18377.5	99.041	25.6583	0.0644555
GO:0030241	skeletal muscle myosin thick filament assembly	5	Sc4wPfr_309.g10790,Sc4wPfr_304.2.g12724,Sc4wPfr_304.2.g12725,Sc4wPfr_1556.g21993,Sc4wPfr_624.g29791	4	Sc4wPfr_304.2.g12724,Sc4wPfr_304.2.g12725,Sc4wPfr_1556.g21993,Sc4wPfr_624.g29791	0.00513064	1	11774	3	12	11832	2428.83	9403.17	99.5098	9.16369	0.0643756
GO:0048739	cardiac muscle fiber development	5	Sc4wPfr_309.g10790,Sc4wPfr_304.2.g12724,Sc4wPfr_304.2.g12725,Sc4wPfr_1556.g21993,Sc4wPfr_624.g29791	4	Sc4wPfr_304.2.g12724,Sc4wPfr_304.2.g12725,Sc4wPfr_1556.g21993,Sc4wPfr_624.g29791	0.00513064	1	11774	3	12	11832	2428.83	9403.17	99.5098	9.16369	0.0643756
GO:0001881	receptor recycling	6	Sc4wPfr_104.g15010,Sc4wPfr_320.1.g20946,Sc4wPfr_699.g21675,Sc4wPfr_2515.g28086,Sc4wPfr_22.2.g32891,Sc4wPfr_920.g414	6	Sc4wPfr_104.g15010,Sc4wPfr_320.1.g20946,Sc4wPfr_699.g21675,Sc4wPfr_2515.g28086,Sc4wPfr_22.2.g32891,Sc4wPfr_920.g414	0	0	12446	4	17	12606	2707.33	9898.67	98.7308	12.8292	0.0641016
GO:0021545	cranial nerve development	7	Sc4wPfr_208.1.g13278,Sc4wPfr_350.g2263,Sc4wPfr_739.g28800,Sc4wPfr_29.g30023,Sc4wPfr_29.g30024,Sc4wPfr_1514.g5393,Sc4wPfr_1514.g5394	5	Sc4wPfr_208.1.g13278,Sc4wPfr_350.g2263,Sc4wPfr_29.g30023,Sc4wPfr_1514.g5393,Sc4wPfr_1514.g5394	0.00877484	1	13892	5	21	14199	3005.83	11193.2	97.8379	15.8837	0.0636592
GO:0007269	neurotransmitter secretion	34	Sc4wPfr_165.g10045,Sc4wPfr_309.g10774,Sc4wPfr_73.g11515,Sc4wPfr_73.g11516,Sc4wPfr_828.1.g12783,Sc4wPfr_635.g14720,Sc4wPfr_352.g15749,Sc4wPfr_352.g15758,Sc4wPfr_17.g15825,Sc4wPfr_10.g18882,Sc4wPfr_95.2.g19512,Sc4wPfr_422.g20156,Sc4wPfr_162.g21727,Sc4wPfr_252.g22297,Sc4wPfr_2321.1.g24414,Sc4wPfr_370.g26385,Sc4wPfr_967.g28083,Sc4wPfr_79.1.g29203,Sc4wPfr_624.g29781,Sc4wPfr_1107.1.g29875,Sc4wPfr_364.g…	25	Sc4wPfr_165.g10045,Sc4wPfr_309.g10774,Sc4wPfr_73.g11515,Sc4wPfr_828.1.g12783,Sc4wPfr_635.g14720,Sc4wPfr_352.g15749,Sc4wPfr_17.g15825,Sc4wPfr_10.g18882,Sc4wPfr_162.g21727,Sc4wPfr_252.g22297,Sc4wPfr_2321.1.g24414,Sc4wPfr_370.g26385,Sc4wPfr_967.g28083,Sc4wPfr_79.1.g29203,Sc4wPfr_624.g29781,Sc4wPfr_364.g29946,Sc4wPfr_1660.g31973,Sc4wPfr_1660.g31974,Sc4wPfr_24.g32561,Sc4wPfr_591.1.g32592,Sc4wPfr_839.g…	8.5545e-07	0.00217371	42688	59	258	43818	9578.83	34137.2	97.4212	193.659	0.0630813
GO:0036500	ATF6-mediated unfolded protein response	6	Sc4wPfr_158.2.g10594,Sc4wPfr_237.2.g16168,Sc4wPfr_384.g24822,Sc4wPfr_196.1.g29670,Sc4wPfr_2518.g31026,Sc4wPfr_177.1.g6200	6	Sc4wPfr_158.2.g10594,Sc4wPfr_237.2.g16168,Sc4wPfr_384.g24822,Sc4wPfr_196.1.g29670,Sc4wPfr_2518.g31026,Sc4wPfr_177.1.g6200	0	0	10273	3	13	10332	2215.83	8116.17	99.429	9.7746	0.0627721
GO:0005391	sodium:potassium-exchanging ATPase activity	8	Sc4wPfr_304.2.g12724,Sc4wPfr_1468.g12853,Sc4wPfr_292.g13103,Sc4wPfr_292.g13104,Sc4wPfr_4146.g26958,Sc4wPfr_98.g2687,Sc4wPfr_98.g2688,Sc4wPfr_98.g2697	8	Sc4wPfr_304.2.g12724,Sc4wPfr_1468.g12853,Sc4wPfr_292.g13103,Sc4wPfr_292.g13104,Sc4wPfr_4146.g26958,Sc4wPfr_98.g2687,Sc4wPfr_98.g2688,Sc4wPfr_98.g2697	0	0	12602	10	44	12669	2755.5	9913.5	99.4712	32.9893	0.0625386
GO:0005796	Golgi lumen	17	Sc4wPfr_104.g15001,Sc4wPfr_104.g15002,Sc4wPfr_352.g15737,Sc4wPfr_634.1.g17844,Sc4wPfr_634.1.g17845,Sc4wPfr_424.1.g2106,Sc4wPfr_424.1.g2106,Sc4wPfr_208.3.g23096,Sc4wPfr_384.g24903,Sc4wPfr_338.g25884,Sc4wPfr_44.g26901,Sc4wPfr_399.g28064,Sc4wPfr_287.2.g28262,Sc4wPfr_739.g28832,Sc4wPfr_48.g30209,Sc4wPfr_48.g30211,Sc4wPfr_691.g31315	16	Sc4wPfr_104.g15001,Sc4wPfr_104.g15002,Sc4wPfr_352.g15737,Sc4wPfr_634.1.g17844,Sc4wPfr_634.1.g17845,Sc4wPfr_424.1.g2106,Sc4wPfr_208.3.g23096,Sc4wPfr_384.g24903,Sc4wPfr_338.g25884,Sc4wPfr_44.g26901,Sc4wPfr_399.g28064,Sc4wPfr_287.2.g28262,Sc4wPfr_739.g28832,Sc4wPfr_48.g30209,Sc4wPfr_48.g30211,Sc4wPfr_691.g31315	1.6298e-08	4.6074e-05	25015	9	40	25191	5441.83	19749.2	99.3013	29.9347	0.0617126
GO:0006892	post-Golgi vesicle-mediated transport	33	Sc4wPfr_73.g11515,Sc4wPfr_161.1.g12910,Sc4wPfr_104.g15038,Sc4wPfr_104.g15038,Sc4wPfr_641.g16836,Sc4wPfr_602.g18713,Sc4wPfr_602.g18713,Sc4wPfr_10.g18987,Sc4wPfr_347.g19272,Sc4wPfr_347.g19274,Sc4wPfr_47.1.g2195,Sc4wPfr_789.g22434,Sc4wPfr_674.g26199,Sc4wPfr_470.g28919,Sc4wPfr_364.g29946,Sc4wPfr_363.2.g30345,Sc4wPfr_363.2.g30345,Sc4wPfr_363.2.g30349,Sc4wPfr_363.2.g30377,Sc4wPfr_1033.g30832,Sc4wPfr_10…	26	Sc4wPfr_73.g11515,Sc4wPfr_161.1.g12910,Sc4wPfr_104.g15038,Sc4wPfr_641.g16836,Sc4wPfr_602.g18713,Sc4wPfr_10.g18987,Sc4wPfr_347.g19274,Sc4wPfr_47.1.g2195,Sc4wPfr_789.g22434,Sc4wPfr_674.g26199,Sc4wPfr_470.g28919,Sc4wPfr_364.g29946,Sc4wPfr_363.2.g30345,Sc4wPfr_363.2.g30349,Sc4wPfr_363.2.g30377,Sc4wPfr_1033.g30832,Sc4wPfr_1036.g316,Sc4wPfr_628.g32867,Sc4wPfr_201.1.g33270,Sc4wPfr_200.g3473,Sc4wPfr_312.…	4.0682e-08	0.00011261	44067	60	268	44496	9632.5	34404.5	99.0359	200.379	0.0615833
GO:0097427	microtubule bundle	11	Sc4wPfr_165.g10084,Sc4wPfr_165.g10084,Sc4wPfr_165.g10084,Sc4wPfr_165.g10084,Sc4wPfr_96.g11950,Sc4wPfr_59.2.g12535,Sc4wPfr_1402.g13907,Sc4wPfr_776.g16569,Sc4wPfr_347.g19275,Sc4wPfr_187.g1957,Sc4wPfr_975.g7260	6	Sc4wPfr_165.g10084,Sc4wPfr_96.g11950,Sc4wPfr_59.2.g12535,Sc4wPfr_1402.g13907,Sc4wPfr_776.g16569,Sc4wPfr_347.g19275	0.0489153	1	15912	6	27	15971	3361.83	12103.2	99.6306	20.1601	0.0614147
GO:0061014	positive regulation of mRNA catabolic process	7	Sc4wPfr_382.g9971,Sc4wPfr_1010.g13514,Sc4wPfr_1964.g22086,Sc4wPfr_1964.g22087,Sc4wPfr_1964.g22088,Sc4wPfr_263.1.g30954,Sc4wPfr_38.g5828	7	Sc4wPfr_382.g9971,Sc4wPfr_1010.g13514,Sc4wPfr_1964.g22086,Sc4wPfr_1964.g22087,Sc4wPfr_1964.g22088,Sc4wPfr_263.1.g30954,Sc4wPfr_38.g5828	0	0	10745	4	19	10878	2432	8446	98.7773	14.051	0.0603232
GO:0090537	CERF complex	6	Sc4wPfr_2145.g14606,Sc4wPfr_2145.g14606,Sc4wPfr_250.g15999,Sc4wPfr_350.g2265,Sc4wPfr_350.g2265,Sc4wPfr_383.g33543	4	Sc4wPfr_2145.g14606,Sc4wPfr_250.g15999,Sc4wPfr_350.g2265,Sc4wPfr_383.g33543	0.0218486	1	10310	4	18	10418	2221.83	8146.17	98.9633	13.4401	0.060302
GO:0032211	negative regulation of telomere maintenance via telomerase	10	Sc4wPfr_433.g11156,Sc4wPfr_467.g16213,Sc4wPfr_224.g18120,Sc4wPfr_698.2.g23075,Sc4wPfr_162.1.g23866,Sc4wPfr_760.g24142,Sc4wPfr_760.g24143,Sc4wPfr_760.g24144,Sc4wPfr_115.g30167,Sc4wPfr_287.g9058	10	Sc4wPfr_433.g11156,Sc4wPfr_467.g16213,Sc4wPfr_224.g18120,Sc4wPfr_698.2.g23075,Sc4wPfr_162.1.g23866,Sc4wPfr_760.g24142,Sc4wPfr_760.g24143,Sc4wPfr_760.g24144,Sc4wPfr_115.g30167,Sc4wPfr_287.g9058	0	0	16384	7	33	16470	3649	12821	99.4778	24.4365	0.0600292
GO:0040016	embryonic cleavage	8	Sc4wPfr_523.g16331,Sc4wPfr_523.g16331,Sc4wPfr_347.g19276,Sc4wPfr_347.g19279,Sc4wPfr_347.g19282,Sc4wPfr_347.g19284,Sc4wPfr_126.2.g29277,Sc4wPfr_126.2.g29278	6	Sc4wPfr_523.g16331,Sc4wPfr_347.g19276,Sc4wPfr_347.g19279,Sc4wPfr_347.g19284,Sc4wPfr_126.2.g29277,Sc4wPfr_126.2.g29278	0.00346188	1	11328	3	14	11445	2477.67	8955.33	98.9777	10.3855	0.0590759
GO:0033169	histone H3-K9 demethylation	11	Sc4wPfr_615.g17529,Sc4wPfr_132.g22645,Sc4wPfr_132.g22645,Sc4wPfr_132.g22646,Sc4wPfr_106.g23544,Sc4wPfr_106.g23544,Sc4wPfr_674.1.g25720,Sc4wPfr_353.g28187,Sc4wPfr_189.g28479,Sc4wPfr_189.g28480,Sc4wPfr_396.g3060	7	Sc4wPfr_615.g17529,Sc4wPfr_132.g22645,Sc4wPfr_132.g22646,Sc4wPfr_106.g23544,Sc4wPfr_674.1.g25720,Sc4wPfr_353.g28187,Sc4wPfr_396.g3060	0.0118626	1	14020	2	9	14130	2955.33	11135.7	99.2215	6.72004	0.0588636
GO:0001931	uropod	10	Sc4wPfr_304.2.g12724,Sc4wPfr_304.2.g12725,Sc4wPfr_32.g14567,Sc4wPfr_523.g16385,Sc4wPfr_199.g28712,Sc4wPfr_199.g28712,Sc4wPfr_199.g28712,Sc4wPfr_1107.1.g29888,Sc4wPfr_582.g7491,Sc4wPfr_582.g7494	7	Sc4wPfr_304.2.g12724,Sc4wPfr_304.2.g12725,Sc4wPfr_523.g16385,Sc4wPfr_199.g28712,Sc4wPfr_1107.1.g29888,Sc4wPfr_582.g7491,Sc4wPfr_582.g7494	0.00466167	1	14030	8	36	14127	2972.67	11154.3	99.3134	26.8801	0.0587716
GO:0032455	nerve growth factor processing	9	Sc4wPfr_634.1.g17844,Sc4wPfr_634.1.g17845,Sc4wPfr_424.1.g2106,Sc4wPfr_424.1.g2106,Sc4wPfr_384.g24903,Sc4wPfr_338.g25884,Sc4wPfr_44.g26901,Sc4wPfr_48.g30209,Sc4wPfr_48.g30211	8	Sc4wPfr_634.1.g17844,Sc4wPfr_634.1.g17845,Sc4wPfr_424.1.g2106,Sc4wPfr_384.g24903,Sc4wPfr_338.g25884,Sc4wPfr_44.g26901,Sc4wPfr_48.g30209,Sc4wPfr_48.g30211	7.5488e-05	0.147546	18622	6	29	18756	4088.17	14667.8	99.2856	21.3819	0.057408
GO:0042809	vitamin D receptor binding	10	Sc4wPfr_352.g15734,Sc4wPfr_87.g16529,Sc4wPfr_224.g18100,Sc4wPfr_354.g19210,Sc4wPfr_135.g21755,Sc4wPfr_1969.g28113,Sc4wPfr_248.g29621,Sc4wPfr_364.g29945,Sc4wPfr_948.g31562,Sc4wPfr_305.g4589	6	Sc4wPfr_87.g16529,Sc4wPfr_224.g18100,Sc4wPfr_354.g19210,Sc4wPfr_1969.g28113,Sc4wPfr_248.g29621,Sc4wPfr_305.g4589	0.0253363	1	11100	6	29	11184	2429.33	8754.67	99.2489	21.3819	0.0569797
GO:0043209	myelin sheath	111	Sc4wPfr_1213.g1096,Sc4wPfr_73.g11515,Sc4wPfr_146.g12043,Sc4wPfr_146.g12043,Sc4wPfr_146.g12046,Sc4wPfr_146.g12046,Sc4wPfr_116.2.g12653,Sc4wPfr_292.g13104,Sc4wPfr_297.g13142,Sc4wPfr_423.g13418,Sc4wPfr_156.g13800,Sc4wPfr_396.1.g13857,Sc4wPfr_396.1.g13858,Sc4wPfr_32.g14498,Sc4wPfr_32.g14507,Sc4wPfr_32.g14508,Sc4wPfr_635.g14731,Sc4wPfr_365.g14958,Sc4wPfr_730.g15328,Sc4wPfr_730.g15330,Sc4wPfr_326.g1567…	105	Sc4wPfr_1213.g1096,Sc4wPfr_73.g11515,Sc4wPfr_146.g12043,Sc4wPfr_146.g12046,Sc4wPfr_116.2.g12653,Sc4wPfr_292.g13104,Sc4wPfr_297.g13142,Sc4wPfr_423.g13418,Sc4wPfr_156.g13800,Sc4wPfr_396.1.g13857,Sc4wPfr_396.1.g13858,Sc4wPfr_32.g14498,Sc4wPfr_32.g14507,Sc4wPfr_635.g14731,Sc4wPfr_365.g14958,Sc4wPfr_730.g15328,Sc4wPfr_730.g15330,Sc4wPfr_326.g15676,Sc4wPfr_237.2.g16168,Sc4wPfr_489.2.g16704,Sc4wPfr_489.…	3.3249e-42	1.1441e-38	129861	104	531	130983	29656.5	101110	99.1434	387.929	0.0567968
GO:0061628	H3K27me3 modified histone binding	10	Sc4wPfr_350.g2265,Sc4wPfr_350.g2265,Sc4wPfr_475.1.g23423,Sc4wPfr_39.1.g26772,Sc4wPfr_39.1.g26772,Sc4wPfr_39.1.g26772,Sc4wPfr_39.1.g26772,Sc4wPfr_39.1.g26772,Sc4wPfr_1514.g5394,Sc4wPfr_719.g8302	5	Sc4wPfr_350.g2265,Sc4wPfr_475.1.g23423,Sc4wPfr_39.1.g26772,Sc4wPfr_1514.g5394,Sc4wPfr_719.g8302	0.093028	1	20072	4	19	20259	4278.17	15896.8	99.077	14.051	0.0564985
GO:0098532	histone H3-K27 trimethylation	10	Sc4wPfr_350.g2265,Sc4wPfr_350.g2265,Sc4wPfr_475.1.g23423,Sc4wPfr_39.1.g26772,Sc4wPfr_39.1.g26772,Sc4wPfr_39.1.g26772,Sc4wPfr_39.1.g26772,Sc4wPfr_39.1.g26772,Sc4wPfr_1514.g5394,Sc4wPfr_719.g8302	5	Sc4wPfr_350.g2265,Sc4wPfr_475.1.g23423,Sc4wPfr_39.1.g26772,Sc4wPfr_1514.g5394,Sc4wPfr_719.g8302	0.093028	1	20072	4	19	20259	4278.17	15896.8	99.077	14.051	0.0564985
GO:0071004	U2-type prespliceosome	20	Sc4wPfr_1463.g9577,Sc4wPfr_322.g12149,Sc4wPfr_322.g12149,Sc4wPfr_322.g12150,Sc4wPfr_133.g14100,Sc4wPfr_419.g14298,Sc4wPfr_419.g14301,Sc4wPfr_262.2.g17784,Sc4wPfr_761.g1923,Sc4wPfr_563.g19748,Sc4wPfr_455.g20391,Sc4wPfr_455.g20391,Sc4wPfr_908.g21208,Sc4wPfr_908.g21208,Sc4wPfr_568.g22805,Sc4wPfr_405.g27544,Sc4wPfr_82.1.g28989,Sc4wPfr_82.1.g28991,Sc4wPfr_672.g32786,Sc4wPfr_850.1.g5715	17	Sc4wPfr_1463.g9577,Sc4wPfr_322.g12149,Sc4wPfr_322.g12150,Sc4wPfr_133.g14100,Sc4wPfr_419.g14298,Sc4wPfr_419.g14301,Sc4wPfr_262.2.g17784,Sc4wPfr_761.g1923,Sc4wPfr_563.g19748,Sc4wPfr_455.g20391,Sc4wPfr_908.g21208,Sc4wPfr_568.g22805,Sc4wPfr_405.g27544,Sc4wPfr_82.1.g28989,Sc4wPfr_82.1.g28991,Sc4wPfr_672.g32786,Sc4wPfr_850.1.g5715	4.8454e-07	0.00125158	22266	10	52	22517	5094	17412	98.8853	37.8766	0.0558986
GO:0071353	cellular response to interleukin-4	18	Sc4wPfr_237.2.g16168,Sc4wPfr_519.g17994,Sc4wPfr_139.g196,Sc4wPfr_270.1.g19654,Sc4wPfr_270.1.g19655,Sc4wPfr_439.g20911,Sc4wPfr_53.g21913,Sc4wPfr_1009.3.g22533,Sc4wPfr_319.g27364,Sc4wPfr_739.g28847,Sc4wPfr_739.g28849,Sc4wPfr_2518.g31026,Sc4wPfr_1007.g33076,Sc4wPfr_548.g4905,Sc4wPfr_719.g8266,Sc4wPfr_719.g8295,Sc4wPfr_289.1.g8521,Sc4wPfr_289.1.g8528	18	Sc4wPfr_237.2.g16168,Sc4wPfr_519.g17994,Sc4wPfr_139.g196,Sc4wPfr_270.1.g19654,Sc4wPfr_270.1.g19655,Sc4wPfr_439.g20911,Sc4wPfr_53.g21913,Sc4wPfr_1009.3.g22533,Sc4wPfr_319.g27364,Sc4wPfr_739.g28847,Sc4wPfr_739.g28849,Sc4wPfr_2518.g31026,Sc4wPfr_1007.g33076,Sc4wPfr_548.g4905,Sc4wPfr_719.g8266,Sc4wPfr_719.g8295,Sc4wPfr_289.1.g8521,Sc4wPfr_289.1.g8528	0	0	23977	20	102	24125	5364	18639	99.3865	74.5313	0.0557497
GO:0050732	negative regulation of peptidyl-tyrosine phosphorylation	10	Sc4wPfr_174.g11845,Sc4wPfr_6.g19165,Sc4wPfr_761.g1928,Sc4wPfr_91.g23189,Sc4wPfr_948.g31562,Sc4wPfr_1788.g33563,Sc4wPfr_1788.g33564,Sc4wPfr_1788.g33565,Sc4wPfr_1788.g33566,Sc4wPfr_246.g4305	7	Sc4wPfr_174.g11845,Sc4wPfr_6.g19165,Sc4wPfr_91.g23189,Sc4wPfr_1788.g33563,Sc4wPfr_1788.g33564,Sc4wPfr_1788.g33566,Sc4wPfr_246.g4305	0.00466167	1	10348	3	15	10629	2306.67	8322.33	97.3563	10.9964	0.0552058
GO:0072562	blood microparticle	41	Sc4wPfr_307.g9664,Sc4wPfr_1300.g9807,Sc4wPfr_1300.g9808,Sc4wPfr_73.g11511,Sc4wPfr_73.g11515,Sc4wPfr_766.g13544,Sc4wPfr_766.g13544,Sc4wPfr_1634.g13741,Sc4wPfr_575.g14670,Sc4wPfr_208.2.g17704,Sc4wPfr_208.2.g17705,Sc4wPfr_543.g19544,Sc4wPfr_422.g20156,Sc4wPfr_79.3.g21346,Sc4wPfr_79.3.g21347,Sc4wPfr_1009.3.g22541,Sc4wPfr_208.3.g23106,Sc4wPfr_796.g23304,Sc4wPfr_796.g23304,Sc4wPfr_2949.g24294,Sc4wPfr_3…	30	Sc4wPfr_307.g9664,Sc4wPfr_1300.g9807,Sc4wPfr_1300.g9808,Sc4wPfr_73.g11511,Sc4wPfr_73.g11515,Sc4wPfr_766.g13544,Sc4wPfr_1634.g13741,Sc4wPfr_575.g14670,Sc4wPfr_208.2.g17704,Sc4wPfr_543.g19544,Sc4wPfr_79.3.g21346,Sc4wPfr_79.3.g21347,Sc4wPfr_1009.3.g22541,Sc4wPfr_208.3.g23106,Sc4wPfr_796.g23304,Sc4wPfr_2949.g24294,Sc4wPfr_391.g24626,Sc4wPfr_30.g2616,Sc4wPfr_44.g26864,Sc4wPfr_319.g27294,Sc4wPfr_319.g2…	1.1578e-07	0.00031259	45542	54	279	45987	10080.5	35096.5	99.0323	203.434	0.0546153
GO:0070411	I-SMAD binding	17	Sc4wPfr_2313.g10578,Sc4wPfr_1844.g14252,Sc4wPfr_679.g1431,Sc4wPfr_365.g14938,Sc4wPfr_615.g17540,Sc4wPfr_958.g18792,Sc4wPfr_66.g19077,Sc4wPfr_798.g21016,Sc4wPfr_796.g23311,Sc4wPfr_137.g27950,Sc4wPfr_137.g27953,Sc4wPfr_1495.g2867,Sc4wPfr_363.3.g30478,Sc4wPfr_363.3.g30507,Sc4wPfr_1495.1.g33048,Sc4wPfr_246.g4304,Sc4wPfr_975.g7262	17	Sc4wPfr_2313.g10578,Sc4wPfr_1844.g14252,Sc4wPfr_679.g1431,Sc4wPfr_365.g14938,Sc4wPfr_615.g17540,Sc4wPfr_958.g18792,Sc4wPfr_66.g19077,Sc4wPfr_798.g21016,Sc4wPfr_796.g23311,Sc4wPfr_137.g27950,Sc4wPfr_137.g27953,Sc4wPfr_1495.g2867,Sc4wPfr_363.3.g30478,Sc4wPfr_363.3.g30507,Sc4wPfr_1495.1.g33048,Sc4wPfr_246.g4304,Sc4wPfr_975.g7262	0	0	25495	9	47	25626	5653.67	19972.3	99.4888	34.2111	0.0539211
GO:0098641	cadherin binding involved in cell-cell adhesion	23	Sc4wPfr_304.2.g12724,Sc4wPfr_274.1.g13592,Sc4wPfr_32.g14507,Sc4wPfr_32.g14508,Sc4wPfr_365.g14954,Sc4wPfr_17.g15841,Sc4wPfr_237.2.g16168,Sc4wPfr_181.g16619,Sc4wPfr_519.g18019,Sc4wPfr_347.g19275,Sc4wPfr_439.g20897,Sc4wPfr_977.g21613,Sc4wPfr_699.g21675,Sc4wPfr_2515.g28086,Sc4wPfr_121.g2854,Sc4wPfr_463.g30896,Sc4wPfr_1788.g33570,Sc4wPfr_502.g33806,Sc4wPfr_200.g3528,Sc4wPfr_11.g7394,Sc4wPfr_269.g7752,…	22	Sc4wPfr_304.2.g12724,Sc4wPfr_274.1.g13592,Sc4wPfr_32.g14507,Sc4wPfr_365.g14954,Sc4wPfr_17.g15841,Sc4wPfr_237.2.g16168,Sc4wPfr_181.g16619,Sc4wPfr_519.g18019,Sc4wPfr_347.g19275,Sc4wPfr_439.g20897,Sc4wPfr_977.g21613,Sc4wPfr_699.g21675,Sc4wPfr_2515.g28086,Sc4wPfr_121.g2854,Sc4wPfr_463.g30896,Sc4wPfr_1788.g33570,Sc4wPfr_502.g33806,Sc4wPfr_200.g3528,Sc4wPfr_11.g7394,Sc4wPfr_269.g7752,Sc4wPfr_289.1.g852…	2.8961e-11	8.8012e-08	30461	18	92	30738	6663.5	24074.5	99.0988	67.2004	0.0536807
GO:0034314	Arp2/3 complex-mediated actin nucleation	12	Sc4wPfr_1463.g9569,Sc4wPfr_197.g11020,Sc4wPfr_523.g16340,Sc4wPfr_231.1.g21564,Sc4wPfr_586.g22360,Sc4wPfr_106.g23562,Sc4wPfr_4.g26125,Sc4wPfr_263.1.g30984,Sc4wPfr_338.1.g31637,Sc4wPfr_338.1.g31638,Sc4wPfr_338.1.g31647,Sc4wPfr_431.1.g33599	12	Sc4wPfr_1463.g9569,Sc4wPfr_197.g11020,Sc4wPfr_523.g16340,Sc4wPfr_231.1.g21564,Sc4wPfr_586.g22360,Sc4wPfr_106.g23562,Sc4wPfr_4.g26125,Sc4wPfr_263.1.g30984,Sc4wPfr_338.1.g31637,Sc4wPfr_338.1.g31638,Sc4wPfr_338.1.g31647,Sc4wPfr_431.1.g33599	0	0	11917	3	16	12039	2648.83	9390.17	98.9866	11.6073	0.052689
GO:0043021	ribonucleoprotein complex binding	15	Sc4wPfr_1687.g11219,Sc4wPfr_180.g11658,Sc4wPfr_1362.g13672,Sc4wPfr_226.g15124,Sc4wPfr_776.g16567,Sc4wPfr_313.g17060,Sc4wPfr_804.g24112,Sc4wPfr_804.g24124,Sc4wPfr_412.g24354,Sc4wPfr_56.g24520,Sc4wPfr_399.g28069,Sc4wPfr_82.1.g28968,Sc4wPfr_856.g31442,Sc4wPfr_381.1.g32124,Sc4wPfr_390.g5621	15	Sc4wPfr_1687.g11219,Sc4wPfr_180.g11658,Sc4wPfr_1362.g13672,Sc4wPfr_226.g15124,Sc4wPfr_776.g16567,Sc4wPfr_313.g17060,Sc4wPfr_804.g24112,Sc4wPfr_804.g24124,Sc4wPfr_412.g24354,Sc4wPfr_56.g24520,Sc4wPfr_399.g28069,Sc4wPfr_82.1.g28968,Sc4wPfr_856.g31442,Sc4wPfr_381.1.g32124,Sc4wPfr_390.g5621	0	0	19996	6	32	20313	4471.33	15841.7	98.4394	23.2147	0.0526825
GO:0005845	mRNA cap binding complex	15	Sc4wPfr_165.g10037,Sc4wPfr_165.g10037,Sc4wPfr_165.g10037,Sc4wPfr_165.g10039,Sc4wPfr_165.g10041,Sc4wPfr_433.g11150,Sc4wPfr_433.g11153,Sc4wPfr_572.g15444,Sc4wPfr_489.2.g16677,Sc4wPfr_347.g19334,Sc4wPfr_347.g19339,Sc4wPfr_1163.g25146,Sc4wPfr_30.g2624,Sc4wPfr_2727.g31999,Sc4wPfr_826.g32464	13	Sc4wPfr_165.g10037,Sc4wPfr_165.g10039,Sc4wPfr_165.g10041,Sc4wPfr_433.g11150,Sc4wPfr_433.g11153,Sc4wPfr_572.g15444,Sc4wPfr_489.2.g16677,Sc4wPfr_347.g19334,Sc4wPfr_347.g19339,Sc4wPfr_1163.g25146,Sc4wPfr_30.g2624,Sc4wPfr_2727.g31999,Sc4wPfr_826.g32464	3.9121e-06	0.00928339	10528	3	16	10704	2308.17	8332.83	98.3558	11.6073	0.0517089
GO:0046716	muscle cell cellular homeostasis	11	Sc4wPfr_59.2.g12406,Sc4wPfr_292.g13058,Sc4wPfr_208.1.g13279,Sc4wPfr_87.g16526,Sc4wPfr_628.g32834,Sc4wPfr_173.2.g33001,Sc4wPfr_173.2.g33005,Sc4wPfr_240.g3641,Sc4wPfr_240.g3641,Sc4wPfr_240.g3641,Sc4wPfr_232.g4550	8	Sc4wPfr_59.2.g12406,Sc4wPfr_292.g13058,Sc4wPfr_208.1.g13279,Sc4wPfr_628.g32834,Sc4wPfr_173.2.g33001,Sc4wPfr_173.2.g33005,Sc4wPfr_240.g3641,Sc4wPfr_232.g4550	0.00196131	1	18359	3	16	18573	3801	14004	98.8478	11.6073	0.050756
GO:0072357	PTW/PP1 phosphatase complex	14	Sc4wPfr_504.g10324,Sc4wPfr_504.g10324,Sc4wPfr_1909.g11473,Sc4wPfr_180.g11658,Sc4wPfr_144.1.g11745,Sc4wPfr_1362.g13635,Sc4wPfr_226.g15124,Sc4wPfr_252.1.g15342,Sc4wPfr_45.2.g19825,Sc4wPfr_361.g20364,Sc4wPfr_908.g21219,Sc4wPfr_586.g22365,Sc4wPfr_856.g31442,Sc4wPfr_172.g6070	12	Sc4wPfr_504.g10324,Sc4wPfr_1909.g11473,Sc4wPfr_180.g11658,Sc4wPfr_144.1.g11745,Sc4wPfr_1362.g13635,Sc4wPfr_226.g15124,Sc4wPfr_252.1.g15342,Sc4wPfr_45.2.g19825,Sc4wPfr_361.g20364,Sc4wPfr_586.g22365,Sc4wPfr_856.g31442,Sc4wPfr_172.g6070	1.0513e-05	0.0235703	15140	4	22	15213	3315.83	11864.2	99.5201	15.8837	0.0506014
GO:0005685	U1 snRNP	14	Sc4wPfr_1463.g9577,Sc4wPfr_696.g10813,Sc4wPfr_133.g14100,Sc4wPfr_419.g14298,Sc4wPfr_419.g14301,Sc4wPfr_181.g16620,Sc4wPfr_563.g19748,Sc4wPfr_568.g22805,Sc4wPfr_343.1.g25991,Sc4wPfr_405.g27544,Sc4wPfr_381.1.g32188,Sc4wPfr_957.g32684,Sc4wPfr_850.1.g5715,Sc4wPfr_941.g5939	14	Sc4wPfr_1463.g9577,Sc4wPfr_696.g10813,Sc4wPfr_133.g14100,Sc4wPfr_419.g14298,Sc4wPfr_419.g14301,Sc4wPfr_181.g16620,Sc4wPfr_563.g19748,Sc4wPfr_568.g22805,Sc4wPfr_343.1.g25991,Sc4wPfr_405.g27544,Sc4wPfr_381.1.g32188,Sc4wPfr_957.g32684,Sc4wPfr_850.1.g5715,Sc4wPfr_941.g5939	0	0	10302	6	33	10398	2279.83	8118.17	99.0767	23.8256	0.0505908
GO:0043101	purine-containing compound salvage	8	Sc4wPfr_952.1.g9521,Sc4wPfr_519.g18028,Sc4wPfr_8.g18249,Sc4wPfr_134.g20075,Sc4wPfr_134.g20080,Sc4wPfr_1077.g31063,Sc4wPfr_144.3.g33728,Sc4wPfr_839.g4000	6	Sc4wPfr_8.g18249,Sc4wPfr_134.g20075,Sc4wPfr_134.g20080,Sc4wPfr_1077.g31063,Sc4wPfr_144.3.g33728,Sc4wPfr_839.g4000	0.00346188	1	11266	3	18	11640	2639.17	9000.83	96.7869	12.8292	0.0486572
GO:0033148	positive regulation of intracellular estrogen receptor signaling pathway	7	Sc4wPfr_2616.g10482,Sc4wPfr_27.g12217,Sc4wPfr_804.g24126,Sc4wPfr_334.g26615,Sc4wPfr_1036.g319,Sc4wPfr_1036.g319,Sc4wPfr_1201.1.g8691	6	Sc4wPfr_2616.g10482,Sc4wPfr_27.g12217,Sc4wPfr_804.g24126,Sc4wPfr_334.g26615,Sc4wPfr_1036.g319,Sc4wPfr_1201.1.g8691	0.0006224	0.964724	19298	5	28	19431	4173.17	15257.8	99.3155	20.1601	0.0486329
GO:1901522	positive regulation of transcription from RNA polymerase II promoter involved in cellular response to chemical stimulus	10	Sc4wPfr_1844.g14252,Sc4wPfr_224.g18100,Sc4wPfr_8.g18245,Sc4wPfr_1085.g19602,Sc4wPfr_137.g27950,Sc4wPfr_137.g27953,Sc4wPfr_364.g29945,Sc4wPfr_363.3.g30478,Sc4wPfr_363.3.g30507,Sc4wPfr_330.g6880	9	Sc4wPfr_1844.g14252,Sc4wPfr_224.g18100,Sc4wPfr_8.g18245,Sc4wPfr_1085.g19602,Sc4wPfr_137.g27950,Sc4wPfr_137.g27953,Sc4wPfr_363.3.g30478,Sc4wPfr_363.3.g30507,Sc4wPfr_330.g6880	2.6287e-05	0.0563331	11519	2	12	11568	2596.5	8971.5	99.5764	8.55277	0.0480945
GO:0097149	centralspindlin complex	8	Sc4wPfr_547.1.g24950,Sc4wPfr_547.1.g24951,Sc4wPfr_547.1.g24951,Sc4wPfr_627.g26943,Sc4wPfr_627.g26943,Sc4wPfr_169.g29115,Sc4wPfr_169.g29115,Sc4wPfr_194.g32429	5	Sc4wPfr_547.1.g24950,Sc4wPfr_547.1.g24951,Sc4wPfr_627.g26943,Sc4wPfr_169.g29115,Sc4wPfr_194.g32429	0.0247137	1	11911	4	22	12020	2483.83	9375.17	99.0932	15.8837	0.0478991
GO:0001205	distal enhancer DNA-binding transcription activator activity, RNA polymerase II-specific	10	Sc4wPfr_945.g15387,Sc4wPfr_250.g15997,Sc4wPfr_107.1.g20637,Sc4wPfr_1241.g21489,Sc4wPfr_293.g24401,Sc4wPfr_2124.g26585,Sc4wPfr_226.1.g26815,Sc4wPfr_263.1.g30963,Sc4wPfr_287.g9045,Sc4wPfr_287.g9045	7	Sc4wPfr_945.g15387,Sc4wPfr_250.g15997,Sc4wPfr_107.1.g20637,Sc4wPfr_2124.g26585,Sc4wPfr_226.1.g26815,Sc4wPfr_263.1.g30963,Sc4wPfr_287.g9045	0.00466167	1	12452	2	12	12519	2778	9714	99.4648	8.55277	0.0475323
GO:0046034	ATP metabolic process	32	Sc4wPfr_73.g11515,Sc4wPfr_59.2.g12533,Sc4wPfr_292.g13103,Sc4wPfr_292.g13104,Sc4wPfr_297.g13142,Sc4wPfr_635.g14731,Sc4wPfr_422.g20156,Sc4wPfr_1556.g21993,Sc4wPfr_1556.g21994,Sc4wPfr_1556.g21995,Sc4wPfr_698.2.g23061,Sc4wPfr_384.g24798,Sc4wPfr_384.g24802,Sc4wPfr_343.1.g25984,Sc4wPfr_343.1.g25984,Sc4wPfr_4146.g26959,Sc4wPfr_954.g27089,Sc4wPfr_98.g2686,Sc4wPfr_98.g2687,Sc4wPfr_98.g2688,Sc4wPfr_98.g269…	29	Sc4wPfr_73.g11515,Sc4wPfr_59.2.g12533,Sc4wPfr_292.g13103,Sc4wPfr_292.g13104,Sc4wPfr_297.g13142,Sc4wPfr_635.g14731,Sc4wPfr_1556.g21993,Sc4wPfr_1556.g21994,Sc4wPfr_1556.g21995,Sc4wPfr_384.g24798,Sc4wPfr_384.g24802,Sc4wPfr_343.1.g25984,Sc4wPfr_4146.g26959,Sc4wPfr_954.g27089,Sc4wPfr_98.g2686,Sc4wPfr_98.g2687,Sc4wPfr_98.g2688,Sc4wPfr_98.g2699,Sc4wPfr_98.g2700,Sc4wPfr_759.g27583,Sc4wPfr_364.g29946,Sc4w…	3.9007e-12	1.2045e-08	46027	50	300	46300	10309.7	35938.3	99.4104	213.819	0.0469217
GO:0004298	threonine-type endopeptidase activity	13	Sc4wPfr_307.g9666,Sc4wPfr_773.g11729,Sc4wPfr_773.g11730,Sc4wPfr_90.g1171,Sc4wPfr_921.g15154,Sc4wPfr_14.g1781,Sc4wPfr_475.1.g23433,Sc4wPfr_226.1.g26839,Sc4wPfr_405.g27535,Sc4wPfr_536.g2774,Sc4wPfr_82.1.g28985,Sc4wPfr_363.3.g30531,Sc4wPfr_179.g7824	13	Sc4wPfr_307.g9666,Sc4wPfr_773.g11729,Sc4wPfr_773.g11730,Sc4wPfr_90.g1171,Sc4wPfr_921.g15154,Sc4wPfr_14.g1781,Sc4wPfr_475.1.g23433,Sc4wPfr_226.1.g26839,Sc4wPfr_405.g27535,Sc4wPfr_536.g2774,Sc4wPfr_82.1.g28985,Sc4wPfr_363.3.g30531,Sc4wPfr_179.g7824	0	0	10301	3	19	10398	2376.33	8021.67	99.0671	13.4401	0.0465365
GO:0060765	regulation of androgen receptor signaling pathway	11	Sc4wPfr_85.g928,Sc4wPfr_469.1.g10205,Sc4wPfr_59.2.g12523,Sc4wPfr_1007.1.g17161,Sc4wPfr_2518.g31028,Sc4wPfr_2518.g31028,Sc4wPfr_1036.g319,Sc4wPfr_290.1.g3112,Sc4wPfr_1036.g319,Sc4wPfr_914.g6899,Sc4wPfr_229.g6975	9	Sc4wPfr_85.g928,Sc4wPfr_469.1.g10205,Sc4wPfr_59.2.g12523,Sc4wPfr_1007.1.g17161,Sc4wPfr_2518.g31028,Sc4wPfr_1036.g319,Sc4wPfr_290.1.g3112,Sc4wPfr_914.g6899,Sc4wPfr_229.g6975	0.00019762	0.349793	18713	2	12	18816	4095.33	14720.7	99.4526	8.55277	0.0462807
GO:0061024	membrane organization	37	Sc4wPfr_73.g11515,Sc4wPfr_304.2.g12725,Sc4wPfr_423.g13436,Sc4wPfr_423.g13436,Sc4wPfr_618.g14867,Sc4wPfr_618.g14868,Sc4wPfr_365.g14977,Sc4wPfr_1080.g15232,Sc4wPfr_1080.g15233,Sc4wPfr_1080.g15235,Sc4wPfr_236.g17548,Sc4wPfr_654.g18218,Sc4wPfr_482.g19125,Sc4wPfr_238.g21277,Sc4wPfr_47.1.g2195,Sc4wPfr_639.g22919,Sc4wPfr_639.g22924,Sc4wPfr_247.g24191,Sc4wPfr_384.g24810,Sc4wPfr_384.g24810,Sc4wPfr_384.g24…	28	Sc4wPfr_73.g11515,Sc4wPfr_304.2.g12725,Sc4wPfr_423.g13436,Sc4wPfr_618.g14867,Sc4wPfr_618.g14868,Sc4wPfr_365.g14977,Sc4wPfr_1080.g15233,Sc4wPfr_1080.g15235,Sc4wPfr_236.g17548,Sc4wPfr_482.g19125,Sc4wPfr_238.g21277,Sc4wPfr_47.1.g2195,Sc4wPfr_247.g24191,Sc4wPfr_384.g24810,Sc4wPfr_44.g26865,Sc4wPfr_520.g29421,Sc4wPfr_248.2.g2914,Sc4wPfr_248.g29628,Sc4wPfr_364.g29946,Sc4wPfr_29.g30098,Sc4wPfr_363.2.g30…	7.5311e-08	0.000205	45368	56	334	45675	9846.33	35828.7	99.3279	238.256	0.0450741
GO:0034774	secretory granule lumen	8	Sc4wPfr_424.1.g2106,Sc4wPfr_424.1.g2106,Sc4wPfr_384.g24903,Sc4wPfr_338.g25884,Sc4wPfr_44.g26901,Sc4wPfr_48.g30209,Sc4wPfr_48.g30211,Sc4wPfr_62.g4435	7	Sc4wPfr_424.1.g2106,Sc4wPfr_384.g24903,Sc4wPfr_338.g25884,Sc4wPfr_44.g26901,Sc4wPfr_48.g30209,Sc4wPfr_48.g30211,Sc4wPfr_62.g4435	0.00021676	0.376301	18488	5	31	18573	4028.83	14544.2	99.5423	21.9928	0.0444591
GO:0051571	positive regulation of histone H3-K4 methylation	11	Sc4wPfr_1463.g9565,Sc4wPfr_423.g13448,Sc4wPfr_250.g16039,Sc4wPfr_250.g16039,Sc4wPfr_252.g22303,Sc4wPfr_252.g22304,Sc4wPfr_363.3.g30478,Sc4wPfr_363.3.g30507,Sc4wPfr_207.g3950,Sc4wPfr_305.g4589,Sc4wPfr_975.g7262	10	Sc4wPfr_1463.g9565,Sc4wPfr_423.g13448,Sc4wPfr_250.g16039,Sc4wPfr_252.g22303,Sc4wPfr_252.g22304,Sc4wPfr_363.3.g30478,Sc4wPfr_363.3.g30507,Sc4wPfr_207.g3950,Sc4wPfr_305.g4589,Sc4wPfr_975.g7262	9.1534e-06	0.0208607	20703	3	19	20840	4519.83	16219.2	99.3426	13.4401	0.0438829
GO:0009994	oocyte differentiation	1	Sc4wPfr_1201.1.g8691	1	Sc4wPfr_1201.1.g8691	0	0	10816	3	19	10842	2330.5	8511.5	99.7602	13.4401	0.0430072
GO:0090084	negative regulation of inclusion body assembly	13	Sc4wPfr_73.g11515,Sc4wPfr_773.g11727,Sc4wPfr_59.2.g12418,Sc4wPfr_1402.g13909,Sc4wPfr_1402.g13915,Sc4wPfr_14.g1834,Sc4wPfr_463.g30885,Sc4wPfr_691.g31371,Sc4wPfr_62.g4480,Sc4wPfr_850.1.g5716,Sc4wPfr_38.g5810,Sc4wPfr_1044.g6839,Sc4wPfr_1044.g6841	12	Sc4wPfr_73.g11515,Sc4wPfr_773.g11727,Sc4wPfr_59.2.g12418,Sc4wPfr_1402.g13915,Sc4wPfr_14.g1834,Sc4wPfr_463.g30885,Sc4wPfr_691.g31371,Sc4wPfr_62.g4480,Sc4wPfr_850.1.g5716,Sc4wPfr_38.g5810,Sc4wPfr_1044.g6839,Sc4wPfr_1044.g6841	1.1097e-06	0.00279638	11249	4	26	11307	2451.83	8855.17	99.487	18.3274	0.0423081
GO:0006986	response to unfolded protein	28	Sc4wPfr_73.g11515,Sc4wPfr_773.g11727,Sc4wPfr_59.2.g12418,Sc4wPfr_1402.g13909,Sc4wPfr_1402.g13915,Sc4wPfr_252.1.g15360,Sc4wPfr_172.1.g1589,Sc4wPfr_239.g21065,Sc4wPfr_650.g22977,Sc4wPfr_68.g2327,Sc4wPfr_68.g2382,Sc4wPfr_412.g24353,Sc4wPfr_251.g2463,Sc4wPfr_706.g27784,Sc4wPfr_113.1.g28311,Sc4wPfr_113.1.g28312,Sc4wPfr_739.g28831,Sc4wPfr_364.g29946,Sc4wPfr_62.g4480,Sc4wPfr_87.1.g5289,Sc4wPfr_629.g5409…	26	Sc4wPfr_73.g11515,Sc4wPfr_773.g11727,Sc4wPfr_59.2.g12418,Sc4wPfr_1402.g13915,Sc4wPfr_252.1.g15360,Sc4wPfr_239.g21065,Sc4wPfr_650.g22977,Sc4wPfr_68.g2327,Sc4wPfr_68.g2382,Sc4wPfr_412.g24353,Sc4wPfr_251.g2463,Sc4wPfr_706.g27784,Sc4wPfr_113.1.g28311,Sc4wPfr_113.1.g28312,Sc4wPfr_739.g28831,Sc4wPfr_364.g29946,Sc4wPfr_62.g4480,Sc4wPfr_87.1.g5289,Sc4wPfr_629.g5409,Sc4wPfr_38.g5810,Sc4wPfr_1235.g6359,Sc4…	7.897e-12	2.4275e-08	38607	46	297	38808	8472.83	30335.2	99.4821	209.543	0.0422835
GO:0016574	histone ubiquitination	16	Sc4wPfr_272.g11371,Sc4wPfr_272.g11372,Sc4wPfr_250.g16022,Sc4wPfr_26.g17221,Sc4wPfr_26.g17227,Sc4wPfr_26.g17230,Sc4wPfr_958.g18786,Sc4wPfr_958.g18792,Sc4wPfr_270.1.g19657,Sc4wPfr_270.1.g19661,Sc4wPfr_270.1.g19663,Sc4wPfr_68.g2382,Sc4wPfr_384.g24867,Sc4wPfr_199.g28685,Sc4wPfr_590.1.g31279,Sc4wPfr_481.g31582	12	Sc4wPfr_272.g11372,Sc4wPfr_250.g16022,Sc4wPfr_26.g17227,Sc4wPfr_26.g17230,Sc4wPfr_958.g18792,Sc4wPfr_270.1.g19661,Sc4wPfr_270.1.g19663,Sc4wPfr_68.g2382,Sc4wPfr_384.g24867,Sc4wPfr_199.g28685,Sc4wPfr_590.1.g31279,Sc4wPfr_481.g31582	0.00019326	0.34477	13226	6	40	13335	2937.5	10397.5	99.1826	28.102	0.0420083
GO:2000643	positive regulation of early endosome to late endosome transport	16	Sc4wPfr_469.1.g10221,Sc4wPfr_469.1.g10222,Sc4wPfr_469.1.g10224,Sc4wPfr_469.1.g10225,Sc4wPfr_469.1.g10225,Sc4wPfr_469.1.g10225,Sc4wPfr_178.g10646,Sc4wPfr_32.g14567,Sc4wPfr_224.g18182,Sc4wPfr_10.g18950,Sc4wPfr_7.1.g19875,Sc4wPfr_1375.g21976,Sc4wPfr_412.g24336,Sc4wPfr_582.g7491,Sc4wPfr_582.g7494,Sc4wPfr_3478.g7893	12	Sc4wPfr_469.1.g10221,Sc4wPfr_469.1.g10222,Sc4wPfr_469.1.g10224,Sc4wPfr_469.1.g10225,Sc4wPfr_178.g10646,Sc4wPfr_10.g18950,Sc4wPfr_7.1.g19875,Sc4wPfr_1375.g21976,Sc4wPfr_412.g24336,Sc4wPfr_582.g7491,Sc4wPfr_582.g7494,Sc4wPfr_3478.g7893	0.00019326	0.34477	14252	5	33	14402	3036.17	11318.8	98.9585	23.2147	0.0403591
GO:0031072	heat shock protein binding	41	Sc4wPfr_388.1.g10262,Sc4wPfr_73.g11515,Sc4wPfr_174.g11811,Sc4wPfr_174.g11859,Sc4wPfr_322.g12148,Sc4wPfr_27.g12217,Sc4wPfr_635.g14707,Sc4wPfr_14.g1834,Sc4wPfr_1096.g19446,Sc4wPfr_422.g20156,Sc4wPfr_188.g2076,Sc4wPfr_424.1.g2149,Sc4wPfr_688.g21883,Sc4wPfr_1903.g23139,Sc4wPfr_796.g23308,Sc4wPfr_622.g24253,Sc4wPfr_293.g24400,Sc4wPfr_547.1.g24989,Sc4wPfr_674.1.g25729,Sc4wPfr_599.g27236,Sc4wPfr_287.2.g…	38	Sc4wPfr_388.1.g10262,Sc4wPfr_73.g11515,Sc4wPfr_174.g11811,Sc4wPfr_322.g12148,Sc4wPfr_27.g12217,Sc4wPfr_635.g14707,Sc4wPfr_14.g1834,Sc4wPfr_1096.g19446,Sc4wPfr_188.g2076,Sc4wPfr_424.1.g2149,Sc4wPfr_688.g21883,Sc4wPfr_1903.g23139,Sc4wPfr_796.g23308,Sc4wPfr_622.g24253,Sc4wPfr_293.g24400,Sc4wPfr_547.1.g24989,Sc4wPfr_674.1.g25729,Sc4wPfr_599.g27236,Sc4wPfr_287.2.g28216,Sc4wPfr_113.1.g28332,Sc4wPfr_506…	4.7613e-16	1.5465e-12	54650	43	295	55297	11890.2	43129.8	98.83	206.488	0.0395422
GO:0042470	melanosome	48	Sc4wPfr_388.1.g10262,Sc4wPfr_524.g10738,Sc4wPfr_73.g11515,Sc4wPfr_304.2.g12724,Sc4wPfr_1634.g13741,Sc4wPfr_635.g14731,Sc4wPfr_730.g15328,Sc4wPfr_730.g15330,Sc4wPfr_1100.g15616,Sc4wPfr_326.g15644,Sc4wPfr_237.2.g16168,Sc4wPfr_208.2.g17704,Sc4wPfr_347.g19272,Sc4wPfr_1062.g19617,Sc4wPfr_1062.g19618,Sc4wPfr_977.1.g21529,Sc4wPfr_565.g22057,Sc4wPfr_378.g22734,Sc4wPfr_1201.g23950,Sc4wPfr_227.g25806,Sc4wP…	47	Sc4wPfr_388.1.g10262,Sc4wPfr_524.g10738,Sc4wPfr_73.g11515,Sc4wPfr_304.2.g12724,Sc4wPfr_1634.g13741,Sc4wPfr_635.g14731,Sc4wPfr_730.g15328,Sc4wPfr_730.g15330,Sc4wPfr_1100.g15616,Sc4wPfr_326.g15644,Sc4wPfr_237.2.g16168,Sc4wPfr_208.2.g17704,Sc4wPfr_1062.g19617,Sc4wPfr_1062.g19618,Sc4wPfr_977.1.g21529,Sc4wPfr_565.g22057,Sc4wPfr_378.g22734,Sc4wPfr_1201.g23950,Sc4wPfr_227.g25806,Sc4wPfr_788.g26563,Sc4wP…	9.8358e-23	3.3029e-19	57745	52	372	58203	13016.7	45186.3	99.2131	259.027	0.0395255
GO:0034975	protein folding in endoplasmic reticulum	11	Sc4wPfr_17.g15830,Sc4wPfr_237.2.g16168,Sc4wPfr_181.g16619,Sc4wPfr_181.g16619,Sc4wPfr_2237.g21056,Sc4wPfr_384.g24822,Sc4wPfr_372.g27995,Sc4wPfr_196.1.g29670,Sc4wPfr_624.g29786,Sc4wPfr_691.g31378,Sc4wPfr_589.g6025	10	Sc4wPfr_17.g15830,Sc4wPfr_237.2.g16168,Sc4wPfr_181.g16619,Sc4wPfr_2237.g21056,Sc4wPfr_384.g24822,Sc4wPfr_372.g27995,Sc4wPfr_196.1.g29670,Sc4wPfr_624.g29786,Sc4wPfr_691.g31378,Sc4wPfr_589.g6025	9.1534e-06	0.0208607	13099	2	14	13179	2817.67	10361.3	99.393	9.7746	0.0387248
GO:0000795	synaptonemal complex	12	Sc4wPfr_721.1.g9955,Sc4wPfr_73.g11515,Sc4wPfr_242.g27717,Sc4wPfr_242.g27717,Sc4wPfr_199.g28685,Sc4wPfr_240.g3656,Sc4wPfr_240.g3657,Sc4wPfr_830.g6288,Sc4wPfr_830.g6290,Sc4wPfr_1044.g6839,Sc4wPfr_1044.g6841,Sc4wPfr_719.g8277	10	Sc4wPfr_73.g11515,Sc4wPfr_242.g27717,Sc4wPfr_199.g28685,Sc4wPfr_240.g3656,Sc4wPfr_240.g3657,Sc4wPfr_830.g6288,Sc4wPfr_830.g6290,Sc4wPfr_1044.g6839,Sc4wPfr_1044.g6841,Sc4wPfr_719.g8277	7.4783e-05	0.147546	11521	3	22	11607	2529	9078	99.2591	15.2728	0.0377765
GO:0016458	gene silencing	4	Sc4wPfr_181.g16651,Sc4wPfr_181.2.g21310,Sc4wPfr_1201.1.g8691,Sc4wPfr_703.g8947	3	Sc4wPfr_181.g16651,Sc4wPfr_1201.1.g8691,Sc4wPfr_703.g8947	0.0147294	1	13048	3	22	13110	2833.5	10276.5	99.5271	15.2728	0.0374113
GO:0071392	cellular response to estradiol stimulus	9	Sc4wPfr_569.g11122,Sc4wPfr_221.g17485,Sc4wPfr_854.g18446,Sc4wPfr_10.g18961,Sc4wPfr_10.g18961,Sc4wPfr_381.1.g32154,Sc4wPfr_173.2.g33018,Sc4wPfr_502.g33807,Sc4wPfr_941.g5940	7	Sc4wPfr_569.g11122,Sc4wPfr_221.g17485,Sc4wPfr_854.g18446,Sc4wPfr_10.g18961,Sc4wPfr_381.1.g32154,Sc4wPfr_173.2.g33018,Sc4wPfr_941.g5940	0.00134697	1	18201	3	23	18327	3916.17	14410.8	99.3125	15.8837	0.0353118
GO:0007041	lysosomal transport	11	Sc4wPfr_2494.g10696,Sc4wPfr_180.g11691,Sc4wPfr_695.g12890,Sc4wPfr_365.g14967,Sc4wPfr_237.2.g16162,Sc4wPfr_237.2.g16162,Sc4wPfr_634.1.g17846,Sc4wPfr_270.1.g19663,Sc4wPfr_118.g25108,Sc4wPfr_216.g29051,Sc4wPfr_9.g31780	8	Sc4wPfr_2494.g10696,Sc4wPfr_695.g12890,Sc4wPfr_365.g14967,Sc4wPfr_237.2.g16162,Sc4wPfr_634.1.g17846,Sc4wPfr_270.1.g19663,Sc4wPfr_118.g25108,Sc4wPfr_216.g29051	0.00196131	1	15808	4	31	15948	3440.33	12507.7	99.1221	21.3819	0.0352852
GO:0030878	thyroid gland development	14	Sc4wPfr_165.g10051,Sc4wPfr_275.3.g1976,Sc4wPfr_439.g20916,Sc4wPfr_391.g24677,Sc4wPfr_251.g2461,Sc4wPfr_230.g26228,Sc4wPfr_226.1.g26815,Sc4wPfr_137.g27950,Sc4wPfr_137.g27953,Sc4wPfr_279.g30447,Sc4wPfr_884.g31954,Sc4wPfr_884.g31954,Sc4wPfr_628.g32849,Sc4wPfr_201.1.g33280	11	Sc4wPfr_165.g10051,Sc4wPfr_439.g20916,Sc4wPfr_391.g24677,Sc4wPfr_251.g2461,Sc4wPfr_226.1.g26815,Sc4wPfr_137.g27950,Sc4wPfr_137.g27953,Sc4wPfr_279.g30447,Sc4wPfr_884.g31954,Sc4wPfr_628.g32849,Sc4wPfr_201.1.g33280	0.00013374	0.246748	12705	2	16	12886	2808.83	10046.2	98.5954	10.9964	0.0348208
GO:0005832	chaperonin-containing T-complex	10	Sc4wPfr_489.2.g16713,Sc4wPfr_424.1.g2141,Sc4wPfr_1107.1.g29928,Sc4wPfr_381.1.g32291,Sc4wPfr_660.g32751,Sc4wPfr_502.g33815,Sc4wPfr_324.1.g5453,Sc4wPfr_324.1.g5454,Sc4wPfr_356.g7011,Sc4wPfr_356.g7013	10	Sc4wPfr_489.2.g16713,Sc4wPfr_424.1.g2141,Sc4wPfr_1107.1.g29928,Sc4wPfr_381.1.g32291,Sc4wPfr_660.g32751,Sc4wPfr_502.g33815,Sc4wPfr_324.1.g5453,Sc4wPfr_324.1.g5454,Sc4wPfr_356.g7011,Sc4wPfr_356.g7013	0	0	13288	2	17	13503	3088.33	10414.7	98.4078	11.6073	0.034763
GO:1904871	positive regulation of protein localization to Cajal body	10	Sc4wPfr_489.2.g16713,Sc4wPfr_424.1.g2141,Sc4wPfr_1107.1.g29928,Sc4wPfr_381.1.g32291,Sc4wPfr_660.g32751,Sc4wPfr_502.g33815,Sc4wPfr_324.1.g5453,Sc4wPfr_324.1.g5454,Sc4wPfr_356.g7011,Sc4wPfr_356.g7013	10	Sc4wPfr_489.2.g16713,Sc4wPfr_424.1.g2141,Sc4wPfr_1107.1.g29928,Sc4wPfr_381.1.g32291,Sc4wPfr_660.g32751,Sc4wPfr_502.g33815,Sc4wPfr_324.1.g5453,Sc4wPfr_324.1.g5454,Sc4wPfr_356.g7011,Sc4wPfr_356.g7013	0	0	13288	2	17	13503	3088.33	10414.7	98.4078	11.6073	0.034763
GO:0043254	regulation of protein complex assembly	23	Sc4wPfr_73.g11515,Sc4wPfr_174.g11845,Sc4wPfr_1357.2.g12119,Sc4wPfr_423.g13477,Sc4wPfr_423.g13477,Sc4wPfr_250.g15997,Sc4wPfr_523.g16320,Sc4wPfr_6.g19165,Sc4wPfr_422.g20156,Sc4wPfr_2673.g20324,Sc4wPfr_2673.g20325,Sc4wPfr_52.g22748,Sc4wPfr_57.2.g24939,Sc4wPfr_199.g28711,Sc4wPfr_364.g29946,Sc4wPfr_1357.1.g3218,Sc4wPfr_246.g4305,Sc4wPfr_1120.g5055,Sc4wPfr_1044.g6839,Sc4wPfr_1044.g6841,Sc4wPfr_582.g749…	19	Sc4wPfr_73.g11515,Sc4wPfr_174.g11845,Sc4wPfr_1357.2.g12119,Sc4wPfr_423.g13477,Sc4wPfr_250.g15997,Sc4wPfr_523.g16320,Sc4wPfr_6.g19165,Sc4wPfr_52.g22748,Sc4wPfr_57.2.g24939,Sc4wPfr_199.g28711,Sc4wPfr_364.g29946,Sc4wPfr_1357.1.g3218,Sc4wPfr_246.g4305,Sc4wPfr_1120.g5055,Sc4wPfr_1044.g6839,Sc4wPfr_1044.g6841,Sc4wPfr_582.g7491,Sc4wPfr_582.g7494,Sc4wPfr_289.1.g8528	3.6427e-07	0.00095549	29665	31	247	29964	6592.33	23371.7	99.0021	169.834	0.0345396
GO:0055131	C3HC4-type RING finger domain binding	15	Sc4wPfr_1300.g9812,Sc4wPfr_1300.g9812,Sc4wPfr_1300.g9816,Sc4wPfr_1300.g9816,Sc4wPfr_73.g11515,Sc4wPfr_422.g20156,Sc4wPfr_251.g2463,Sc4wPfr_226.1.g26808,Sc4wPfr_364.g29946,Sc4wPfr_381.1.g32271,Sc4wPfr_381.1.g32277,Sc4wPfr_62.g4480,Sc4wPfr_508.g5881,Sc4wPfr_1044.g6839,Sc4wPfr_1044.g6841	7	Sc4wPfr_73.g11515,Sc4wPfr_251.g2463,Sc4wPfr_364.g29946,Sc4wPfr_381.1.g32271,Sc4wPfr_62.g4480,Sc4wPfr_1044.g6839,Sc4wPfr_1044.g6841	0.110607	1	24596	30	239	24665	5354	19135	99.7203	164.335	0.0341013
GO:0042026	protein refolding	18	Sc4wPfr_73.g11515,Sc4wPfr_773.g11727,Sc4wPfr_519.g17991,Sc4wPfr_519.g17998,Sc4wPfr_14.g1834,Sc4wPfr_422.g20156,Sc4wPfr_289.g2548,Sc4wPfr_113.1.g28312,Sc4wPfr_638.g29677,Sc4wPfr_364.g29946,Sc4wPfr_691.g31371,Sc4wPfr_45.g3304,Sc4wPfr_62.g4480,Sc4wPfr_1044.g6839,Sc4wPfr_1044.g6840,Sc4wPfr_1044.g6841,Sc4wPfr_36.2.g7194,Sc4wPfr_289.1.g8528	17	Sc4wPfr_73.g11515,Sc4wPfr_773.g11727,Sc4wPfr_519.g17991,Sc4wPfr_519.g17998,Sc4wPfr_14.g1834,Sc4wPfr_289.g2548,Sc4wPfr_113.1.g28312,Sc4wPfr_638.g29677,Sc4wPfr_364.g29946,Sc4wPfr_691.g31371,Sc4wPfr_45.g3304,Sc4wPfr_62.g4480,Sc4wPfr_1044.g6839,Sc4wPfr_1044.g6840,Sc4wPfr_1044.g6841,Sc4wPfr_36.2.g7194,Sc4wPfr_289.1.g8528	5.6729e-09	1.6276e-05	16084	34	272	16152	3575.17	12576.8	99.579	186.939	0.0337598
GO:0036002	pre-mRNA binding	15	Sc4wPfr_146.g12058,Sc4wPfr_255.g21690,Sc4wPfr_68.g2323,Sc4wPfr_334.g26616,Sc4wPfr_334.g26616,Sc4wPfr_334.g26616,Sc4wPfr_169.g29130,Sc4wPfr_886.g29527,Sc4wPfr_1036.g319,Sc4wPfr_1036.g319,Sc4wPfr_381.1.g32275,Sc4wPfr_207.g3898,Sc4wPfr_1043.g6745,Sc4wPfr_719.g8320,Sc4wPfr_719.g8320	11	Sc4wPfr_146.g12058,Sc4wPfr_255.g21690,Sc4wPfr_68.g2323,Sc4wPfr_334.g26616,Sc4wPfr_169.g29130,Sc4wPfr_886.g29527,Sc4wPfr_1036.g319,Sc4wPfr_381.1.g32275,Sc4wPfr_207.g3898,Sc4wPfr_1043.g6745,Sc4wPfr_719.g8320	0.00045502	0.739403	10751	1	9	10838	2474	8218	99.1973	6.10912	0.0333711
GO:0007076	mitotic chromosome condensation	15	Sc4wPfr_309.g10790,Sc4wPfr_562.2.g1399,Sc4wPfr_562.2.g1399,Sc4wPfr_181.g16651,Sc4wPfr_181.2.g21310,Sc4wPfr_242.g27710,Sc4wPfr_242.g27711,Sc4wPfr_242.g27712,Sc4wPfr_242.g27713,Sc4wPfr_624.g29791,Sc4wPfr_1275.1.g32931,Sc4wPfr_1275.1.g32934,Sc4wPfr_1380.1.g8439,Sc4wPfr_16.1.g8456,Sc4wPfr_703.g8947	12	Sc4wPfr_562.2.g1399,Sc4wPfr_181.g16651,Sc4wPfr_242.g27710,Sc4wPfr_242.g27711,Sc4wPfr_242.g27712,Sc4wPfr_242.g27713,Sc4wPfr_624.g29791,Sc4wPfr_1275.1.g32931,Sc4wPfr_1275.1.g32934,Sc4wPfr_1380.1.g8439,Sc4wPfr_16.1.g8456,Sc4wPfr_703.g8947	5.3419e-05	0.107907	16618	2	16	16743	3533.67	13209.3	99.2534	10.9964	0.0333414
GO:0045721	negative regulation of gluconeogenesis	10	Sc4wPfr_165.g10084,Sc4wPfr_165.g10084,Sc4wPfr_165.g10084,Sc4wPfr_165.g10084,Sc4wPfr_96.g11950,Sc4wPfr_96.g11950,Sc4wPfr_347.g19275,Sc4wPfr_95.2.g19503,Sc4wPfr_248.g29623,Sc4wPfr_582.g7503	6	Sc4wPfr_165.g10084,Sc4wPfr_96.g11950,Sc4wPfr_347.g19275,Sc4wPfr_95.2.g19503,Sc4wPfr_248.g29623,Sc4wPfr_582.g7503	0.0253363	1	12141	3	25	12210	2547	9117	99.4349	17.1055	0.0333116
GO:0014015	positive regulation of gliogenesis	5	Sc4wPfr_14.g1836,Sc4wPfr_6.g19151,Sc4wPfr_372.g28037,Sc4wPfr_562.1.g31088,Sc4wPfr_338.1.g31632	4	Sc4wPfr_6.g19151,Sc4wPfr_372.g28037,Sc4wPfr_562.1.g31088,Sc4wPfr_338.1.g31632	0.00513064	1	10654	2	17	10728	2361.17	8366.83	99.3102	11.6073	0.0330463
GO:0023026	MHC class II protein complex binding	14	Sc4wPfr_73.g11515,Sc4wPfr_828.1.g12787,Sc4wPfr_828.1.g12788,Sc4wPfr_104.g15029,Sc4wPfr_422.g20156,Sc4wPfr_289.g2548,Sc4wPfr_182.g26067,Sc4wPfr_182.g26069,Sc4wPfr_364.g29946,Sc4wPfr_1269.g30707,Sc4wPfr_1044.g6839,Sc4wPfr_1044.g6841,Sc4wPfr_289.1.g8521,Sc4wPfr_289.1.g8528	12	Sc4wPfr_73.g11515,Sc4wPfr_828.1.g12787,Sc4wPfr_828.1.g12788,Sc4wPfr_104.g15029,Sc4wPfr_289.g2548,Sc4wPfr_182.g26067,Sc4wPfr_364.g29946,Sc4wPfr_1269.g30707,Sc4wPfr_1044.g6839,Sc4wPfr_1044.g6841,Sc4wPfr_289.1.g8521,Sc4wPfr_289.1.g8528	1.0513e-05	0.0235703	16345	35	289	16425	3660.5	12764.5	99.5129	197.936	0.0329285
GO:0043153	entrainment of circadian clock by photoperiod	12	Sc4wPfr_165.g10084,Sc4wPfr_165.g10084,Sc4wPfr_165.g10084,Sc4wPfr_165.g10084,Sc4wPfr_180.g11658,Sc4wPfr_96.g11950,Sc4wPfr_96.g11950,Sc4wPfr_226.g15124,Sc4wPfr_347.g19275,Sc4wPfr_364.g29945,Sc4wPfr_856.g31442,Sc4wPfr_109.1.g7292	6	Sc4wPfr_165.g10084,Sc4wPfr_180.g11658,Sc4wPfr_96.g11950,Sc4wPfr_226.g15124,Sc4wPfr_347.g19275,Sc4wPfr_856.g31442	0.0827209	1	11240	4	35	11306	2378.17	8421.83	99.4162	23.8256	0.0319646
GO:0030518	intracellular steroid hormone receptor signaling pathway	8	Sc4wPfr_365.g14967,Sc4wPfr_3873.g15181,Sc4wPfr_270.1.g19663,Sc4wPfr_118.g25108,Sc4wPfr_343.1.g25973,Sc4wPfr_45.g3351,Sc4wPfr_144.3.g33742,Sc4wPfr_306.g769	8	Sc4wPfr_365.g14967,Sc4wPfr_3873.g15181,Sc4wPfr_270.1.g19663,Sc4wPfr_118.g25108,Sc4wPfr_343.1.g25973,Sc4wPfr_45.g3351,Sc4wPfr_144.3.g33742,Sc4wPfr_306.g769	0	0	12267	2	18	12399	2759.5	9639.5	98.9354	12.2182	0.0316736
GO:0000974	Prp19 complex	24	Sc4wPfr_177.g9412,Sc4wPfr_73.g11515,Sc4wPfr_146.g12058,Sc4wPfr_322.g12149,Sc4wPfr_322.g12149,Sc4wPfr_322.g12150,Sc4wPfr_274.2.g1517,Sc4wPfr_280.1.g15545,Sc4wPfr_182.1.g16258,Sc4wPfr_523.g16369,Sc4wPfr_262.2.g17784,Sc4wPfr_1096.g19441,Sc4wPfr_422.g20156,Sc4wPfr_422.g20167,Sc4wPfr_908.g21208,Sc4wPfr_908.g21208,Sc4wPfr_135.g21808,Sc4wPfr_50.g22235,Sc4wPfr_364.g29946,Sc4wPfr_396.g3089,Sc4wPfr_253.1.g…	20	Sc4wPfr_177.g9412,Sc4wPfr_73.g11515,Sc4wPfr_146.g12058,Sc4wPfr_322.g12149,Sc4wPfr_322.g12150,Sc4wPfr_274.2.g1517,Sc4wPfr_280.1.g15545,Sc4wPfr_182.1.g16258,Sc4wPfr_523.g16369,Sc4wPfr_262.2.g17784,Sc4wPfr_1096.g19441,Sc4wPfr_908.g21208,Sc4wPfr_135.g21808,Sc4wPfr_50.g22235,Sc4wPfr_364.g29946,Sc4wPfr_396.g3089,Sc4wPfr_253.1.g5537,Sc4wPfr_253.1.g5540,Sc4wPfr_1044.g6839,Sc4wPfr_1044.g6841	1.4439e-07	0.00038652	32895	27	246	33119	7380.5	25727.5	99.3237	166.779	0.0308026
GO:0005827	polar microtubule	11	Sc4wPfr_347.g19276,Sc4wPfr_347.g19279,Sc4wPfr_347.g19282,Sc4wPfr_347.g19284,Sc4wPfr_347.g19346,Sc4wPfr_347.g19346,Sc4wPfr_347.g19349,Sc4wPfr_488.g29964,Sc4wPfr_330.g6879,Sc4wPfr_36.2.g7200,Sc4wPfr_36.2.g7201	9	Sc4wPfr_347.g19276,Sc4wPfr_347.g19279,Sc4wPfr_347.g19284,Sc4wPfr_347.g19346,Sc4wPfr_347.g19349,Sc4wPfr_488.g29964,Sc4wPfr_330.g6879,Sc4wPfr_36.2.g7200,Sc4wPfr_36.2.g7201	0.00019762	0.349793	11626	1	9	12294	2628.33	9665.67	94.5665	6.10912	0.0301469
GO:0061635	regulation of protein complex stability	10	Sc4wPfr_73.g11515,Sc4wPfr_615.1.g17675,Sc4wPfr_615.1.g17675,Sc4wPfr_422.g20156,Sc4wPfr_169.g29108,Sc4wPfr_364.g29946,Sc4wPfr_1044.g6839,Sc4wPfr_1044.g6841,Sc4wPfr_289.1.g8521,Sc4wPfr_289.1.g8528	8	Sc4wPfr_73.g11515,Sc4wPfr_615.1.g17675,Sc4wPfr_169.g29108,Sc4wPfr_364.g29946,Sc4wPfr_1044.g6839,Sc4wPfr_1044.g6841,Sc4wPfr_289.1.g8521,Sc4wPfr_289.1.g8528	0.00051829	0.832378	12197	30	265	12243	2657.83	9570.17	99.6243	180.219	0.029362
GO:1990745	EARP complex	6	Sc4wPfr_2494.g10696,Sc4wPfr_237.2.g16162,Sc4wPfr_237.2.g16162,Sc4wPfr_634.1.g17846,Sc4wPfr_673.1.g28290,Sc4wPfr_2330.g31102	5	Sc4wPfr_2494.g10696,Sc4wPfr_237.2.g16162,Sc4wPfr_634.1.g17846,Sc4wPfr_673.1.g28290,Sc4wPfr_2330.g31102	0.00178704	1	10307	3	27	10410	2173.17	8236.83	99.0106	18.3274	0.0290786
GO:0032703	negative regulation of interleukin-2 production	7	Sc4wPfr_469.1.g10205,Sc4wPfr_854.g18446,Sc4wPfr_10.g18961,Sc4wPfr_10.g18961,Sc4wPfr_650.g22963,Sc4wPfr_381.1.g32154,Sc4wPfr_941.g5940	6	Sc4wPfr_469.1.g10205,Sc4wPfr_854.g18446,Sc4wPfr_10.g18961,Sc4wPfr_650.g22963,Sc4wPfr_381.1.g32154,Sc4wPfr_941.g5940	0.0006224	0.964724	14471	2	19	14562	3115.83	11446.2	99.3751	12.8292	0.028541
GO:0030428	cell septum	13	Sc4wPfr_1114.g10933,Sc4wPfr_90.g1144,Sc4wPfr_174.g11811,Sc4wPfr_275.3.g1981,Sc4wPfr_275.3.g1981,Sc4wPfr_977.1.g21529,Sc4wPfr_42.2.g22105,Sc4wPfr_118.g25132,Sc4wPfr_363.2.g30345,Sc4wPfr_363.2.g30345,Sc4wPfr_856.g31442,Sc4wPfr_259.g33646,Sc4wPfr_269.g7752	10	Sc4wPfr_1114.g10933,Sc4wPfr_90.g1144,Sc4wPfr_174.g11811,Sc4wPfr_977.1.g21529,Sc4wPfr_42.2.g22105,Sc4wPfr_118.g25132,Sc4wPfr_363.2.g30345,Sc4wPfr_856.g31442,Sc4wPfr_259.g33646,Sc4wPfr_269.g7752	0.00033144	0.552186	11934	1	11	12055	2595	9258	98.9963	7.33095	0.0254114
GO:0061202	clathrin-sculpted gamma-aminobutyric acid transport vesicle membrane	13	Sc4wPfr_388.1.g10262,Sc4wPfr_73.g11515,Sc4wPfr_1010.g13523,Sc4wPfr_1061.g18817,Sc4wPfr_1061.g18818,Sc4wPfr_422.g20156,Sc4wPfr_227.g25806,Sc4wPfr_364.g29946,Sc4wPfr_396.g3103,Sc4wPfr_691.g31338,Sc4wPfr_1044.g6839,Sc4wPfr_1044.g6841,Sc4wPfr_356.g7134	11	Sc4wPfr_388.1.g10262,Sc4wPfr_73.g11515,Sc4wPfr_1010.g13523,Sc4wPfr_1061.g18817,Sc4wPfr_1061.g18818,Sc4wPfr_227.g25806,Sc4wPfr_364.g29946,Sc4wPfr_691.g31338,Sc4wPfr_1044.g6839,Sc4wPfr_1044.g6841,Sc4wPfr_356.g7134	2.8117e-05	0.0589327	14695	21	227	14760	3218.5	11541.5	99.5596	151.506	0.0245948
GO:0046686	response to cadmium ion	15	Sc4wPfr_73.g11515,Sc4wPfr_53.g21913,Sc4wPfr_1903.g23153,Sc4wPfr_1163.g25137,Sc4wPfr_954.g27104,Sc4wPfr_364.g29946,Sc4wPfr_1626.g30667,Sc4wPfr_1626.g30669,Sc4wPfr_383.g33550,Sc4wPfr_177.1.g6095,Sc4wPfr_1044.g6839,Sc4wPfr_1044.g6840,Sc4wPfr_1044.g6841,Sc4wPfr_36.2.g7202,Sc4wPfr_85.g877	14	Sc4wPfr_73.g11515,Sc4wPfr_53.g21913,Sc4wPfr_1903.g23153,Sc4wPfr_1163.g25137,Sc4wPfr_954.g27104,Sc4wPfr_364.g29946,Sc4wPfr_1626.g30669,Sc4wPfr_383.g33550,Sc4wPfr_177.1.g6095,Sc4wPfr_1044.g6839,Sc4wPfr_1044.g6840,Sc4wPfr_1044.g6841,Sc4wPfr_36.2.g7202,Sc4wPfr_85.g877	1.345e-07	0.00036233	13062	20	227	13161	2937.67	10223.3	99.2478	150.895	0.0240206
GO:0046688	response to copper ion	11	Sc4wPfr_73.g11515,Sc4wPfr_289.g2550,Sc4wPfr_364.g29946,Sc4wPfr_85.1.g31220,Sc4wPfr_1044.g6839,Sc4wPfr_1044.g6840,Sc4wPfr_1044.g6841,Sc4wPfr_36.2.g7202,Sc4wPfr_85.g866,Sc4wPfr_85.g868,Sc4wPfr_85.g877	10	Sc4wPfr_73.g11515,Sc4wPfr_289.g2550,Sc4wPfr_364.g29946,Sc4wPfr_85.1.g31220,Sc4wPfr_1044.g6839,Sc4wPfr_1044.g6840,Sc4wPfr_1044.g6841,Sc4wPfr_36.2.g7202,Sc4wPfr_85.g866,Sc4wPfr_85.g877	9.1534e-06	0.0208607	11803	19	230	11871	2683.5	9187.5	99.4272	152.117	0.0227533
GO:0001410	chlamydospore formation	7	Sc4wPfr_104.g15029,Sc4wPfr_250.g15999,Sc4wPfr_634.1.g17867,Sc4wPfr_42.2.g22105,Sc4wPfr_350.g2265,Sc4wPfr_350.g2265,Sc4wPfr_383.g33543	6	Sc4wPfr_104.g15029,Sc4wPfr_250.g15999,Sc4wPfr_634.1.g17867,Sc4wPfr_42.2.g22105,Sc4wPfr_350.g2265,Sc4wPfr_383.g33543	0.0006224	0.964724	11137	1	12	11300	2392.83	8857.17	98.5575	7.94186	0.0224395
GO:0005686	U2 snRNP	18	Sc4wPfr_952.1.g9538,Sc4wPfr_696.g10813,Sc4wPfr_730.1.g137,Sc4wPfr_181.g16620,Sc4wPfr_761.g1923,Sc4wPfr_455.g20391,Sc4wPfr_455.g20391,Sc4wPfr_568.g22805,Sc4wPfr_541.g23649,Sc4wPfr_319.g27303,Sc4wPfr_405.g27544,Sc4wPfr_82.1.g28989,Sc4wPfr_82.1.g28991,Sc4wPfr_290.1.g3138,Sc4wPfr_381.1.g32188,Sc4wPfr_672.g32786,Sc4wPfr_941.g5939,Sc4wPfr_719.g8334	17	Sc4wPfr_952.1.g9538,Sc4wPfr_696.g10813,Sc4wPfr_730.1.g137,Sc4wPfr_181.g16620,Sc4wPfr_761.g1923,Sc4wPfr_455.g20391,Sc4wPfr_568.g22805,Sc4wPfr_541.g23649,Sc4wPfr_319.g27303,Sc4wPfr_405.g27544,Sc4wPfr_82.1.g28989,Sc4wPfr_82.1.g28991,Sc4wPfr_290.1.g3138,Sc4wPfr_381.1.g32188,Sc4wPfr_672.g32786,Sc4wPfr_941.g5939,Sc4wPfr_719.g8334	5.6729e-09	1.6276e-05	16691	2	26	16881	3804.83	13076.2	98.8745	17.1055	0.0222828
GO:0071236	cellular response to antibiotic	6	Sc4wPfr_85.g928,Sc4wPfr_237.2.g16168,Sc4wPfr_95.2.g19496,Sc4wPfr_439.g20897,Sc4wPfr_520.g29418,Sc4wPfr_594.g3248	6	Sc4wPfr_85.g928,Sc4wPfr_237.2.g16168,Sc4wPfr_95.2.g19496,Sc4wPfr_439.g20897,Sc4wPfr_520.g29418,Sc4wPfr_594.g3248	0	0	10110	1	12	10158	2136.67	8021.33	99.5275	7.94186	0.0221164
GO:0008053	mitochondrial fusion	10	Sc4wPfr_1303.g19236,Sc4wPfr_131.1.g19986,Sc4wPfr_131.1.g19986,Sc4wPfr_1354.g22271,Sc4wPfr_1354.g22273,Sc4wPfr_432.1.g24061,Sc4wPfr_432.1.g24061,Sc4wPfr_109.1.g7300,Sc4wPfr_269.g7775,Sc4wPfr_719.g8338	8	Sc4wPfr_1303.g19236,Sc4wPfr_131.1.g19986,Sc4wPfr_1354.g22271,Sc4wPfr_1354.g22273,Sc4wPfr_432.1.g24061,Sc4wPfr_109.1.g7300,Sc4wPfr_269.g7775,Sc4wPfr_719.g8338	0.00051829	0.832378	10866	2	26	11007	2350.33	8368.67	98.719	17.1055	0.0214475
GO:1902904	negative regulation of supramolecular fiber organization	9	Sc4wPfr_73.g11515,Sc4wPfr_422.g20156,Sc4wPfr_555.g27153,Sc4wPfr_364.g29946,Sc4wPfr_628.g32850,Sc4wPfr_1044.g6839,Sc4wPfr_1044.g6841,Sc4wPfr_36.2.g7204,Sc4wPfr_36.2.g7204	7	Sc4wPfr_73.g11515,Sc4wPfr_555.g27153,Sc4wPfr_364.g29946,Sc4wPfr_628.g32850,Sc4wPfr_1044.g6839,Sc4wPfr_1044.g6841,Sc4wPfr_36.2.g7204	0.00134697	1	13000	18	226	13146	2906.5	10239.5	98.8894	149.063	0.0214395
GO:0051384	response to glucocorticoid	12	Sc4wPfr_138.g13934,Sc4wPfr_679.g1434,Sc4wPfr_224.g18100,Sc4wPfr_455.g20376,Sc4wPfr_53.g21913,Sc4wPfr_132.g22688,Sc4wPfr_199.g28654,Sc4wPfr_199.g28659,Sc4wPfr_739.g28832,Sc4wPfr_364.g29945,Sc4wPfr_850.1.g5734,Sc4wPfr_941.g5933	11	Sc4wPfr_138.g13934,Sc4wPfr_679.g1434,Sc4wPfr_224.g18100,Sc4wPfr_455.g20376,Sc4wPfr_53.g21913,Sc4wPfr_132.g22688,Sc4wPfr_199.g28654,Sc4wPfr_199.g28659,Sc4wPfr_739.g28832,Sc4wPfr_850.1.g5734,Sc4wPfr_941.g5933	3.1871e-06	0.00772563	14072	1	14	14541	3281.17	11259.8	96.7746	9.16369	0.0207566
GO:0042623	ATPase activity, coupled	12	Sc4wPfr_73.g11515,Sc4wPfr_776.g16571,Sc4wPfr_107.1.g20615,Sc4wPfr_520.g29404,Sc4wPfr_364.g29946,Sc4wPfr_175.1.g31530,Sc4wPfr_338.1.g31615,Sc4wPfr_259.g33646,Sc4wPfr_1044.g6839,Sc4wPfr_1044.g6841,Sc4wPfr_356.g7011,Sc4wPfr_356.g7013	10	Sc4wPfr_73.g11515,Sc4wPfr_107.1.g20615,Sc4wPfr_364.g29946,Sc4wPfr_175.1.g31530,Sc4wPfr_338.1.g31615,Sc4wPfr_259.g33646,Sc4wPfr_1044.g6839,Sc4wPfr_1044.g6841,Sc4wPfr_356.g7011,Sc4wPfr_356.g7013	7.4783e-05	0.147546	15335	17	223	15531	3436	12095	98.738	146.619	0.0207249
GO:0048026	positive regulation of mRNA splicing, via spliceosome	17	Sc4wPfr_1463.g9577,Sc4wPfr_73.g11515,Sc4wPfr_773.g11725,Sc4wPfr_773.g11725,Sc4wPfr_773.g11725,Sc4wPfr_1096.g19441,Sc4wPfr_364.g29946,Sc4wPfr_363.2.g30370,Sc4wPfr_240.g3639,Sc4wPfr_240.g3639,Sc4wPfr_62.g4502,Sc4wPfr_62.g4502,Sc4wPfr_62.g4502,Sc4wPfr_62.g4502,Sc4wPfr_305.g4589,Sc4wPfr_1394.g4669,Sc4wPfr_1044.g6841	11	Sc4wPfr_1463.g9577,Sc4wPfr_73.g11515,Sc4wPfr_773.g11725,Sc4wPfr_1096.g19441,Sc4wPfr_364.g29946,Sc4wPfr_363.2.g30370,Sc4wPfr_240.g3639,Sc4wPfr_62.g4502,Sc4wPfr_305.g4589,Sc4wPfr_1394.g4669,Sc4wPfr_1044.g6841	0.00287817	1	14302	16	236	14409	3344.33	11064.7	99.2574	153.95	0.0195307
GO:0044183	protein binding involved in protein folding	14	Sc4wPfr_695.g12891,Sc4wPfr_489.2.g16713,Sc4wPfr_231.1.g21559,Sc4wPfr_384.g24822,Sc4wPfr_113.1.g28312,Sc4wPfr_1107.1.g29928,Sc4wPfr_463.g30885,Sc4wPfr_691.g31371,Sc4wPfr_381.1.g32291,Sc4wPfr_660.g32751,Sc4wPfr_502.g33815,Sc4wPfr_324.1.g5453,Sc4wPfr_324.1.g5454,Sc4wPfr_850.1.g5716	14	Sc4wPfr_695.g12891,Sc4wPfr_489.2.g16713,Sc4wPfr_231.1.g21559,Sc4wPfr_384.g24822,Sc4wPfr_113.1.g28312,Sc4wPfr_1107.1.g29928,Sc4wPfr_463.g30885,Sc4wPfr_691.g31371,Sc4wPfr_381.1.g32291,Sc4wPfr_660.g32751,Sc4wPfr_502.g33815,Sc4wPfr_324.1.g5453,Sc4wPfr_324.1.g5454,Sc4wPfr_850.1.g5716	0	0	15523	1	15	15621	3501.83	12119.2	99.3726	9.7746	0.0192093
GO:0031100	animal organ regeneration	11	Sc4wPfr_519.g18019,Sc4wPfr_132.g22688,Sc4wPfr_319.g27268,Sc4wPfr_319.g27364,Sc4wPfr_199.g28654,Sc4wPfr_199.g28659,Sc4wPfr_850.1.g5732,Sc4wPfr_172.g6061,Sc4wPfr_172.g6061,Sc4wPfr_36.2.g7202,Sc4wPfr_85.g877	10	Sc4wPfr_519.g18019,Sc4wPfr_132.g22688,Sc4wPfr_319.g27268,Sc4wPfr_319.g27364,Sc4wPfr_199.g28654,Sc4wPfr_199.g28659,Sc4wPfr_850.1.g5732,Sc4wPfr_172.g6061,Sc4wPfr_36.2.g7202,Sc4wPfr_85.g877	9.1534e-06	0.0208607	11984	1	16	12117	2717.67	9399.33	98.9024	10.3855	0.0180011
GO:0002199	zona pellucida receptor complex	10	Sc4wPfr_489.2.g16713,Sc4wPfr_424.1.g2141,Sc4wPfr_1107.1.g29928,Sc4wPfr_364.g29946,Sc4wPfr_381.1.g32291,Sc4wPfr_660.g32751,Sc4wPfr_324.1.g5453,Sc4wPfr_324.1.g5454,Sc4wPfr_1044.g6841,Sc4wPfr_356.g7013	10	Sc4wPfr_489.2.g16713,Sc4wPfr_424.1.g2141,Sc4wPfr_1107.1.g29928,Sc4wPfr_364.g29946,Sc4wPfr_381.1.g32291,Sc4wPfr_660.g32751,Sc4wPfr_324.1.g5453,Sc4wPfr_324.1.g5454,Sc4wPfr_1044.g6841,Sc4wPfr_356.g7013	0	0	12263	12	218	12387	2851.33	9535.67	98.999	140.51	0.0156188
GO:0045200	establishment of neuroblast polarity	6	Sc4wPfr_641.g16841,Sc4wPfr_1761.g20585,Sc4wPfr_1761.g20586,Sc4wPfr_439.g20897,Sc4wPfr_594.g3248,Sc4wPfr_1.g5785	6	Sc4wPfr_641.g16841,Sc4wPfr_1761.g20585,Sc4wPfr_1761.g20586,Sc4wPfr_439.g20897,Sc4wPfr_594.g3248,Sc4wPfr_1.g5785	0	0	10024	1	19	10137	2173.5	7963.5	98.8853	12.2182	0.0142822

## Sheet: S6 Methodical comparison
Supplement Table S6. Methodical comparison of single cell mutation rate determination in Hydra (this paper) and human / mouse (Milholland et al., 2017).
	Same strategy with minor differences regarding exact kits / devices used
	Precisely the same approach applied
	Methodical steps	Hydra (this paper)	Human & mouse (Milholland et al, 2017)
Wet-lab part	Amplification strategy	Multiple displacement amplification using Phi-29 Polymerase Kit: GE Healthcare Illustra Single Cell GenomiPhi	Multiple displacement amplification using Phi-29 Polymerase Kit: Qiagen REPLI-g UltraFast Mini
	Library preparation	PCR-free Kit: Illumina TruSeq DNA PCR-free	PCR-free Kit: Swift Biosciences Accel-NGS 2S DNA Library
	Sequencing approach	Illumina paired-end sequencing Devices: HiSeq2500, NovaSeq Read lengths: 100 and 250 base pairs	Illumina paired-end sequencing Device: HiSeq2500 Read length: 250 base pairs
Dry-lab part	Adapter & quality trimming	Trim Galore	Trim Galore
	Duplicate removal	Samtools	Samtools
	Read mapping	BWA mem	BWA mem
	Indel-realignment & BQSR	GATK	GATK
	Mutation calling	Mutect ∩Varscan ∩ UnifiedGenotyper	Mutect ∩Varscan ∩ UnifiedGenotyper

## Sheet: S7 Homozygous vs Heterozygous
Supplement Table S7. Distribution of hetero- and homozygous single-cell SNVs by their prevalence in the nine individuals.
No. Of individuals with SC-seq derived variants	Homozygous SNVs	Heterozygous SNVs	Homozygous SNVs / Heterozygous SNVs	Heterozygous mutation frequency [Heterozygous SNVs / Sufficiently covered genome bases]	Expected homozygous mutation frequency [ = (Heterozygous mutation frequency)^2 ]	Observed homozygous mutation frequency [= Homozygous SNVs / Sufficiently covered genome bases]	Observed / expected Homozygous mutation frequency
0	1079	11321	0.0953096	0.000159929	2.55772e-08	1.52427e-05	595.95
1	156	1380	0.113043	1.94949e-05	3.80051e-10	2.20377e-06	5798.62
2	146	924	0.158009	1.30531e-05	1.70383e-10	2.0625e-06	12105.1
3	126	869	0.144994	1.22761e-05	1.50703e-10	1.77997e-06	11811.1
4	156	821	0.190012	1.1598e-05	1.34515e-10	2.20377e-06	16383.1
5	244	874	0.279176	1.23468e-05	1.52443e-10	3.44692e-06	22611.3
6	297	1068	0.27809	1.50874e-05	2.27628e-10	4.19564e-06	18432
7	501	1619	0.30945	2.28712e-05	5.23091e-10	7.07749e-06	13530.1
8	1091	3466	0.314772	4.89633e-05	2.3974e-09	1.54123e-05	6428.74
9	3990	11029	0.361774	0.000155804	2.42748e-08	5.63657e-05	2321.98

## Sheet: S8 stop-gain
Supplement Table S8. All examined biological processes with enrichments for stop-gain mutations in the comparison of the individuals vs. the reference.
#all genes	33820
#all nonsense genes	4743
GO_ID	Description	#genes in term	genes	#covered_bases	#bases	%covered_bases	# nonsense positions	#expected_nonsense_genes	#nonsense_genes_in_pathway	fisher.pvalue	fisher.fdr
GO:0090304	nucleic acid metabolic process	574	Sc4wPfr_2575.g9477,Sc4wPfr_952.1.g9539,Sc4wPfr_1463.g9574,Sc4wPfr_85.g956,Sc4wPfr_662.g967,Sc4wPfr_662.g976,Sc4wPfr_662.g980,Sc4wPfr_165.g10009,Sc4wPfr_165.g10061,Sc4wPfr_165.g10062,Sc4wPfr_662.g994,Sc4wPfr_388.1.g10277,Sc4wPfr_388.1.g10289,Sc4wPfr_504.g10318,Sc4wPfr_78.g10415,Sc4wPfr_2233.g10474,Sc4wPfr_552.g10535,Sc4wPfr_178.g10643,Sc4wPfr_178.g10659,Sc4wPfr_1320.g10826,Sc4wPfr_4670.g10939,Sc4w…	894231	924453	96.7308	213	80.5135	139	3.7555e-11	4.5036e-07
GO:0016787	hydrolase activity	685	Sc4wPfr_2575.g9477,Sc4wPfr_952.1.g9539,Sc4wPfr_1463.g9574,Sc4wPfr_85.g956,Sc4wPfr_662.g967,Sc4wPfr_122.g9864,Sc4wPfr_662.g976,Sc4wPfr_662.g980,Sc4wPfr_165.g10009,Sc4wPfr_165.g10061,Sc4wPfr_165.g10062,Sc4wPfr_165.g10072,Sc4wPfr_662.g994,Sc4wPfr_388.1.g10277,Sc4wPfr_504.g10318,Sc4wPfr_78.g10415,Sc4wPfr_2233.g10474,Sc4wPfr_178.g10643,Sc4wPfr_178.g10659,Sc4wPfr_1320.g10826,Sc4wPfr_4670.g10939,Sc4wPfr…	1051893	1084685	96.9768	226	96.0831	150	1.16928e-08	7.01103e-05
